# Supplementary material
Source: PubMed Central journal article supplement (PMC6863621)
Supplement: ja9b07841_si_001.pdf [file ja9b07841_si_001.pdf]

# Relaxation Dispersion NMR to reveal fast Dynamics in Brønsted Acid Catalysis: Influence of Sterics and H-bond strength on conformations and substrate hopping

N. Lokesh, Johnny Hioe, Johannes Gramüller and Ruth M. Gschwind\*

Institute for organic chemistry,  
University of Regensburg, D-93053 Regensburg, Germany

E-mail : ruth.gschwind@chemie.uni-regensburg.de

## Supplementary Material

|                                                                          |    |
|--------------------------------------------------------------------------|----|
| Experimental data .....                                                  | 3  |
| Synthesis of Imine Substrates.....                                       | 4  |
| Sample preparation.....                                                  | 5  |
| Preparation of binary complexes in CD <sub>2</sub> Cl <sub>2</sub> ..... | 5  |
| Spectrometer data .....                                                  | 6  |
| Pulse programs .....                                                     | 6  |
| Acquisition Parameters .....                                             | 6  |
| 1D <sup>1</sup> H off-resonance R <sub>1ρ</sub> .....                    | 8  |
| Pulse Sequence .....                                                     | 8  |
| Parameter Optimization .....                                             | 8  |
| Method testing.....                                                      | 9  |
| Curve fitting .....                                                      | 10 |
| Directionality.....                                                      | 10 |
| Results of the R <sub>1ρ</sub> measurements .....                        | 11 |
| TRIP/3 .....                                                             | 11 |
| TRIP/2 .....                                                             | 12 |
| TiPSY/1 .....                                                            | 13 |
| TRIM/2 and TRIM/3.....                                                   | 14 |
| NMR-Structural analysis of CPA/imine complexes.....                      | 15 |
| Chemical Shift assignment of TRIM/4.....                                 | 15 |
| Identification of Type I E and Type II E .....                           | 15 |
| DOSY measurements of TRIM/4 .....                                        | 17 |

|                                                                                   |    |
|-----------------------------------------------------------------------------------|----|
| Estimation of the rotational correlation time of binary CPA/imine complexes ..... | 18 |
| TiPSY/1 .....                                                                     | 19 |
| Exchange with free imines .....                                                   | 20 |
| <i>Computational Details</i> .....                                                | 23 |
| References.....                                                                   | 54 |

## Experimental data

Deuterated solvents were purchased from Deutero or Sigma Aldrich. Where dry solvents were essential,  $\text{CD}_2\text{Cl}_2$  was freshly distilled over  $\text{CaH}_2$  and Toluene was refluxed over Na/Benzophenone under argon atmosphere. The catalysts were purchased from Sigma Aldrich or STREM chemicals.

High-resolution mass spectra were measured by the central analytics division in the Institute of Organic Chemistry. Gas chromatography coupled with a mass selective detector was performed on an Agilent 6890N Network GC-System.

## Synthesis of Imine Substrates

The imines were prepared as described in the literature.<sup>1-4</sup> The toluene was used either in p.A. quality or was dried by refluxing over sodium. The <sup>15</sup>N-enriched aniline (if used) was purchased from Euriso-top GmbH and Sigma Aldrich.

### (E)-N,1-bis(4-(tert-butyl)phenyl)ethan-1-imine [5]

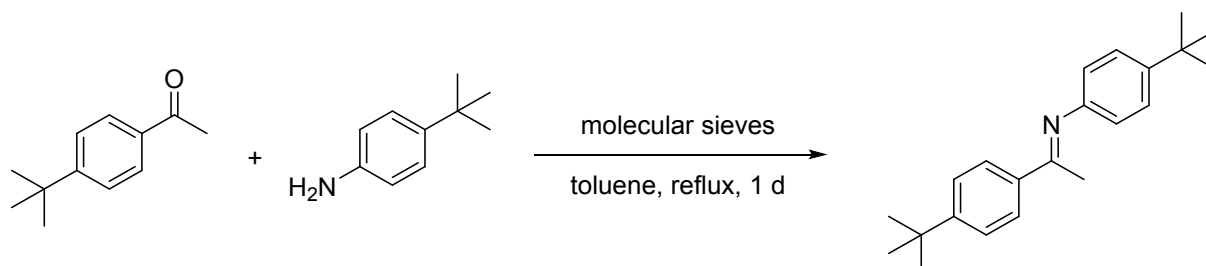

Molecular sieves 4 Å (4 g) was weighed into a 50 mL Schlenk flask and dried with a heat gun at 350 °C for 30 min under reduced pressure. Under Argon flow, 4-(*tert*-butyl)aniline (10.0 mmol, 1.49 g, 1.60 mL, 1.0 eq) and 1-(4-(*tert*-butyl)phenyl)ethan-1-one (10.0 mmol, 1.76 g, 1.83 mL, 1.0 eq.) were added and dissolved in 20 mL anhydrous toluene. Under Argon flow, a reflux condenser was added to the setup and flushed with argon for 3 min. A drying tube filled with CaCl<sub>2</sub> was added to the setup. The solution was refluxed for 24 h. Afterward, the heating bath was removed, and the reaction mixture allowed to cool down. The orange mixture was filtrated, and the solvent was removed under reduced pressure to give an orange-yellow solid. The crude product was washed with methanol to give the product (4.76 mmol, 1.46 g, 48%) as yellow needles predominantly as its *E*-isomer (>99% determined by <sup>1</sup>H NMR).

**<sup>1</sup>H-NMR** (400.1 MHz, CD<sub>2</sub>Cl<sub>2</sub>) δ<sub>H</sub> = 7.91 (m, 2H), 7.48 (m, 2H), 7.37 (m, 2H), 6.71 (m, 2H), 2.21 (s, 3H), 1.36 (s, 9H), 1.34 ppm (s, 9H).

**<sup>13</sup>C-NMR {<sup>1</sup>H}** (100.6 MHz): δ<sub>C</sub> = 164.8, 153.7, 149.2, 145.8, 137.0, 126.8, 125.7, 125.2, 119.0, 34.7, 34.1, 31.2, 31.0, 16.9 ppm.

**HR-MS** (ESI, *m/z*): found 307.2289 (M)<sup>+</sup> (calculated for 307.2300 for C<sub>22</sub>H<sub>29</sub>N); Diff(ppm) = -1.92 ppm.

## Sample preparation

### *Preparation of binary complexes in $CD_2Cl_2$*

The catalyst was dried for 30 min at 150°C under reduced pressure. Ketimine and catalyst were directly weighed into a 5 mm NMR tube under an inert argon atmosphere.  $CD_2Cl_2$  (0.6 ml; freshly distilled over  $CaH_2$ ) and 1.0 ml of tetramethylsilane atmosphere were added to the tube. The sample was stored in an -80°C freezer. A 1:1 ratio of catalyst/ketimine was used for all samples unless stated otherwise. A concentration of 0.25 – 100 mM was used, as indicated specifically.

## Spectrometer data

NMR experiments were performed on Bruker Avance III HD 400 MHz spectrometer, equipped with 5 mm BBO BB-1H/D probe head with Z-Gradients and a Bruker Avance III HD 600 MHz spectrometer, equipped with a 5 mm CPPBBO BB-1H/19F. The temperature was controlled in the VT-experiments by BVT 3000 and BVTE 3900. For NMR measurements employing standard NMR solvents 5 mm NMR tubes were used, if not otherwise noted. NMR Data were processed, evaluated and plotted with TopSpin 3.2 software. Further plotting of the spectra was performed with Corel Draw X14 – X17 software.  $^1\text{H}$ ,  $^{13}\text{C}$  chemical shifts were referenced to TMS or the respective solvent signals. The heteronuclei  $^{19}\text{F}$  and  $^{31}\text{P}$  were referenced, employing  $\nu(\text{X}) = \nu(\text{TMS}) \times \frac{\epsilon_{\text{reference}}}{100} \%$  according to Harris et al.<sup>5</sup> The following frequency ratios and reference compounds were used:  $\Xi(^{19}\text{F}) = 94.094011$  ( $\text{CCl}_3\text{F}$ ),  $\Xi(^{31}\text{P}) = 40.480742$  ( $\text{H}_3\text{PO}_4$ ).

### *Pulse programs*

All pulse programs used are standard Bruker NMR pulseprograms except for the  $\text{R}_{1\rho}$  measurements.

### *Acquisition Parameters*

$^1\text{H}$  NMR: Pulse program: zg; Relaxation delay = 2 – 3 s, Acquisition time = 2.48 s, SW = 22.0 ppm, TD = 64k, NS = 8 – 64; zg30; Relaxation delay = 2 s, Acquisition time = 2.48 s, SW = 22.0 ppm, TD = 64k, NS = 8 – 64;

2D- $^1\text{H}$ ,  $^1\text{H}$  NOESY: Pulse program: noesygpqh/oesygpqh; Relaxation delay = 5 - 8 s, NS = 8-32, mixing time (D8) = 300.00 ms; TD = 4096; increments = 512 - 1k;

2D- $^1\text{H}$ ,  $^1\text{H}$  COSY: Pulse program: cosygpqh; Relaxation delay = 5 - 8 s, NS = 8-32, TD = 4096; increments = 512 - 1k;

$^{13}\text{C}$  NMR: Pulse program: zgpg30; Relaxation delay = 2.00 s, Acquisition time = 0.80 s, SW = 270.0 ppm, TD = 64k, NS = 1k – 2k;

2D- $^1\text{H}$ ,  $^{13}\text{C}$  HSQC: Pulse program: hsqcedetgpsisp2.3; Relaxation delay = 4 - 8 s, NS = 8-32,  $^1J_{\text{XH}} = 145$  Hz; TD = 4096; increments = 512 - 1k;

2D- $^1\text{H}$ ,  $^{13}\text{C}$  HMBC: Pulse program: hmbcgpplndqf; Relaxation delay = 4 - 8 s, NS = 8-32,  $^1J_{\text{XH}} = 145$  Hz,  $J_{\text{XH}}(\text{long range}) = 10$  Hz; TD = 4096; increments = 512 - 1k;

2D- $^1\text{H}$ ,  $^{31}\text{P}$  HMBC: Pulse program: inv4gpplndqf; Relaxation delay = 4 - 8 s, NS = 8-32, TD = 4096; increments = 256 - 1k;

$^{15}\text{N}$  NMR: Pulse program: zg; Relaxation delay = 10.00 s, Acquisition time = 0.54 s, SW = 502.8 ppm, TD = 32k, NS = 256 – 2048;

2D- $^1\text{H}$ ,  $^{15}\text{N}$  HMBC: Pulse program: inv4gpplndqf; Relaxation delay = 5 - 8 s, NS = 16-32, delay for evolution of long range couplings (D6) = 20.00 ms; TD = 4096; increments = 128 - 512;

$^{19}\text{F}$ -NMR: Pulse program: zg30; Relaxation delay = 2 – 3 s, Acquisition time = 11.60 s, SW = 10.0 ppm, TD = 128k, NS = 8 – 64;

2D-<sup>1</sup>H, <sup>19</sup>F HOESY: Pulse program: hoesyph; Relaxation delay = 5 - 8 s, NS = 16-32, mixing time (D8) = 500.00 ms; TD = 4096; increments = 1k;

## 1D $^1\text{H}$ off-resonance $R_{1\rho}$

### Pulse Sequence

The recent reported 1D  $^1\text{H}$  off-resonance  $R_{1\rho}$  pulse sequence is adopted with slight modification for our measurement.<sup>6,7</sup>

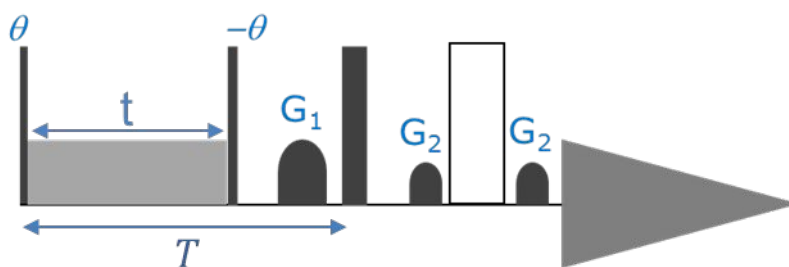

$$R_{1\rho} = -\frac{1}{T} \ln \frac{I}{I_0}$$

**Figure 1:** Applied pulse sequence and mathematical relation to measure  $R_{1\rho}$  experimentally. The applied angle ( $\theta$ ) is  $35^\circ$ . A spinlock period ( $t$ ) of 100 ms is applied. The filled (black) and unfilled rectangular pulses respectively indicate  $90^\circ$  and  $180^\circ$  hard pulses. The gradient pulses of  $G_1 = 70\%$  and  $G_2 = 40\%$  of the maximum were applied.  $I_0$  is the intensity without any spinlock period and  $I$  is the intensity with spinlock period measured over a multiple effective magnetic field.

### Parameter Optimization

The spinlock period ( $t$ ) was incremented in 10 ms steps with maximum spinlock power ( $\approx 20$  kHz). At each step, the temperature was monitored (sample heating can occur due to application of high intensity spinlock field over an extended time). Around 120 ms, temperature oscillation was observed. To avoid any influence of temperature changes on the measurement, the spinlock period of 100 ms was applied in all our measurements.

The normal relaxation period ( $T-t$ ) in the absence of the spinlock is tested for 3 delays (50 ms, 100 ms and 150 ms). For all three different relaxation periods ( $T-t$ ), we found similar exchange rates within the experimental errors. To minimize signal loss due to relaxation, ( $T-t$ ) of 50 ms was used in all our measurements.



## Method testing

To test the applicability of the  $R_{1\rho}$  method, we applied the above described pulse sequence with optimized parameters on the known peak in the spectrum (*para*-methyl protons of the hydrolyzed imine ketone part), which does not experience any chemical exchange process (on a ms- $\mu$ s timescale) and on the same proton for the CPA/imine complex which experiences chemical exchange. The measured rate for the hydrolyzed ketone showed a nearly straight line (no offset-Lorentzian decay with increasing effective field  $\omega_{\text{eff}}$ ), which was expected for non exchanging protons. For the same proton in the binary CPA/imine complex, an offset-Lorentzian decay was observed, which demonstrates the presence of chemical exchange on a ms- $\mu$ s timescale.

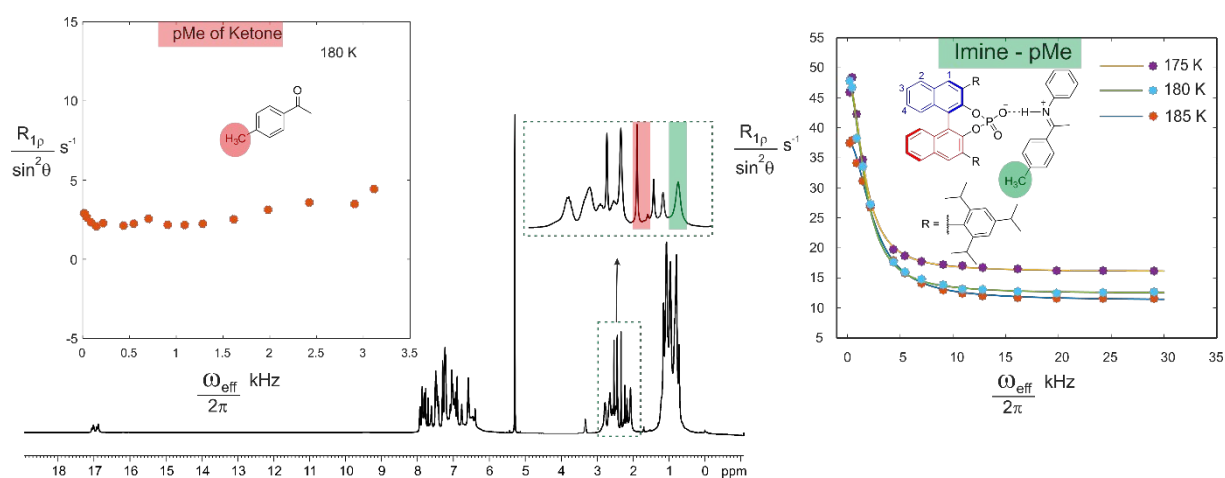

**Figure 2:** To test the method, we selected the proton peak of the *p*-methyl group in the hydrolyzed ketone moiety (red shaded) and the proton peak of the *p*-methyl imine in the TRIP/imine binary complex (green shaded) within the same sample (to maintain identical conditions). The hydrolyzed ketone does not undergo any chemical exchange on a ms- $\mu$ s time scale. The corresponding measured  $R_{1\rho}$  data at 180 K with incremental effective field showed a near horizontal line, proving the absence of chemical exchange (left side). On the other hand, the imine inside the catalyst undergoes  $E_{I1} \rightleftharpoons E_{I2}$  exchange and thus the corresponding  $R_{1\rho}$  data at 185, 180 and 175 K with incremental effective field showed offset-Lorentzian decays for the *p*-methyl protons in the TRIP/imine complex. This confirms the presence of chemical exchange process and hence validates our method for chemical exchange detection in ms- $\mu$ s range.

### Curve fitting

In order to analyze the  $R_{1\rho}$  measurements, the signal intensities (integrals) are determined for every effective field strength  $\omega_{\text{eff}}$  (i.e. every different spinlock power) and normalized to the reference integral (spinlock power = 0 W). Initially, to extract  $k_{\text{ex}}$ , the measured experimental points are curve fitted to the following theoretically described equation by using MATLAB (see literature for further details<sup>8</sup>).

$$\frac{R_{\text{eff}}}{\sin^2\theta} = R_2 - R_1 + \frac{(\Delta\omega)^2 P_A P_B \tau_{\text{ex}}}{(1 + \tau_{\text{ex}}^2 \omega_{\text{eff}}^2)} \quad (\text{Eq. 1})$$

Here  $R_2$  is the transverse relaxation rate constant

$R_1$  is the longitudinal relaxation rate constant

$\Phi = (\Delta\omega)^2 P_A P_B \tau_{\text{ex}}$  encodes both chemical shift difference and population of the minor ( $P_B$ ) and major ( $P_A$ ) exchange species

$\Phi$  and the average isotropic chemical shift  $\Omega$  (in ppm) are related by

$$\Phi = -\Omega^2 + a\Omega + b \quad (\text{Eq. 2})$$

Here,

$$a = 2\Omega_A - \Delta\omega$$

$$b = \Omega_A(\Delta\omega - \Omega_A)$$

These can be rearranged as

$$\Delta\omega = (a^2 + 4b)^{1/2}, \text{ and } \Omega_{A,B} = [a \pm (a^2 + 4b)^{1/2}]/2 \quad (\text{Eq. 3})$$

$\Phi$  and  $\Omega$  can be obtained experimentally at different temperatures. Assuming the chemical shift difference  $\Delta\omega$  between major (A) and minor (B) species is constant, one can calculate  $\Delta\omega$ . From  $\Delta\omega$  value and  $\Phi$  values, populations can be extractable.

### Directionality

For the chemical exchange between A and B, the exchange rate constant  $k$  is:  $k_{\text{ex}} = k_A + k_B$ . By using populations and  $k_{\text{ex}}$  one can extract rate constants  $k_A$  and  $k_B$  on both sides.

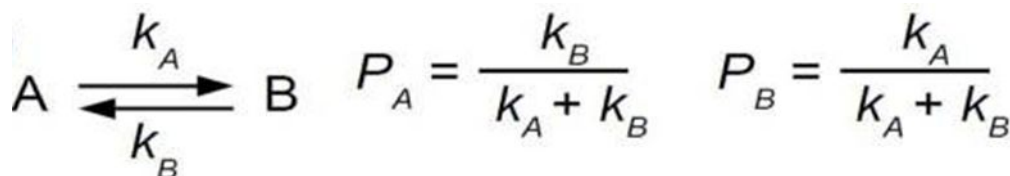

If a temperature independence within the varied range of 10 K is assumed, then the coefficients  $a$  and  $b$  can be determined by least squares optimization. Subsequently,  $\Delta\omega$  is calculated by  $\Delta\omega = (a^2 + 4b)^{1/2}$ , and  $\Omega_{A,B} = [a \pm ; (a^2 + 4b)^{1/2}]/2$ . Once  $\Delta\omega$  is known,  $P_A$ ,  $P_B$ ,  $k_A$  and  $k_B$  are obtained from  $\Phi_{\text{ex}}$  and  $k_{\text{ex}}$  at each temperature.

Hence, in order to separate the populations and chemical shift difference from the term  $\phi$ , it requires additional experimental  $R_{1\rho}$  measurements at more than one temperature. Therefore we measured  $R_{1\rho}$  experiments for each sample at two or three temperatures (185 K, 180 K and 175 K).

## Results of the $R_{1\rho}$ measurements

### TRIP/3

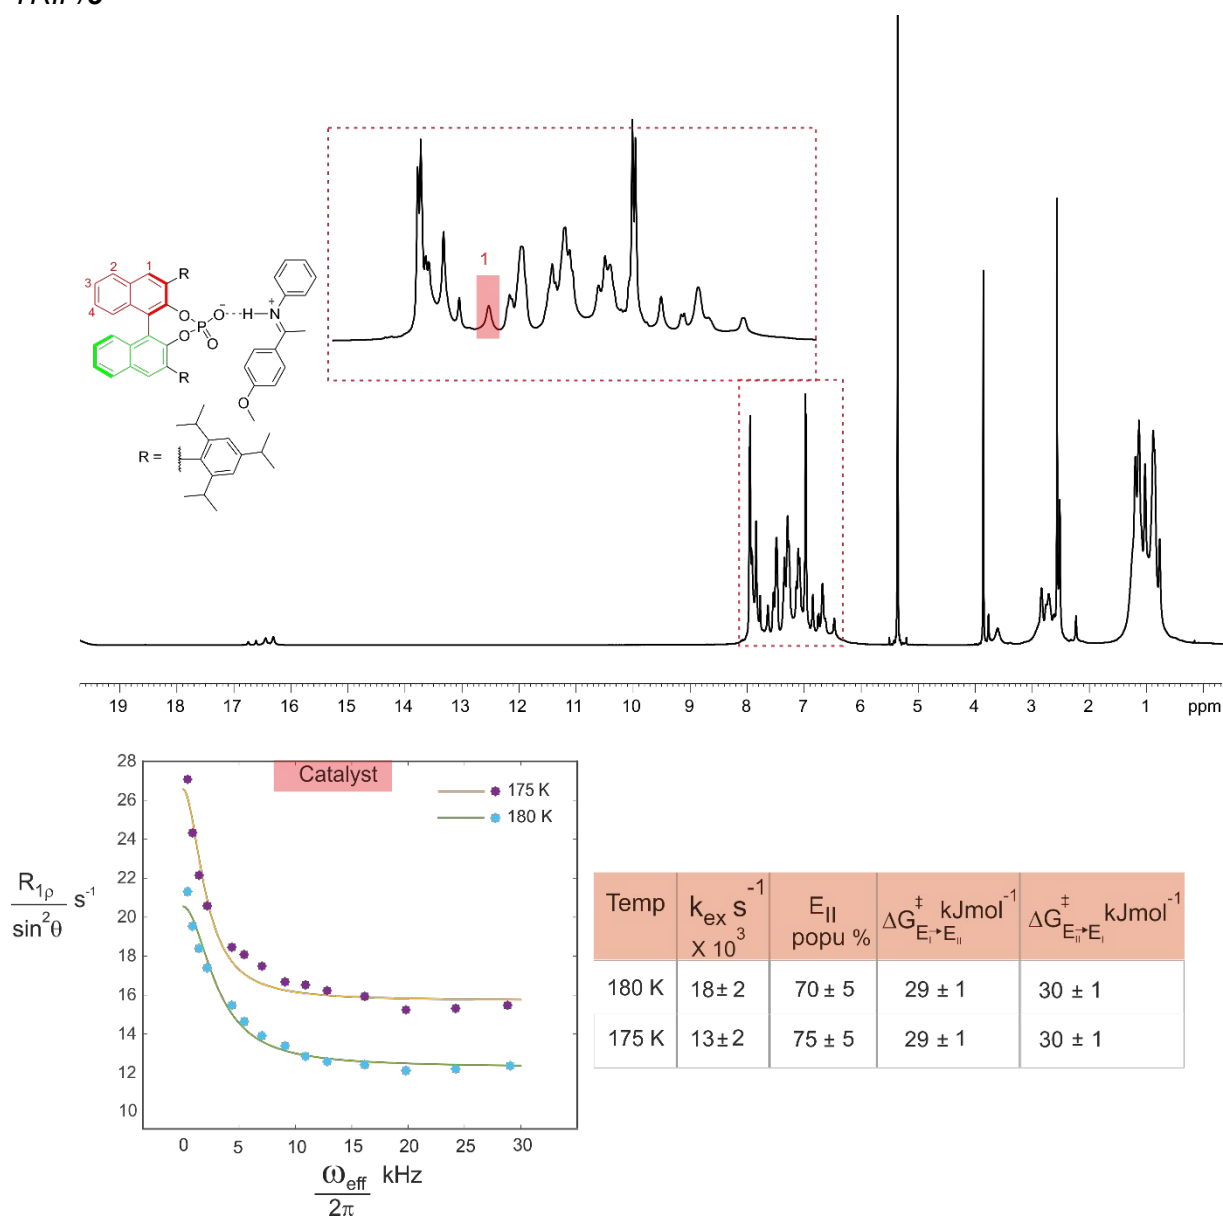

**Figure 3:**  $R_{1\rho}$  measurement for the TRIP/3 complex. The proton  $H_1$  of the catalyst (marked in the spectrum, red shaded) was selected as probe. The offset-Lorentzian decay indicates the

presence of chemical exchange ( $k_{\text{ex}} \approx 18000 \text{ s}^{-1}$  at 180 K). With experimental data obtained at two different temperatures, the populations and directionality were extracted.

### TRIP/2

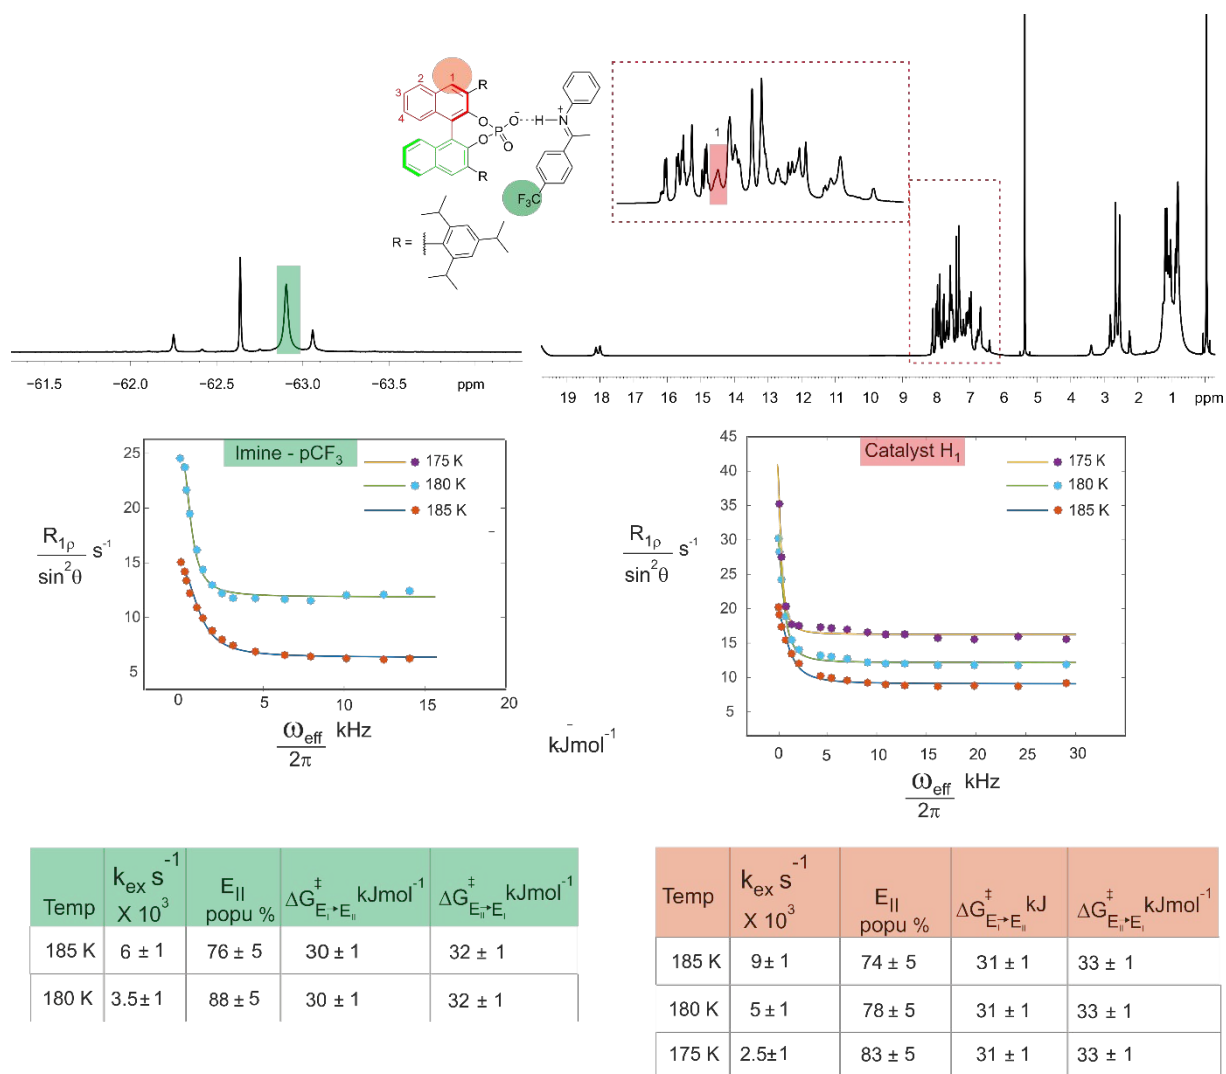

**Figure 4:**  $R_{1p}$  measurement for TRIP/2 complex. The proton  $H_1$  of the catalyst (shaded in red) and the fluorine signals of the imine- $\text{CF}_3$  group (shaded in green) were selected as probes. The offset-Lorentzian decay indicates presence of chemical exchange ( $k_{\text{ex}} \approx 3\text{-}5 \cdot 10^3 \text{ s}^{-1}$  at 180 K). With experimental data obtained at three different temperatures, the populations and directionality were extracted.

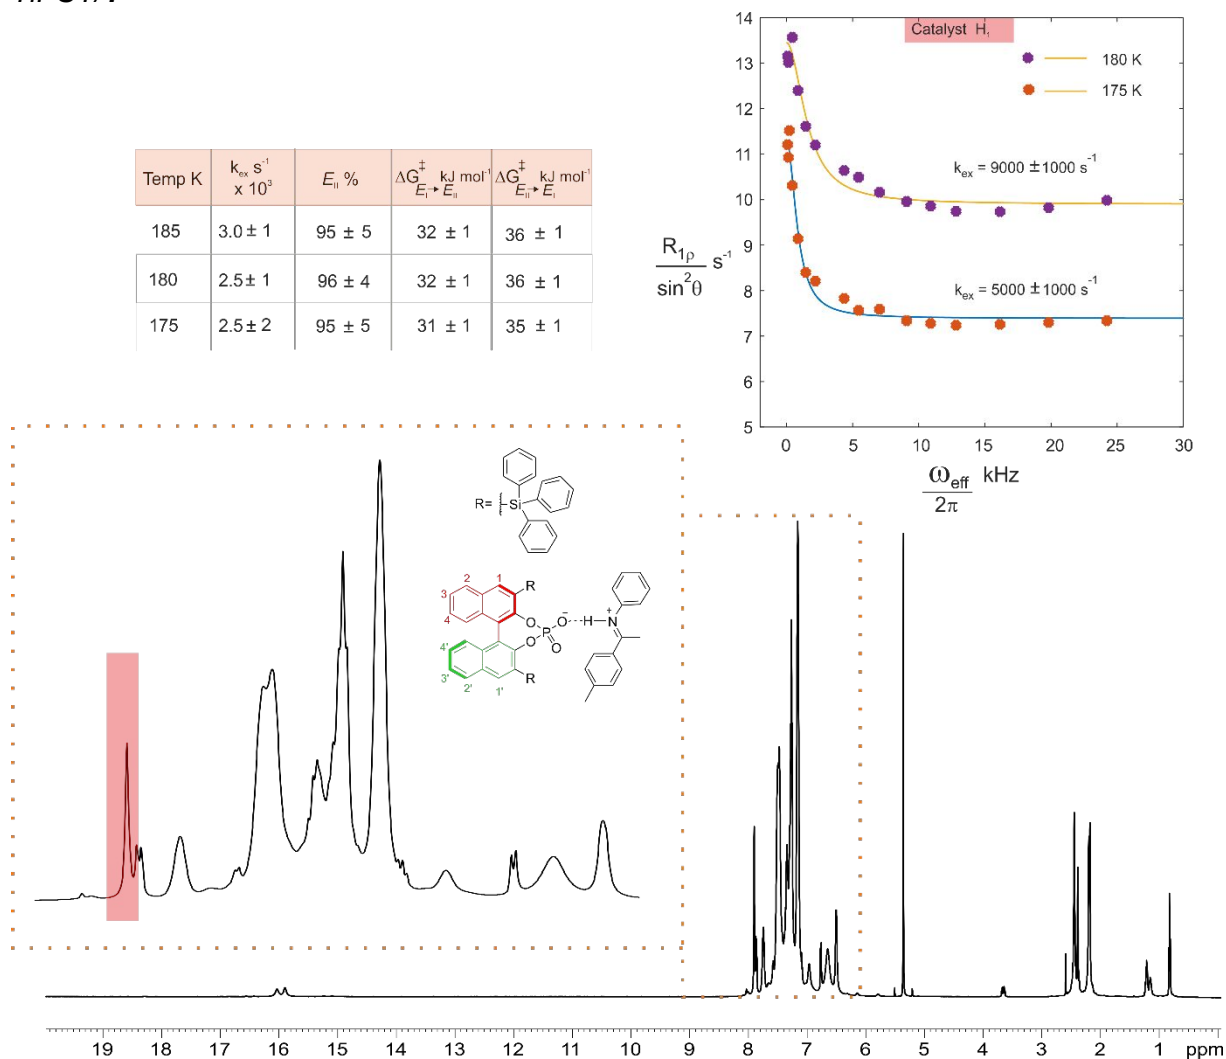

**Figure 5:**  $R_{1\rho}$  measurement for TiPSY/1 complex, (to avoid signal overlap, the sample was prepared with nearly exclusive population of the  $E$ -complex; see above for sample preparation). The proton  $H_1$  of the catalyst (shaded in red) was selected as probe. The offset-Lorentzian decay indicates presence of chemical exchange ( $k_{\text{ex}} \approx 9 \text{ ks}^{-1}$  at 180 K).

## TRIM/2 and TRIM/3

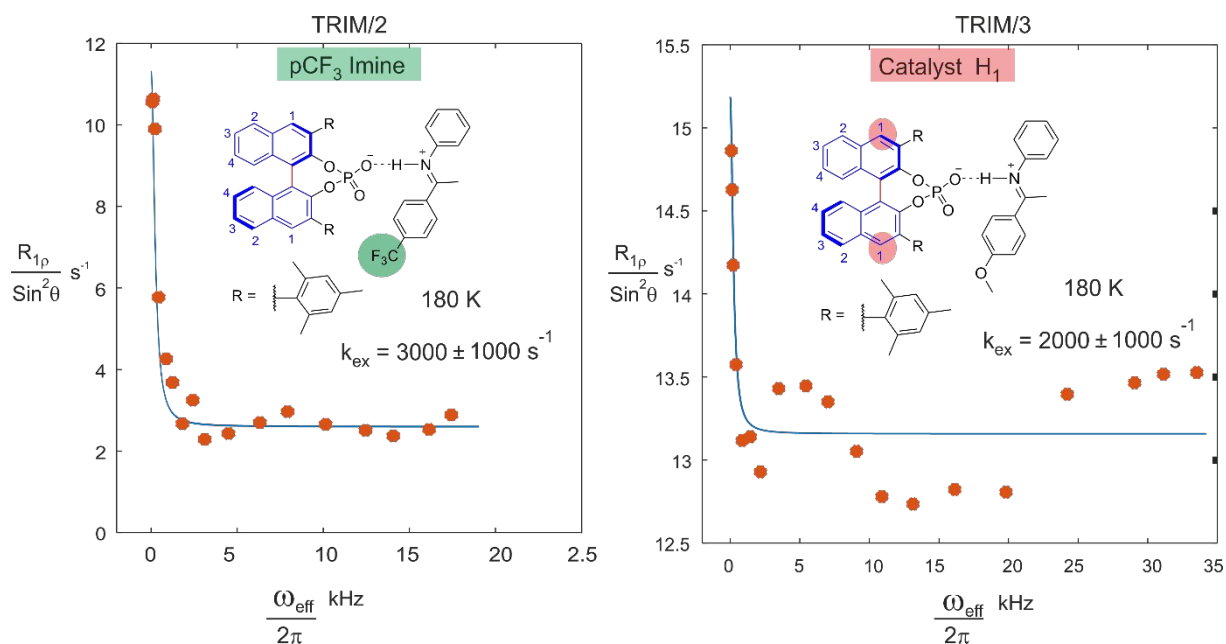

**Figure 6:**  $R_{1p}$  measurements for TRIM/2 and TRIM/3 complexes. For TRIM/2, the CF<sub>3</sub> group of the imine was used as a probe (shaded in green) and for TRIM/3 the proton H<sub>1</sub> of the catalyst (shaded in red) was selected as probe. The offset-Lorentzian decay in both system indicates the presence of chemical exchange ( $k_{\text{ex}} \approx 2000\text{-}3000 \text{ s}^{-1}$  at 180 K).

For TRIM/2 and TRIM/3, the offset-Lorentzian decay fit does not match the experimental decay as precisely as for the other systems. Hence, a larger experimental error is expected. However, the  $R_{1p}$  measurements for TRIM/2 and TRIM/3 complexes indicate, that similar exchange rates ( $k_{\text{ex}} \approx 2000\text{-}3000 \text{ s}^{-1}$  at 180 K) are obtained for TRIM/1-3 regardless of the hydrogen bond strength.

## NMR-Structural analysis of CPA/imine complexes

The investigated complexes TRIP/1-3, TiPSY/1 and TRIM/1-3 were already described in the previous work.<sup>2,9</sup> The NMR-structural analysis of TRIM/4 is described below. In addition, the backbone splitting of TiPSY/1 is discussed in detail below.

### Chemical Shift assignment of TRIM/4

The <sup>1</sup>H (black) and <sup>13</sup>C (green) chemical shifts (in ppm) of all investigated complexes were assigned with standard 2D NMR experiments (<sup>1</sup>H,<sup>1</sup>H COSY, <sup>1</sup>H,<sup>1</sup>H TOCSY, <sup>1</sup>H,<sup>1</sup>H NOESY, <sup>1</sup>H,<sup>13</sup>C HSQC, <sup>1</sup>H,<sup>13</sup>C HMBC) at 180 K. The <sup>31</sup>P (orange) chemical shift (in ppm) was assigned by <sup>1</sup>H,<sup>31</sup>P HMBC. Due to signal overlap and lacking resolution and intensity of 2D correlations, not all signals could be assigned.

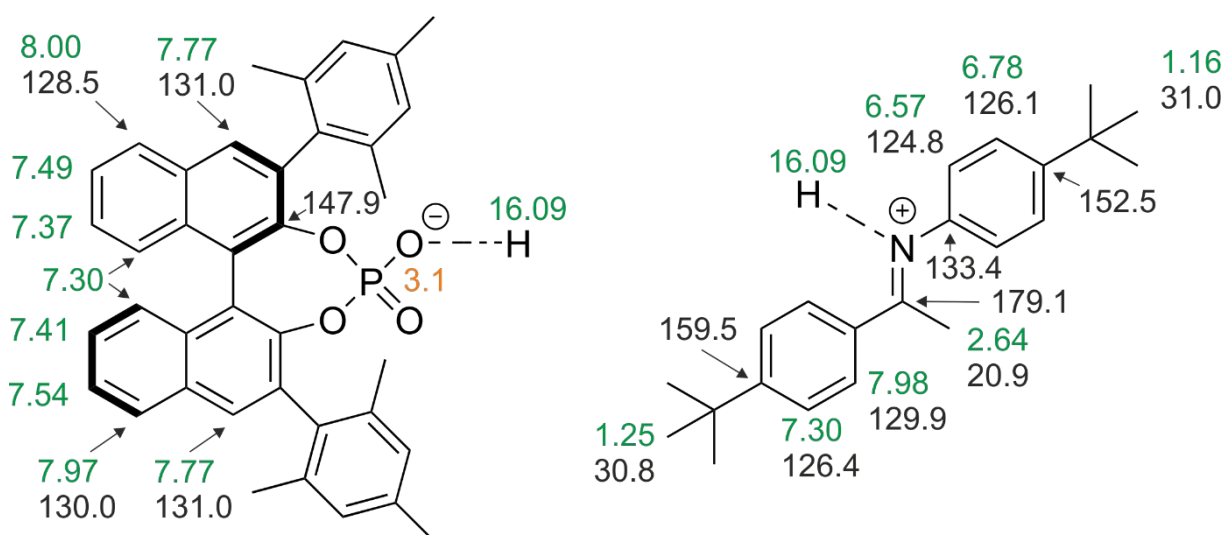

In accordance with our previous analysis of hydrogen bond strengths,<sup>1</sup> the <sup>1</sup>H chemical shift of the hydrogen bond strength reflects the H-bond strength (in our system, higher chemical shifts correlate with stronger H-bonds). Hence, the H-bond strength of TRIM/4E (16.09 ppm) is in between TRIM/1E (16.26 ppm) and TRIM/3E (15.80 ppm).<sup>9</sup>

### Identification of Type I E and Type II E

Analogous to our previous work,<sup>2,9</sup> for the *Type I E* structure, the *tert*-butyl group of the ketone part of the imine (marked in blue) is placed above the BINOL backbone. The blue NOE cross signals A and B to the Naphthyl backbone reveal the presence of the *Type I E* structure (Figure 7) for TRIM/4E. The NOE cross signal D (black) is a result of overlapping NOE signals between the *tert*-butyl group and the naphthyl backbone and the *tert*-butyl group and the attached

phenyl ring (backbone: 8.00 ppm, phenyl ring of imine: 7.98 ppm). For the *Type II E* structure, the tert-butyl group of the aniline part of the imine is placed above the BINOL backbone and thus the red NOE cross signals A-D reveal the presence of the *Type II E* structure.

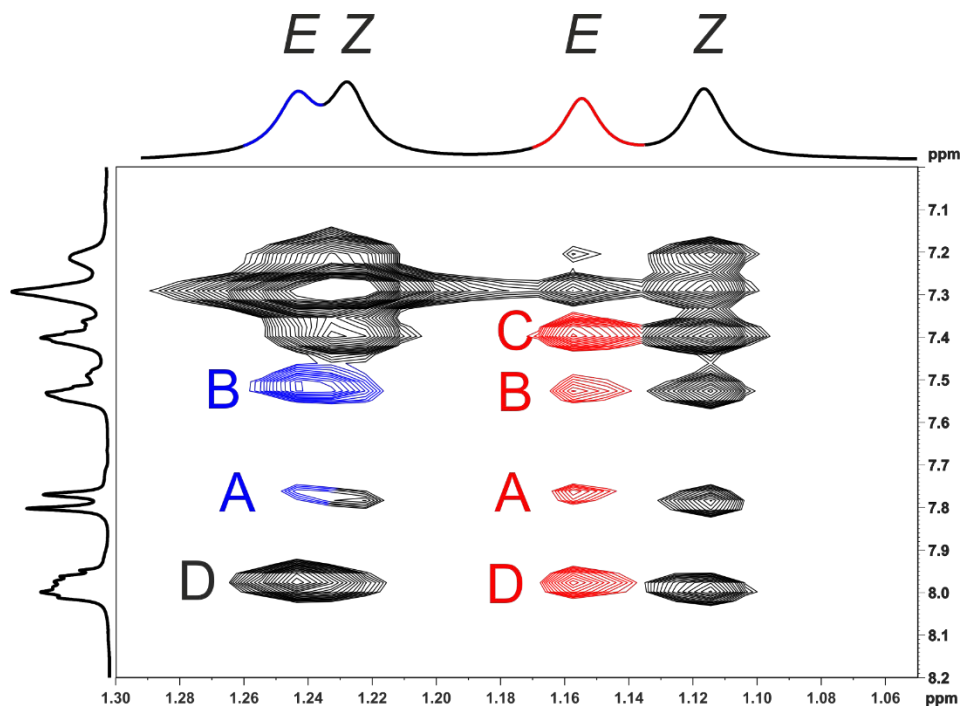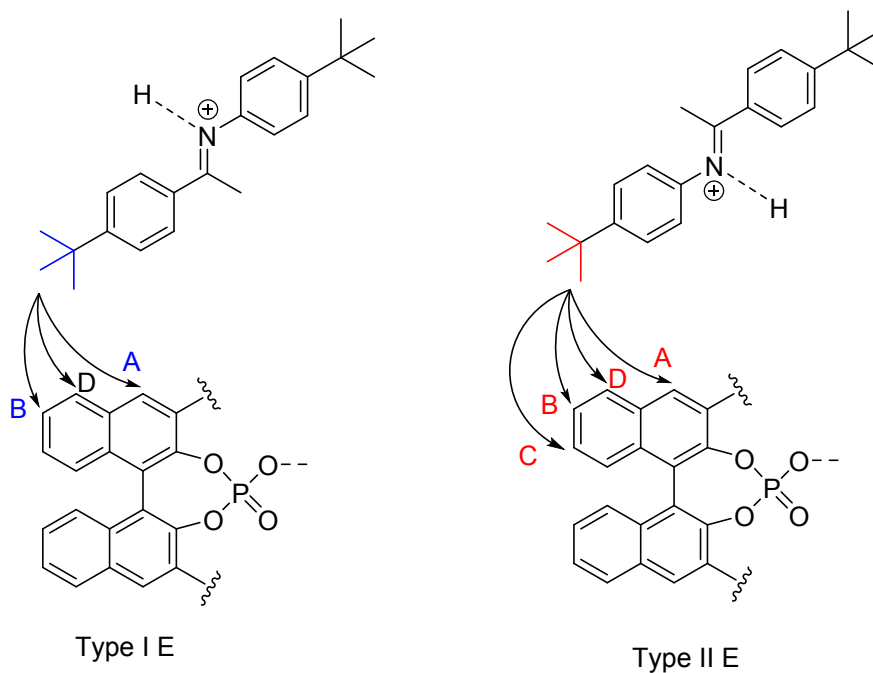

**Figure 7:** Excerpt of the  $^1\text{H},^1\text{H}$  NOESY spectrum of TRIM/4 at 180 K and 600 MHz (100 mM sample) in  $\text{CD}_2\text{Cl}_2$ . The blue NOE cross signals indicate the presence of the *Type I E* structure, while the red NOE signals indicate the presence of the *Type II E* structure.



## DOSY measurements of TRIM/4

To prove, that the observed species in TRIM/4 are monomers of the binary complexes, DOSY measurements (Diffusion ordered spectroscopy) were performed to derive the molecular radii of the present species.

The DOSY measurements were performed with the convection suppressing DSTE (double stimulated echo) pulse sequence developed by Jerschow and Müller in a pseudo 2D mode.<sup>10</sup> TMS was used to reference the viscosity of the solvent at 180 K. The diffusion time delay was set to 45 ms. The gradient pulse lengths (p16, SMSQ10.100 pulse shape) were optimized for each species to give a sigmoidal signal decay for varying gradient strengths. Optimal pulse lengths of 3.0 ms and 6.0 ms were found for TMS and TRIM/4, respectively. For each species, twenty spectra with linear varying gradient strength of 5% - 95% have been measured. The used probe signals for the analysis are listed in table 1. The signal intensities of the respective groups were analyzed as a function of the gradient strength by Bruker TopSpin 3.2 software T1/T2 relaxation package by employing the Stejskal-Tanner equation.<sup>11</sup> No line broadening occurred for increasing gradient strength. The sigmoidal fit provided the translational self-diffusion coefficients  $D_i$  listed in Table 1. The molecular radii were derived by the Stokes-Einstein equation<sup>12</sup> using Chens correction.<sup>13</sup>

$$D_i = \frac{k_B T}{6\pi\eta r_H} * (1 + 0.695 * (\frac{r_{solv}}{r_H})^{2.234}) \quad (Eq. 4)$$

$D_i$  is the self-diffusion coefficient derived by the measurement,  $\eta$  is the viscosity of the solvent,  $r_H$  is the hydrodynamic radius of the observed molecule and  $r_{solv}$  the radius of the solvent. No form factor correction was applied. The viscosity was determined by measuring the diffusion coefficient of the reference tetramethylsilane (TMS) and solving the equation for  $\eta$  with the literature value<sup>14</sup> of the radius of 2.96 Å. The solvent radius of  $CD_2Cl_2$  (2.46 Å) was taken from the reference.<sup>15</sup>

**Table 1:** Probe signals, measured diffusion coefficients and derived molecular radii for TRIM/5.

| Entry | Species | p16 [ms] | Observed signal [ppm] | $D_i$ [ $m^2/s$ ] · 10 <sup>-12</sup> | Averaged | $r_H$ [Å] |
|-------|---------|----------|-----------------------|---------------------------------------|----------|-----------|
| 1     | TMS     | 3.10     | 0.00                  | 21.32                                 |          |           |
| 2     | TRIM/4E | 6.00     | 1.16                  | 4.76                                  |          |           |
| 3     | TRIM/4E | 6.00     | 2.64                  | 4.80                                  | 4.69     | 9.54      |
| 4     | TRIM/4E | 6.00     | 7.77                  | 4.50                                  |          |           |

The derived molecular radius (9.54 Å) is similar to the one reported previously for TRIM monomers.<sup>9</sup> Thus, the DOSY measurements showed, that the species investigated by the  $R_{1\rho}$  measurement is the binary TRIM/4E complex.

### *Estimation of the rotational correlation time of binary CPA/imine complexes*

A general rotational correlation time of 10-50 ns was estimated for the investigated binary complexes of chiral phosphoric acids and imines with their hydration shell. Stokes Law (Eq. 5) was used to calculate the rotational correlation time based on the results of the DOSY measurements of TRIM/**4E**.

$$\tau_c = \frac{4\pi\eta r^3}{3kT} \quad (\text{Eq. 5})$$

The radius of the binary complex of TRIM/**4** with its hydration shell was determined by DOSY measurements (see respective chapter) and a radius of 9.54 Å was determined for the complex with its hydration shell. The viscosity ( $3.05 \cdot 10^{-2} \text{ kg m}^{-1} \text{ s}^{-1}$ ) of the solution at 180 K was determined by Equation 4 based on the DOSY measurement on TMS. A rotational correlation time of 44.6 ns was calculated for TRIM/**4E** with its hydration shell. Given the bulkiness of the two tert-butyl substituents of imine **4**, it is expected that the other investigated complexes have smaller radii, resulting in smaller rotational correlation times. Hence, a general rotational correlation time around 10 – 50 ns was estimated.

## TiPSY/1

In the TiPSY/1 complex, the backbone splitting could not be resolved at 180 K and 600 MHz in  $\text{CD}_2\text{Cl}_2$  (see figure). However, in our previous investigations we observed, that the backbone splitting in TiPSY complexes is very small and could often not be resolved sufficiently (see SI of literature).<sup>9</sup> Goodman *et al.* demonstrated, that the binding pocket for TiPSY is significantly smaller than for TRIP (no rotation possible).<sup>16</sup> The biggest binding pocket for the investigated CPAs was determined for TRIM (rotation possible). Hence, a rotation of the imine inside the binding pocket of TiPSY can be excluded, even if the backbone splitting can not be resolved sufficiently.

The sample was prepared with an exclusive population of the *E*-imine. To achieve that, the sample was prepared according to the general procedure described above. However, before adding the solvent, the NMR-tube with TiPSY and **1** was cooled to  $-90\text{ }^\circ\text{C}$  in acetone/liquid  $\text{N}_2$  and the precooled solvent was added to the tube. The low temperature suppressed *E*→*Z* isomerization of the imine.

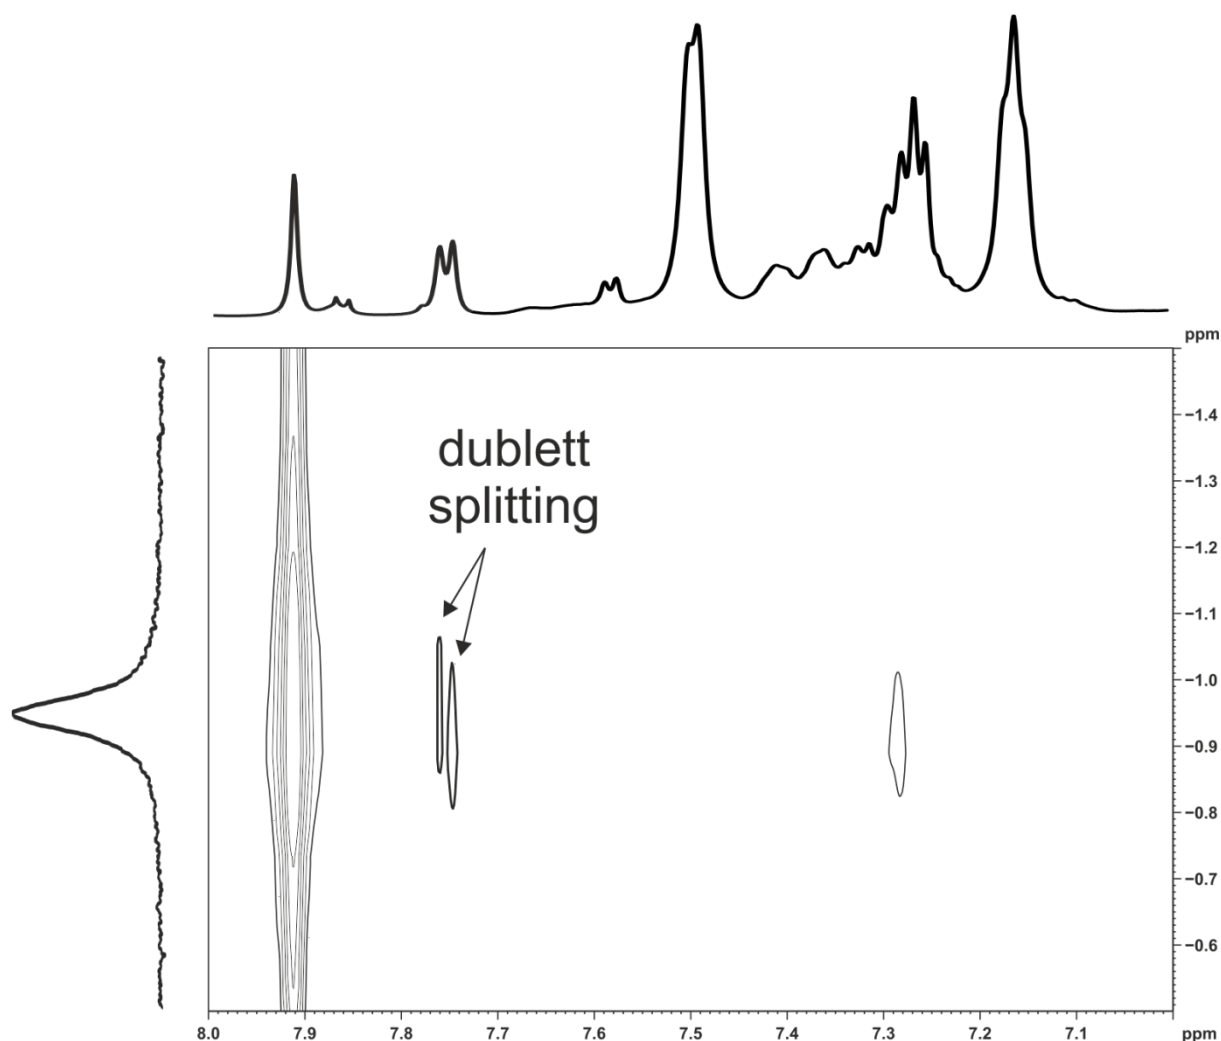

**Figure 8:** Excerpt of the  $^1\text{H}$ ,  $^{31}\text{P}$  HMBC spectrum of TiPSY/1 (*E*-only, 25 mM, TiPSY:**1** = 1:1) at 180 K and 600 MHz in  $\text{CD}_2\text{Cl}_2$ . The sample was prepared with an exclusive population of *E*-imine species.

## Exchange with free imines

Typically, in 1:1 complexes of TRIP, TRIM and TiPSY, the complexation of the imine was incomplete ( $\approx 25\%$  free imine present). Thus, for complexes with imines **1-3**, the assignment of the free imines was done for the CPA/imine samples. For imine **4**, a NMR sample with the imine only (50 mM,  $\text{CD}_2\text{Cl}_2$ , 180 K and 600 MHz) was measured and compared to the chemical shifts in the CPA/**4** sample. For TRIM/**4**, no free imine was observed in the binary complex sample.

As the free imines **1-4** gave chemical shifts well separated from the respective CPA/E-imine complexes (see figure 9 for free imines and assignments of the binary complex in literature<sup>2,9</sup>), the exchange between free and complexed imine is slow on the NMR time scale. Thus, the exchange pathway via dissociation and re-association causing averaging of the BINOL backbone can be excluded to significantly contribute to the measured exchange rates in the  $R_{1\rho}$  measurements.

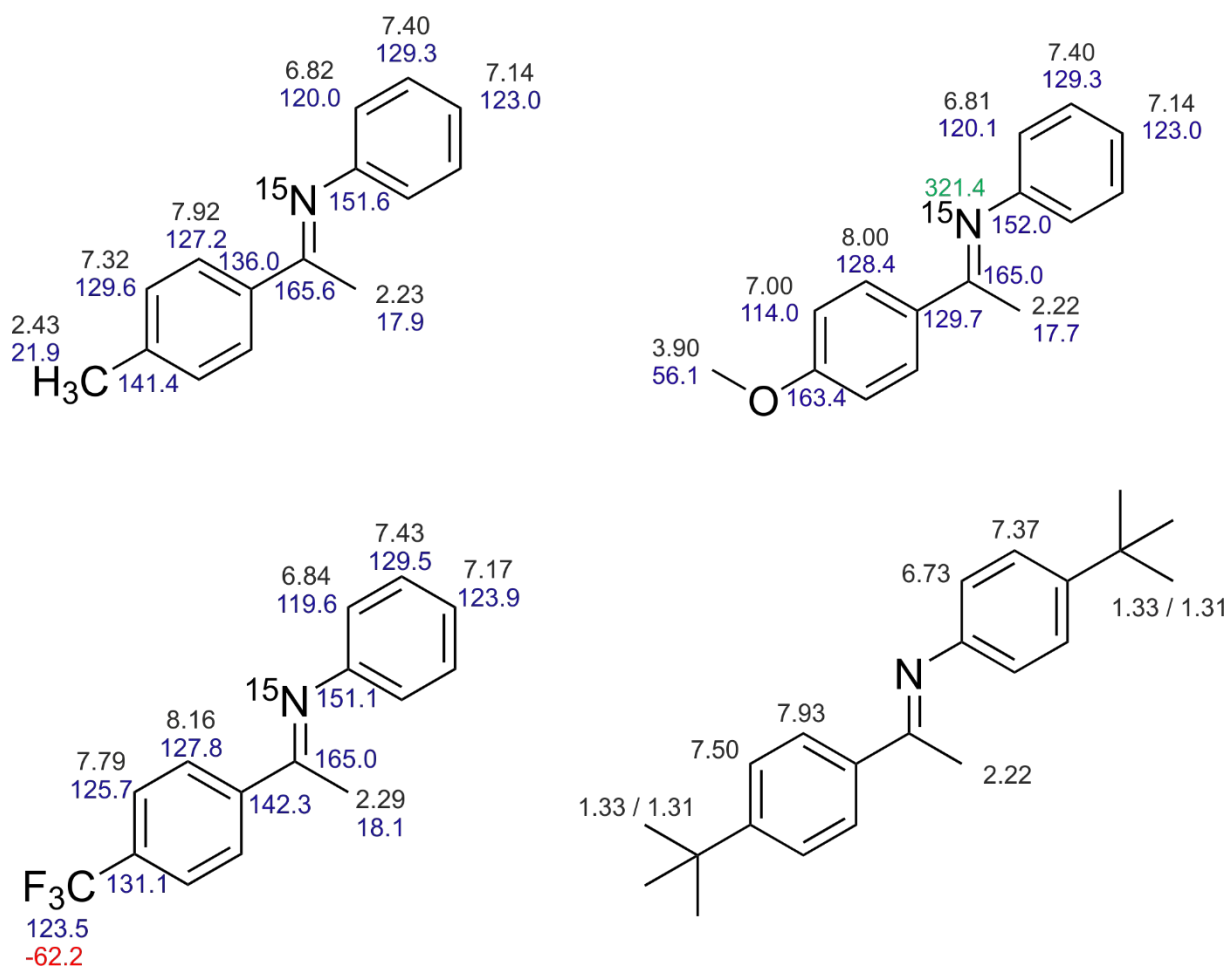

Figure 9: Chemical shift assignment of the free imines **1-4** at 180 K in  $\text{CD}_2\text{Cl}_2$ .

### Additional fitting of TRIM/1E

Due to the strong signal decay within the first few percent of the horizontal axis for TRIM/1E (Figure 6B in the manuscript), fewer data points are in the decay region relevant for the fit, which could affect the quality of the fit and thus the precision of the extracted rate. However, the fit curves for lower ( $500 \text{ s}^{-1}$ ) and higher ( $10\,000 \text{ s}^{-1}$ ) exchange rates as the optimized one ( $2500 \text{ s}^{-1}$ ) significantly deviate from the data set (Figure 10).

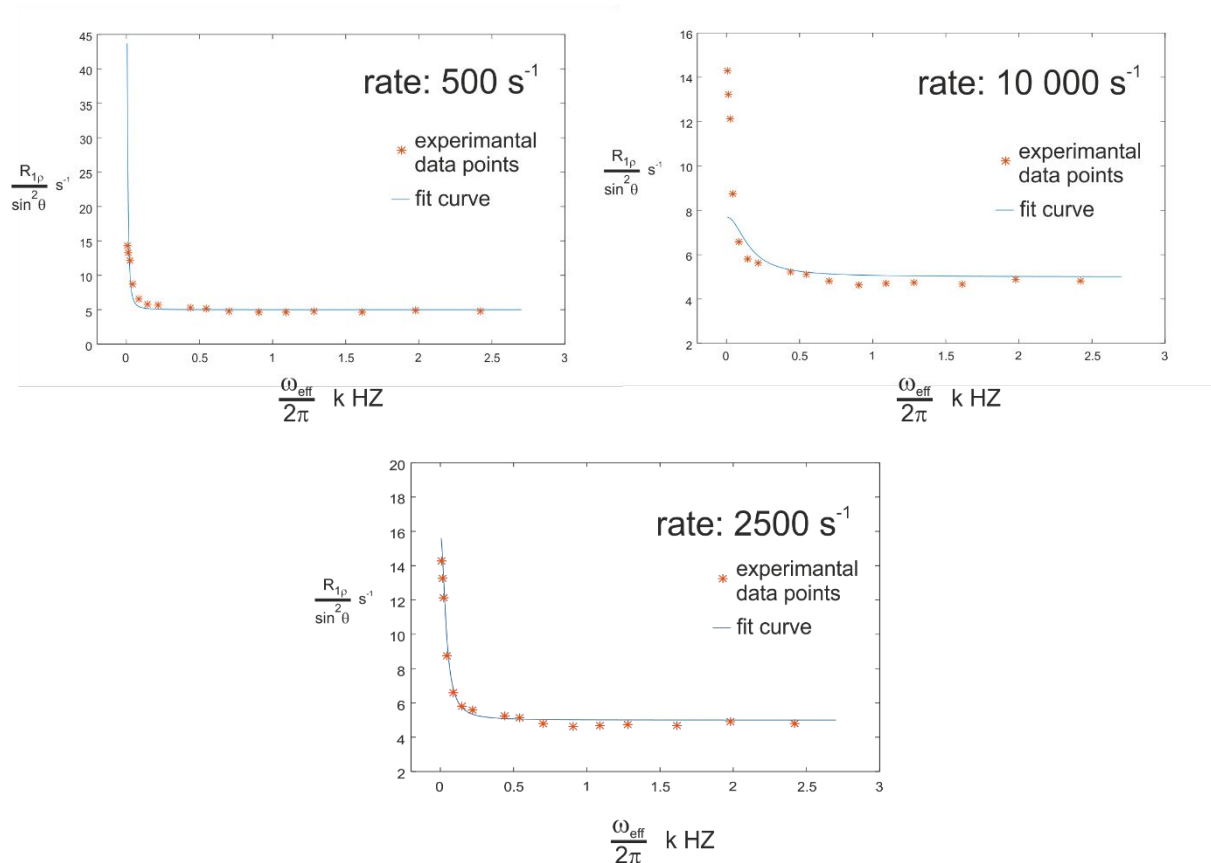

Figure 10: Additional curve fitting for the signal decay of TRIM/1E with different exchange rates at a concentration of 5 mM. The determined exchange rate of  $2500 \text{ s}^{-1}$  fits the data set best, while lower or higher exchange rates result in a significant offset. Other parameters, e.g. the population of *E*-I and *E*-II were not changed.

In addition, a TRIM/1E sample at different concentration (0.25 mM) was measured with more  $\omega_{\text{eff}}$  increments. The extracted exchange rate of  $2500 \text{ s}^{-1}$  is identical to the previous one and the fit for lower or higher exchange rates does not match the data set (Figure 11).

Hence, the quality of the fit for TRIM/1E is adequately precise to reveal, that the exchange rate for TRIM/1E is significantly lower than for TRIP/1E ( $\approx 10\,000 \text{ s}^{-1}$ ).

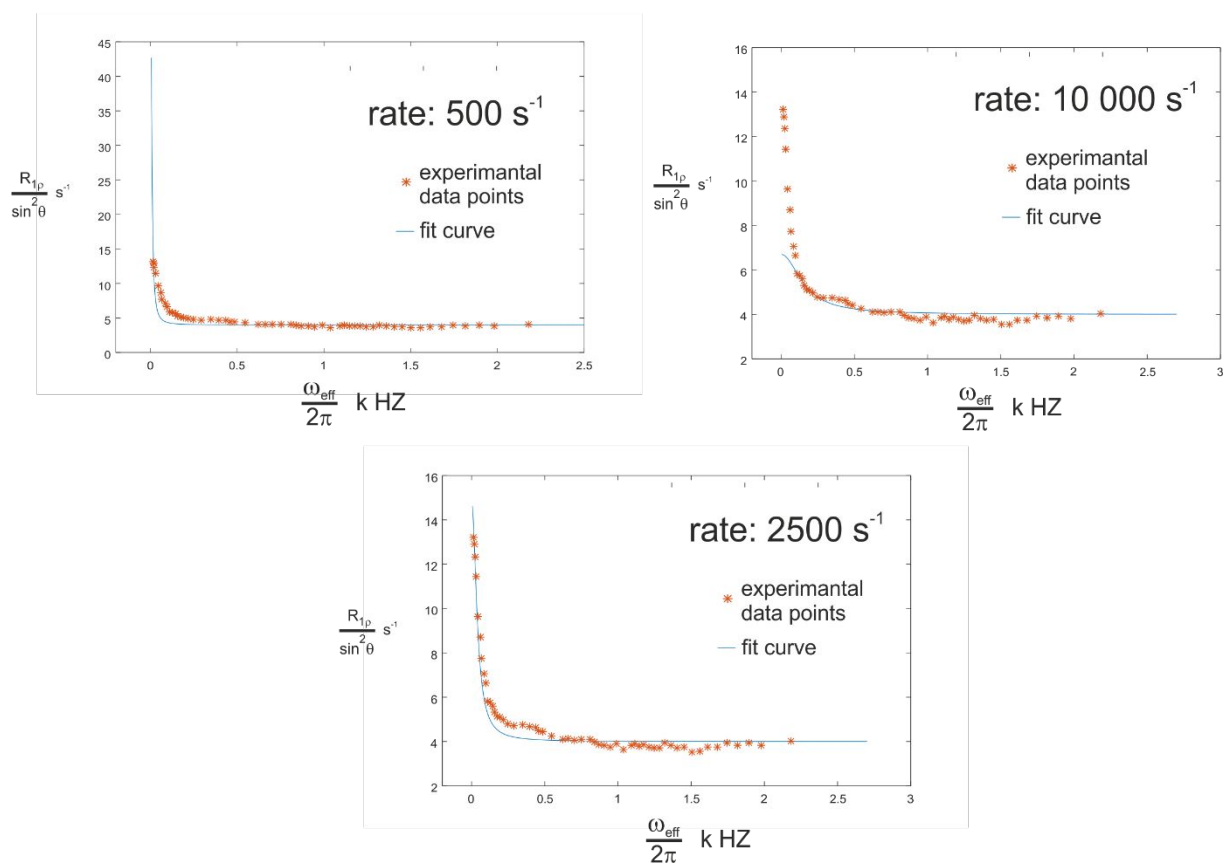

Figure 10: Additional curve fitting for the signal decay of TRIM/1E with different exchange rates at a concentration of 0.25 mM and additional  $\omega_{\text{eff}}$  increments. The determined exchange rate of 2500 s<sup>-1</sup> fits the data set best, while lower or higher exchange rates result in a significant offset. Other parameters, e.g. the population of E-I and E-II were not changed.

## Computational Details

All structures were optimized at TPSS/def2-SVP<sup>[17]</sup> level of theory using D3<sup>[18]</sup> correction in continuum of CH<sub>2</sub>Cl<sub>2</sub> (SMD<sup>[19]</sup>). The dielectric constant was adapted to 16.20 to mimic low temperature condition in the experiment. Vibrational and thermochemical analyses were performed at the same level of theory as the geometry optimization. Subsequently, single point calculations at SCS-MP2/CBS<sup>[20]</sup> level of theory were conducted. Def2-SVP and def2-TZVP basis sets were used for extrapolation to approach complete basis set. Solvent and thermochemical corrections were added to the single point energy. Software used for the geometry optimization, frequency analysis and solvent correction was Gaussian 09 version D.01.<sup>[21]</sup> For single point calculation, ORCA 4.1.1 was used.<sup>[22]</sup> Constant temperature (NVT) molecular dynamic was done using semi-empirical xtb software in DCM.<sup>[23]</sup>

### Extrapolation procedure

The CBS basis set extrapolation proceeds under the two point extrapolation procedure as in implemented in ORCA 4.1.1 with the basis set Def2-SVP and Def2-TZVP.

$$E_{\text{SCF}}^X = E_{\text{SCF}}^{\infty} + Ae^{-\alpha\sqrt{X}}$$

$$E_{\text{corr,MP2}}^{\infty} = \frac{X^{\beta} E_{\text{corr,MP2}}^X - (X - 1)^{\beta} E_{\text{corr,MP2}}^{X-1}}{X^{\beta} - (X - 1)^{\beta}}$$

$$E_{\text{MP2}}^{\infty} = E_{\text{corr,MP2}}^{\infty} + E_{\text{SCF}}^{\infty}$$

### TRIP/1E Type III.1 and E-III.2 structures (most stable conformations)

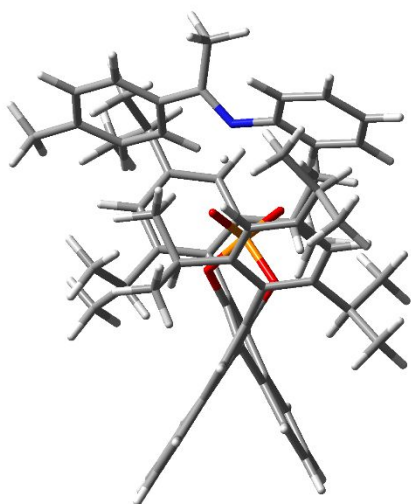

Type E-III.1

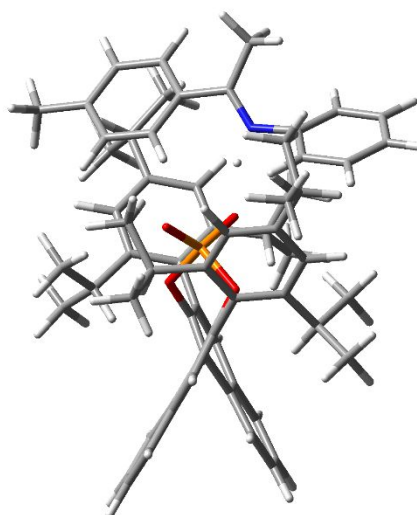

Type E-III.2

### *xtb-MD of TRIP/1E binary complex at 370 K*

MD of TRIP/1E complex shows the exchange of E-II and E-I conformations via tilting and switching. The E-II conformation is marked by the close contact between C134 and H10, while the E-I conformation shows close contact between C140 and H25. No rotation is observed during a simulation of 4000 ps at 300 K to 370 K, i.e. C134 never meets H25 or C140 never meets H10. Beyond this temperature, dissociation of complex is observed.

**Distance trajectory between atom C140 and atom H25**

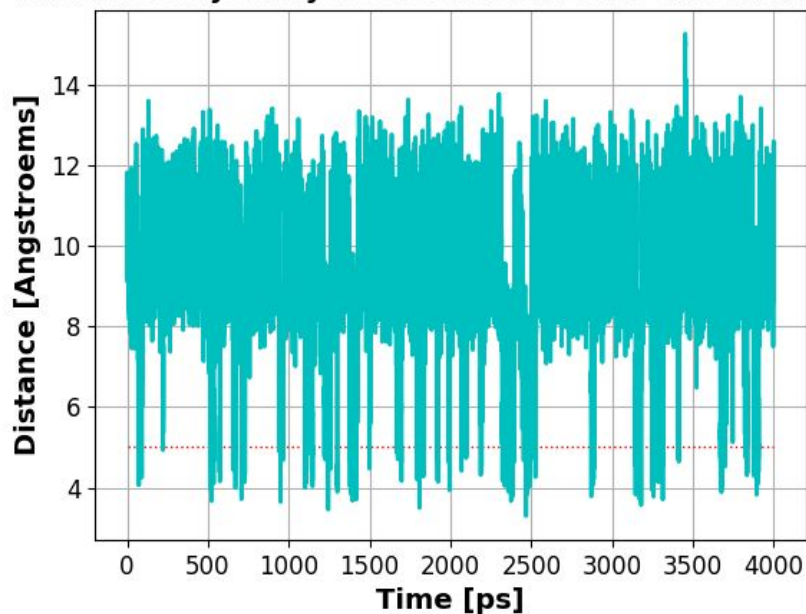

**Distance trajectory between atom C140 and atom H10**

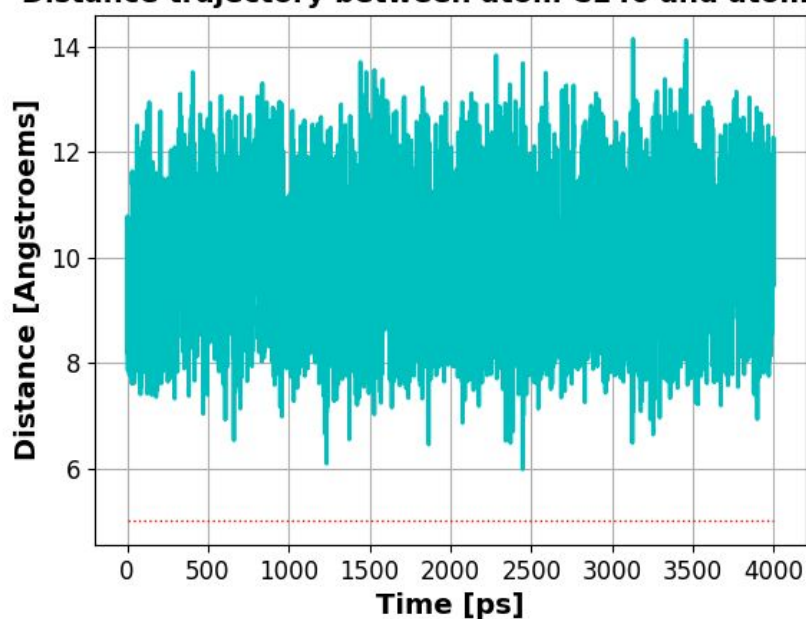



**Distance trajectory between atom C134 and atom H25**

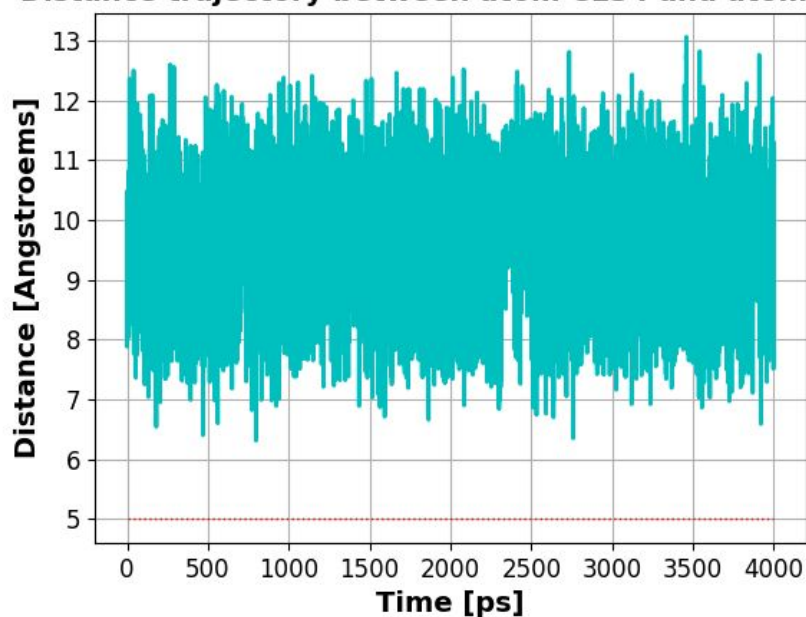

**Distance trajectory between atom C134 and atom H10**

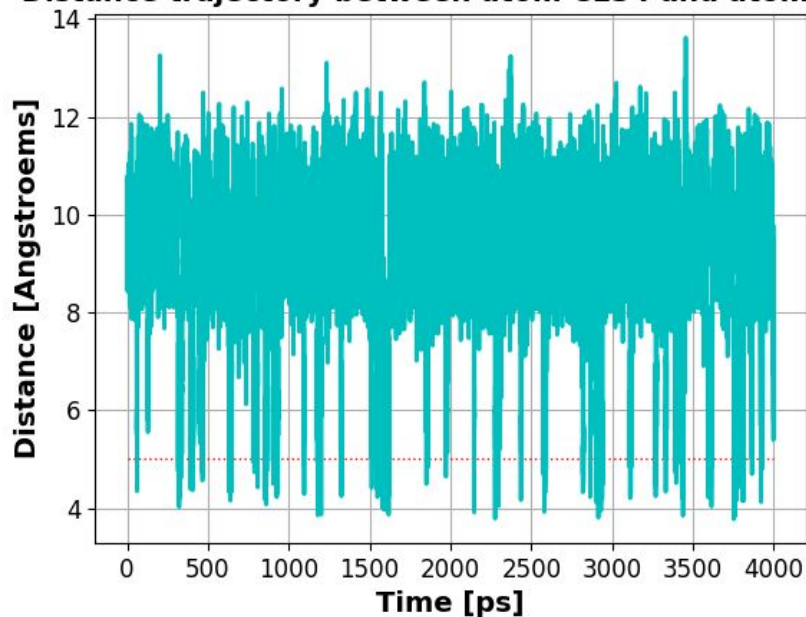

**Optimized Geometries**

**TRIM/1E Type I**

```
1\1\GINC-WORKER0\FOpt\RTSPSS\def2SVP\C53H48N1O4P1\JHIOE\24-Apr-2018
\0\#p tpsstps\def2svp empiricaldispersion=gd3 int=ultrafine opt scrf
=(smd,solvent=ch2cl2,read)\title\0,1\P,-0.1297143417,-0.4860433703,-
1.1839383304\O,-1.4175075558,0.5618941922,-1.4320413577\O,0.6889832102
,0.3763631976,0.0168282895\O,0.6300817555,-0.5399021282,-2.4784978792\
O,-0.5766080585,-1.7420153175,-0.4359277394\C,-1.446100498,2.147809437
,0.3711360845\C,-2.0698317941,1.122837238,-0.3502138217\C,-3.395018365
8,0.6663965667,-0.0681477603\C,-4.0703770977,1.2454430496,0.9985929916
\H,-5.095082782,0.9299435094,1.2232029452\C,-3.4593497944,2.2287931273
,1.8282185621\C,-2.1205478813,2.6764874421,1.5309470667\C,-1.502671696
6,3.5956395341,2.4329780968\H,-0.4706962922,3.9085577634,2.251357641\C
```

-.2.1840971756,4.0819139807,3.5389827427H,-1.6850717191,4.7804794202,  
4.2194778391C,-3.5190578898,3.6730083748,3.8040883989H,-4.0466914589  
4.0672317544,4.679316788C,-4.1381357835,2.7585716694,2.9673759161H,  
-5.1579812303,2.4147168377,3.1741719223C,-0.0995474827,2.6345132883,-  
0.0476174044C,0.9455071297,1.7164195775,-0.1873343455C,2.2926672419,  
2.1001225065,-0.4723187204C,2.558703778,3.4483819763,-0.6657499207H,  
3.5849117489,3.7741013745,-0.8683863455C,1.5225638135,4.4269654309,-0  
.627942795C,0.1688315104,4.0227443182,-0.3306877178C,-0.8544115593,5  
.0185025682,-0.3633523236H,-1.891720726,4.7236493662,-0.1814759087C,  
-0.5547814947,6.3456273979,-0.6331615051H,-1.3588983494,7.0894174279,  
-0.6571408924C,0.7839495245,6.7474855465,-0.8872017123H,1.0082027204  
,7.7998634367,-1.092917887C,1.798284324,5.8032516275,-0.889462277H,2  
.8323097674,6.0967771622,-1.1038106254C,-0.8573168791,-0.0871264197,4  
.830477067C,0.3250076425,-0.6640802772,5.339846067H,0.5983745847,-0.  
4987194234,6.3877175012C,1.1592184004,-1.4389797141,4.531247063H,2.0  
63978865,-1.8641784067,4.9725342634C,0.8369510599,-1.6781246632,3.170  
7619493C,-0.3607975558,-1.1104431398,2.6642891292H,-0.6471200511,-1.  
2563078529,1.6193677373C,-1.1818764103,-0.3336673895,3.4772889235H,-  
2.0910080112,0.1022022382,3.050863107C,1.7346779162,-2.4877720368,2.3  
367466851C,3.0307061219,-2.9840704286,2.9092756852H,3.7204914907,-3.  
3197061151,2.1236646323H,2.8474153916,-3.8258644017,3.6006465217H,3.  
510628279,-2.179611337,3.4868696705H,1.4180260578,-2.7627175612,1.084  
0668107H,0.5664142926,-2.31860371,0.6154507535C,2.1389962502,-3.6123  
512175,0.1823560853C,2.4359775179,-3.1249009192,-1.1037939824H,2.142  
6574357,-2.1148435791,-1.4029337988C,3.1228698719,-3.9483988815,-2.00  
52601442H,3.3672902628,-3.5612773484,-2.9999435028C,3.4986477652,-5.  
2502233614,-1.638539936C,3.173288782,-5.7378013746,-0.3624422118H,3.  
4445753358,-6.7593282506,-0.0759896243C,2.488803112,-4.9255523785,0.5  
51014429H,2.2105874485,-5.3112801927,1.535916618C,3.3574813722,1.049  
6078528,-0.5221976421C,3.8820766371,0.6171273141,-1.7648178795C,3.81  
33037978,0.4648578409,0.6883645237C,4.8433702185,-0.4131956559,-1.774  
0880534C,4.7797271731,-0.5540322703,0.6330473451C,5.3007424794,-1.01  
73989861,-0.5905585388H,5.2323858632,-0.7629238558,-2.7384472369H,5.  
1287889563,-1.0034495867,1.5706543669C,-4.0422033474,-0.3715952492,-0  
.93176383C,-4.2439433849,-1.6877463165,-0.4441989481C,-4.4757656684,  
-0.0220040175,-2.23750141C,-4.8877849299,-2.6286176159,-1.2703109744C  
C,-5.1126323678,-0.9944206736,-3.0292151972C,-5.3318232431,-2.3046804  
372,-2.5644701541H,-5.0403127902,-3.6466576615,-0.8904703152H,-5.451  
247875,-0.7173306478,-4.035527591H,4.0355422138,-5.8879162062,-2.3487  
788629C,-1.7348499764,0.7905369911,5.6834699971H,-2.803088998,0.5594  
643122,5.5276926166H,-1.4973498997,0.687292941,6.7549605809H,-1.5936  
724284,1.8509620385,5.4006266169C,-4.2514305334,1.372187681,-2.780680  
954H,-3.1760422211,1.5471962801,-2.9686362199C,-3.7234763064,-2.1051  
234165,0.9133792143C,-5.9947651326,-3.3402812992,-3.4460684157H,-6.4  
26078201,-4.1627788767,-2.849975659C,6.2928701293,-2.1588417764,-0.62  
10228897H,6.6597440321,-2.3492514885,-1.6436977409C,3.3756545,1.1994  
687316,-3.065533961H,3.522494415,2.2931117325,-3.1124531776C,3.25277  
58092,0.9160828036,2.0191222363H,2.1855866063,0.6444731169,2.10728233  
77H,-4.0946718188,-1.4538681333,1.7232781316H,-4.7929250137,1.520997  
9015,-3.7298269317H,-4.5831369161,2.146494748,-2.0656428727H,-6.7978  
06258,-2.8945925833,-4.0592879214H,-5.2622090159,-3.7874543359,-4.145  
8007235H,-4.0136105911,-3.1435800729,1.1457399925H,-2.620832606,-2.0  
443464438,0.9154533097H,7.1653097059,-1.9530108279,0.0262097755H,5.8  
285797651,-3.0921608477,-0.2499486333H,3.892931698,0.7461038806,-3.92  
80518464H,2.293546509,0.999192698,-3.1625821111H,3.7944905462,0.4502  
560301,2.8591103921H,3.3149641322,2.013378366,2.1334561607\\Version=E  
S64L-G09RevD.01\\State=1-A\\HF=-2744.5738521\\RMSD=5.533e-09\\RMSF=4.297e-  
06\\Dipole=1.9357807,-1.8507178,5.1028764\\Quadrupole=-5.3970991,8.00075  
3,-2.6036539,-20.8029182,2.3839022,-6.5868824\\PG=C01 [X(C53H48N1O4P1)]  
\\@

## TRIM1E Type II

1\\1\\GINC-WORKER0\\FOpt\\RTPSS\\STPSS\\def2SVP\\C53H48N1O4P1\\JHIOE\\19-Feb-2019  
\\0\\#p tpsstps\\def2svp empirical\\dispersion=gd3 int=ultrafine opt scrf  
=(smd,solvent=ch2cl2,read)\\title\\0,1\\P,0.2435317475,-0.5269533003,-1  
.3378371932O,-1.3323487876,-0.1477418071,-1.7685757054O,0.4699021972  
,0.6376544369,-0.117007209O,1.0960184283,-0.2617512622,-2.5438422821\\  
O,0.2959534707,-1.8258336027,-0.5385430013C,-2.2746832892,1.226493583  
5,-0.047677137C,-2.2773858888,0.0321480603,-0.7756252488C,-3.2471058  
074,-0.9997039478,-0.580999831C,-4.2152945273,-0.8056545488,0.395002  
1261H,-4.9823699696,-1.5717223468,0.5524632722C,-4.2209376288,0.3501  
188667,1.2262881953C,-3.225216969,1.3750918933,1.0268646148C,-3.1934  
6662,2.4692479859,1.9443982728H,-2.4173230832,3.2323805375,1.83842853  
67C,-4.1146485351,2.5660998959,2.9772334299H,-4.0613104839,3.4096361  
667,3.6742146243C,-5.121032943,1.5768782932,3.1444291675H,-5.8471699

375,1.6686300398,3.959406921\C,-5.1677743596,0.490454057,2.2856082821\H,-5.9232767536,-0.2925053324,2.4172527029\C,-1.261439767,2.277622615,-0.3533282494\C,0.0983997351,1.9471696664,-0.3419123043\C,1.1374678805,2.9186467402,-0.4742520895\C,0.7708376939,4.2406915359,-0.688774965\H,1.5474775973,5.008387768,-0.7766670916\C,-0.5947547522,4.6274142175,-0.8167345806\C,-1.6319984655,3.6360492501,-0.661695962\C,-2.9880671274,4.0426678655,-0.8498283197\H,-3.7833449153,3.2953549778,-0.775682668\C,-3.3065011483,5.3611282579,-1.1392614848\H,-4.354007383,5.6467875003,-1.2860433405\C,-2.2857042932,6.3426535443,-1.2564074654\H,-2.5511652176,7.3816816952,-1.4801307245\C,-0.957496745,5.9783557503,-1.1027315506\H,-0.1597292807,6.7224823159,-1.2082502562\C,5.4833263034,-2.1401229787,-1.1443327532\C,5.7306421425,-2.8473179851,0.0522098605\H,6.6365427024,-3.4572612938,0.140047481\C,4.838970088,-2.7893630703,1.1275472916\H,5.0525639248,-3.3668641124,2.0319307739\C,3.6499755476,-2.0270289312,1.0291316133\C,3.4173557768,-1.2912790454,-0.1566097527\H,2.5695608405,-0.6079006844,-0.2168799366\C,4.311356835,-1.35684245,-1.2226122605\H,4.096493846,-0.775685716,-2.1241443928\C,2.6888004543,-2.0092236362,2.1414654481\C,3.1842586652,-2.1621662917,3.5478839498\H,2.4700187721,-1.7501644495,4.2766823964\H,4.1573633458,-1.6581790304,3.6533751965\H,3.333581244,-3.2323566559,3.7814766065\N,1.4108029046,-1.8502744687,1.8706826158\H,1.0758599268,-1.7875177642,0.8447980496\C,0.3153438657,-1.8382452193,2.7946267404\C,-0.6331019434,-0.8060578198,2.6725391384\H,-0.4958150426,-0.0350402665,1.9100882794\C,-1.7429072914,-0.7915479705,3.5266631533\H,-2.4739474544,0.0180946614,3.443952387\C,-1.9237329882,-1.8128813717,4.472948404\C,-0.9900559545,-2.8571649464,4.5640828742\H,-1.1370215966,-3.6679141932,5.2853058165\C,0.1329950313,-2.877053562,3.7255947437\H,0.8457036435,-3.7048113935,3.7730874932\C,2.5721712299,2.5107711645,-0.3407121448\C,3.401556444,2.4279319575,-1.4861961731\C,3.1002132823,2.2187172891,0.9446881804\C,4.7534919051,2.0671688475,-1.3224768813\C,4.4548225242,1.8624976753,1.0613766709\C,5.3013874258,1.7820671853,-0.0602565273\H,5.390347601,1.9914610335,-2.2125268322\H,4.8578875781,1.6338434849,2.0560987318\C,-3.2160576671,-2.2436695792,-1.4118260971\C,-2.8299770476,-3.4773063639,-0.8233985007\C,-3.5845036268,-2.1906600723,-2.7793020362\C,-2.8242400561,-4.6365252919,-1.6189340461\C,-3.5655293993,-3.3770693425,-3.538025964\C,-3.1905104272,-4.61074573,-2.9786059461\H,-2.5154407823,-5.5866750662,-1.1647402013\H,-3.8534471233,-3.3321384655,-4.5958293755\H,-2.7990717664,-1.8001211591,5.1309162534\C,6.4543043622,-2.1752093848,-2.2972938392\H,6.9014538011,-1.1750217474,-2.4521108064\H,7.2711211387,-2.894557594,-2.1232600833\H,5.9401721209,-2.4446147531,-3.23762474\C,-3.9858706027,-0.8826347851,-3.4247287779\H,-3.1162056716,-0.2047077481,-3.5027870211\C,-2.3845588995,-3.5414921068,0.6214908212\C,-3.1797698382,-5.879398954,-3.8032646024\H,-2.1963757235,-6.381849568,-3.7499755494\C,6.7409265654,1.3453871767,0.0926836608\H,7.3105145598,1.4908840155,-0.8407242904\C,2.8328134937,2.65292794,-2.8697324635\H,2.3706978268,3.65082819,-2.9702275725\C,2.2176821247,2.268198748,2.1723583253\H,1.4473667371,1.4768073419,2.131711857\H,-3.2056148452,-3.2997725502,1.3196980058\H,7.2489790231,1.9031614041,0.9002481813\H,6.7950936194,0.2723080333,0.3578110273\H,2.8074195659,2.1214195987,3.0927319637\H,1.6829617781,3.2318586091,2.2518107812\H,3.6170677866,2.5576748417,-3.6397544227\H,2.0485128537,1.9003627647,-3.0725255495\H,-3.404337333,-5.674878539,-4.8637034339\H,-3.9290812658,-6.6032508668,-3.4304449221\H,-4.3855651684,-1.0454863959,-4.4397324074\H,-4.7538916732,-0.3559334004,-2.8298514312\H,-2.0092729934,-4.5475773895,0.8738884663\H,-1.5760020982,-2.812302817,0.7970341608\|Version=ES64L-G09RevD.01|State=1-A|HF=-2744.5726292|RMSD=2.951e-09|RMSF=2.887e-06|Dipole=2.4766682,-1.5582316,4.8253892|Quadrupole=14.5275706,-5.9773321,-8.5502385,-18.0566483,2.3442691,-15.847193|PG=C01 [X(C53H48N1O4P1)]\@\

### TRIM/1E Switching TS

1\1\GINC-LOGIN\SP\RTSPSS\def2SVP\C53H48N1O4P1\JHIOE\29-Mar-2019\0\#\# tpsstps\def2svp int=ultrafine empiricdispersion=gd3 scrf=(smd,so lvent=ch2cl2,read,externaliteration,dovacuum)\title\0,1P,0,0.347012,-0.056312,-0.132915\O,0,-0.8194,1.046381,0.395644\O,0,-0.668745,-1.309898,-0.619532\O,0,1.163112,-0.431289,1.083694\O,0,1.052533,0.416998,-1.389137\C,0,-2.946032,0.281851,-0.415818\C,0,-1.949621,1.264503,-0.368658\C,0,-2.085861,2.528892,-1.022799\C,0,-3.222739,2.752256,-1.788624\H,0,-3.354435,3.719799,-2.285454\C,0,-4.22022,1.750685,-1.96306\C,0,-4.081593,0.488909,-1.278635\C,0,-5.068874,-0.516706,-1.512874\H,0,-4.95947,-1.493491,-1.033429\C,0,-6.150728,-0.277409,-2.347088\H,0,-6.891262,-1.06728,-2.514845\C,0,-6.303621,0.979797,-2.991572\H,0,-7.166332,1.158216,-3.642726\C,0,-5.351757,1.969675,-2.805804\H,0,-5.447543,2.937579,-3.311058\C,0,-2.797116,-0.951281,0.40804\C,0,-1.646416,-1.731182,0.262026\C,0,-1.458557,-2.975663,0.939812\C,0,-2.457905,-3.401042,1.806001\H,0,-2.351361,-4.361161,2.322682\C,0,-3.616893,-2.613052,2.061077\C,0,-3.789386,-1.358426,1.370237\C,0,-4.927034,-0.558948,1.697152\H,0

-.5.051044,0.414622,1.214188\C,0,-5.863523,-0.992075,2.624085\H,0,-6.7  
25085,-0.358479,2.862143\C,0,-5.712084,-2.246915,3.273633\H,0,-6.46228  
2,-2.580411,3.998989\C,0,-4.606352,-3.03591,2.999637\H,0,-4.465903,-3.  
996337,3.508803\C,0,-0.237275,-3.803668,0.687657\C,0,0.776864,-3.90790  
5,1.676037\C,0,-0.10901,-4.500115,-0.539959\C,0,1.906551,-4.701811,1.4  
08065\C,0,1.030429,-5.297531,-0.757943\C,0,2.054769,-5.406285,0.198392  
\H,0,2.698138,-4.765781,2.165529\H,0,1.11932,-5.84353,-1.705373\C,0,-1  
.063898,3.607726,-0.836329\C,0,-0.112245,3.883085,-1.850966\C,0,-1.083  
45,4.378063,0.353216\C,0,0.807708,4.929139,-1.651564\C,0,-0.155075,5.4  
25578,0.504643\C,0,0.802564,5.715401,-0.483985\H,0,1.552152,5.133096,-  
2.431437\H,0,-0.172304,6.0193,1.427014\C,0,-2.070995,4.065463,1.455446  
\H,0,-1.875115,3.063586,1.880803\C,0,-0.05916,3.039217,-3.104875\C,0,1  
.83792,6.798274,-0.276282\H,0,2.818032,6.353849,-0.015613\C,0,3.301895  
-6.216979,-0.075022\H,0,3.532767,-6.900737,0.761976\C,0,0.682375,-3.1  
29948,2.969749\H,0,-0.229323,-3.382758,3.539211\C,0,-1.167519,-4.37968  
8,-1.613991\H,0,-1.166843,-3.361028,-2.043893\H,0,-1.027942,3.036937,-  
3.635568\C,0,3.140834,3.620855,2.786681\C,0,4.329843,2.952414,3.148093  
\H,0,4.8669,3.255577,4.053427\C,0,4.833401,1.903037,2.374798\H,0,5.747  
57,1.398858,2.699477\C,0,4.152672,1.476197,1.208129\C,0,2.964809,2.159  
26,0.836006\H,0,2.435748,1.894154,-0.085368\C,0,2.47287,3.201691,1.614  
503\H,0,1.557825,3.712501,1.30136\C,0,4.657005,0.372943,0.386862\C,0,6  
.091485,-0.046117,0.445774\H,0,6.418433,-0.091579,1.497112\H,0,6.72562  
3,0.706387,-0.056601\H,0,6.254765,-1.027074,-0.022288\N,0,3.802075,-0.  
239926,-0.412088\H,0,2.790923,-0.020217,-0.295224\C,0,4.050581,-1.2045  
42,-1.433453\C,0,5.074223,-1.016606,-2.380772\H,0,5.704745,-0.124159,-  
2.340972\C,0,5.24954,-1.966413,-3.395697\H,0,6.042364,-1.822151,-4.136  
967\C,0,4.403256,-3.08369,-3.473159\C,0,3.372155,-3.249814,-2.534329\H  
0,2.705328,-4.114723,-2.59327\C,0,3.186153,-2.312395,-1.51146\H,0,2.3  
92023,-2.44065,-0.769892\H,0,4.53996,-3.820831,-4.2713\C,0,2.592378,4.  
765222,3.599978\H,0,3.152732,4.907779,4.538175\H,0,2.639969,5.706864,3  
.020565\H,0,1.527809,4.596686,3.843477\H,0,1.555307,-3.330388,3.61393\  
H,0,0.650908,-2.048068,2.74636\H,0,3.200887,-6.816732,-0.995306\H,0,4.  
179015,-5.55393,-0.200795\H,0,-2.003531,4.803716,2.272054\H,0,-3.11022  
7,4.055715,1.079668\H,0,0.713565,3.409795,-3.799855\H,0,0.178815,1.992  
656,-2.839105\H,0,1.989383,7.39648,-1.192536\H,0,1.553101,7.48075,0.54  
2539\H,0,-0.987261,-5.09625,-2.432772\H,0,-2.180584,-4.558621,-1.21092  
4\|Version=ES64L-G09RevD.01\State=1-AIHF=-2744.5365861\|RMSD=5.105e-09\  
Dipole=4.9306913,0.7434514,0.6187754\|Quadrupole=33.8890338,-12.5399608  
,-21.349073,3.2576982,1.1289285,12.9675487\|PG=C01 [X(C53H48N1O4P1)]\|@

## TRIP/1E Type II

### Conf0

1\|GINC-WORKER0\SP\RTSPSTPSS\def2SV\PC65H72N1O4P1\JHIOE\05-May-2019\0  
\#p tpsstps\def2svp int=ultrafine empiricaldispersion=gd3 scrf=(smd,  
solvent=ch2cl2,read,externaliteration,dovacuum)\|title\|0,1\|P,0,-0.211  
306,-0.543612,-1.05158\O,0,-1.540091,0.439014,-1.327676\O,0,0.72606,0.  
529948,-0.118359\O,0,0.385891,-0.829223,-2.396274\O,0,-0.547219,-1.626  
422,-0.030592\C,0,-1.478252,2.243368,0.238585\C,0,-2.112545,1.104448,-  
0.262652\C,0,-3.368933,0.626001,0.22375\C,0,-3.958837,1.315777,1.27395  
4\H,0,-4.934559,0.993605,1.651432\C,0,-3.316655,2.423498,1.898685\C,0,  
-2.049237,2.891538,1.393179\C,0,-1.388242,3.943195,2.097643\H,0,-0.405  
365,4.279643,1.755322\C,0,-1.961277,4.523334,3.220465\H,0,-1.428719,5.  
320343,3.750891\C,0,-3.227744,4.086329,3.693607\H,0,-3.671901,4.55561,  
4.578195\C,0,-3.887699,3.05469,3.044385\H,0,-4.854138,2.691907,3.41240  
1\C,0,-0.212075,2.72164,-0.386198\C,0,0.874696,1.847981,-0.499038\C,0,  
2.180442,2.281763,-0.890914\C,0,2.339154,3.604938,-1.278893\H,0,3.3311  
92,3.965002,-1.571016\C,0,1.239185,4.510508,-1.319892\C,0,-0.058969,4.  
071167,-0.868889\C,0,-1.149475,4.989465,-0.949817\H,0,-2.147298,4.6607  
72,-0.644502\C,0,-0.963586,6.28056,-1.421893\H,0,-1.817054,6.964956,-1  
.481725\C,0,0.322065,6.720762,-1.836525\H,0,0.45617,7.74472,-2.202098\  
C,0,1.398728,5.849143,-1.788784\H,0,2.392434,6.172002,-2.1198\C,0,3.55  
0461,-4.331604,-1.369587\C,0,3.504131,-5.127359,-0.204594\H,0,3.902079  
-6.147731,-0.231619\C,0,2.963616,-4.634861,0.986739\H,0,2.932985,-5.2  
77792,1.871777\C,0,2.4182,-3.33021,1.037007\C,0,2.478781,-2.522418,-0.  
122918\H,0,2.154709,-1.479998,-0.082659\C,0,3.033534,-3.020473,-1.3013  
42\H,0,3.080199,-2.369575,-2.178535\C,0,1.830766,-2.824969,2.287924\C,  
0,2.467037,-3.194444,3.593188\H,0,2.267833,-2.440306,4.370141\H,0,3.55  
2801,-3.308125,3.453202\H,0,2.069053,-4.163289,3.948083\N,0,0.77992,-2  
.037666,2.208018\H,0,0.33831,-1.849618,1.235057\C,0,0.061755,-1.39607,  
3.263479\C,0,-0.351154,-0.068852,3.034427\H,0,-0.097396,0.41785,2.0887  
21\C,0,-1.077239,0.606113,4.022743\H,0,-1.383219,1.64216,3.851368\C,0,  
-1.417362,-0.04301,5.220411\C,0,-1.033615,-1.377385,5.426056\H,0,-1.31  
7798,-1.898061,6.346438\C,0,-0.295495,-2.062354,4.450965\H,0,-0.036356  
-3.113063,4.598809\C,0,3.336628,1.33234,-0.800761\C,0,3.915921,0.7755  
77,-1.968791\C,0,3.850003,0.993892,0.484423\C,0,5.003799,-0.110133,-1.

828311\C,0,4.935727,0.107662,0.569663\C,0,5.525536,-0.462006,-0.574498  
\H,0,5.452257,-0.550665,-2.726998\H,0,5.333994,-0.149227,1.55639\C,0,-  
4.027711,-0.556554,-0.418635\C,0,-4.140596,-1.788724,0.281067\C,0,-4.5  
56491,-0.436036,-1.73424\C,0,-4.820243,-2.856965,-0.336704\C,0,-5.2153  
41,-1.536361,-2.309187\C,0,-5.368139,-2.755254,-1.625233\H,0,-4.919699  
,-3.807524,0.200857\H,0,-5.62568,-1.434712,-3.320788\H,0,-1.9926,0.487  
458,5.986459\C,0,4.183327,-4.834289,-2.642924\H,0,5.148579,-4.32093,-2  
.816551\H,0,4.377135,-5.91883,-2.603884\H,0,3.544212,-4.618103,-3.5172  
93\C,0,-4.446235,0.859632,-2.540603\H,0,-3.879719,1.589296,-1.938393\C  
,0,-3.535912,-1.994504,1.672265\C,0,-6.101618,-3.933163,-2.261641\H,0,  
-6.057279,-4.770799,-1.540158\C,0,-4.619082,-1.953399,2.770682\H,0,-4.  
161227,-2.066325,3.770652\H,0,-5.177649,-1.001479,-2.757559\H,0,-5.3486  
15,-2.774026,2.636064\C,0,-5.416272,-4.40016,-3.562365\H,0,-5.442756,-  
3.609819,-4.33503\H,0,-4.358689,-4.664757,-3.384253\H,0,-5.928636,-5.2  
89346,-3.973679\C,0,-7.589252,-3.606155,-2.507415\H,0,-8.120146,-4.486  
754,-2.913639\H,0,-8.092262,-3.303874,-1.571371\H,0,-7.701305,-2.78035  
7,-3.234143\C,0,-3.662705,0.645066,-3.851851\H,0,-4.198502,-0.038602,-  
4.536188\H,0,-3.525028,1.606874,-4.379728\H,0,-2.665932,0.220389,-3.64  
439\C,0,-5.835215,1.477034,-2.805138\H,0,-5.736264,2.43928,-3.340548\H  
,0,-6.4627,0.809889,-3.424663\H,0,-6.373232,1.666264,-1.858714\C,0,6.7  
07782,-1.420808,-0.461291\H,0,6.840794,-1.886749,-1.456082\C,0,3.40372  
5,1.123251,-3.367957\H,0,2.4598,1.681642,-3.244981\C,0,3.281127,1.6374  
82,1.751527\H,0,2.220706,1.873564,1.558832\C,0,8.005338,-0.654974,-0.1  
25241\H,0,8.869421,-1.343745,-0.086424\H,0,8.218831,0.121627,-0.881304  
\H,0,7.923498,-0.15651,0.858572\C,0,6.453175,-2.55077,0.555718\H,0,6.3  
7807,-2.158554,1.586606\H,0,5.51717,-3.089141,0.327836\H,0,7.282708,-3  
.281056,0.538706\C,0,3.319578,0.719135,2.984891\H,0,2.861568,-0.259489  
,2.76661\H,0,4.351001,0.542264,3.340324\H,0,2.759441,1.179705,3.817786  
\C,0,4.001815,2.973567,2.036521\H,0,3.916828,3.664013,1.178903\H,0,3.5  
67086,3.472076,2.922605\H,0,5.076773,2.80233,2.230821\C,0,4.401928,2.0  
47031,-4.097492\H,0,4.600291,2.964729,-3.515343\H,0,5.368941,1.535934,  
-4.261762\H,0,4.005252,2.347442,-5.084867\C,0,3.078029,-0.12767,-4.207  
067\H,0,2.698085,0.17316,-5.201039\H,0,3.970649,-0.758532,-4.372067\H,  
0,2.296329,-0.72408,-3.708653\C,0,-2.71952,-3.299364,1.764291\H,0,-3.3  
61215,-4.194437,1.668865\H,0,-1.949162,-3.32764,0.97716\H,0,-2.215962,  
-3.359542,2.745531\H,0,-2.835701,-1.161555,1.852915\Version=ES64L-G09  
RevD.01\State=1-A\HF=-3216.0970767\RMSE=2.351e-09\Dipole=2.3432935,-1.  
9836445,4.6565248\Quadrupole=-8.428126,9.3776108,-0.9494848,-19.947016  
2,-2.2136709,-12.9820098\PG=C01 [X(C65H72N1O4P1)]\@

### Conf1

```
1\1\GINC-WORKER2\SP\IRTPSS\def2SVP\C65H72N1O4P1\JHIOE\05-May-2019\0  
\#p tpsstps\def2svp int=ultrafine empiricaldispersion=gd3 scrf=(smd,  
solvent=ch2cl2,read,externaliteration,dovacuum)\title\0,1\P,0,-0.199  
09,-0.47727,-1.120182\O,0,-1.493382,0.546728,-1.409092\O,0,0.738125,0.  
544853,-0.130925\O,0,0.430098,-0.740852,-2.454853\O,0,-0.592234,-1.575  
552,-0.136942\C,0,-1.424315,2.31929,0.191846\C,0,-2.075827,1.207383,-0  
.346734\C,0,-3.356371,0.754095,0.099124\C,0,-3.956484,1.443786,1.14378  
2\H,0,-4.950319,1.142061,1.489607\C,0,-3.302904,2.524301,1.803354\C,0,  
-2.009656,2.965057,1.340575\C,0,-1.340308,3.986777,2.080209\H,0,-0.339  
754,4.3017,1.770546\C,0,-1.92831,4.564732,3.196311\H,0,-1.389153,5.338  
473,3.753867\C,0,-3.218763,4.155427,3.627449\H,0,-3.674264,4.622937,4.  
507195\C,0,-3.888327,3.152988,2.943267\H,0,-4.874369,2.81166,3.27843\C  
,0,-0.125295,2.768972,-0.385262\C,0,0.938511,1.865297,-0.476927\C,0,2.  
270116,2.266493,-0.811345\C,0,2.482726,3.590885,-1.167809\H,0,3.495238  
,3.926542,-1.415386\C,0,1.411497,4.528983,-1.234056\C,0,0.085318,4.120  
948,-0.838447\C,0,-0.975039,5.071284,-0.944364\H,0,-1.992182,4.765803,  
-0.681369\C,0,-0.735513,6.363093,-1.389523\H,0,-1.566425,7.072636,-1.4  
70559\C,0,0.576812,6.772069,-1.749081\H,0,0.753434,7.796949,-2.093458\  
C,0,1.626189,5.869482,-1.674893\H,0,2.640195,6.168766,-1.963898\C,0,3.  
352282,-4.410132,-1.484189\C,0,2.920414,-3.072292,-1.386051\H,0,3.0053  
83,-2.406863,-2.248915\C,0,2.392707,-2.56762,-0.195839\H,0,2.129952,-1  
.509049,-0.131729\C,0,2.277042,-3.396114,0.942768\C,0,2.747109,-4.7299  
44,0.865655\H,0,2.676607,-5.388547,1.736857\C,0,3.259185,-5.226917,-0.  
334474\H,0,3.59397,-6.269079,-0.384656\C,0,1.698308,-2.891416,2.198207  
\C,0,2.303971,-3.315133,3.501411\H,0,2.134998,-2.566538,4.290897\H,0,3  
.383905,-3.480312,3.368251\H,0,1.854212,-4.269105,3.834232\H,0,0.67929  
8,-2.06285,2.121891\H,0,0.259703,-1.843133,1.146046\C,0,-0.033516,-1.4  
17187,3.178793\C,0,-0.413255,-0.078217,2.960163\H,0,-0.136634,0.412282  
,2.02306\C,0,-1.135192,0.603624,3.946669\H,0,-1.416115,1.647876,3.7813  
29\C,0,-1.503339,-0.049355,5.133863\C,0,-1.152084,-1.394118,5.32975\H,  
0,-1.458359,-1.917253,6.241608\C,0,-0.419613,-2.086752,4.355759\H,0,-0  
.18758,-3.144523,4.497316\C,0,3.390655,1.278157,-0.693354\C,0,3.989424  
,0.714096,-1.847492\C,0,3.847034,0.907937,0.604996\C,0,5.042567,-0.208  
894,-1.681119\C,0,4.899189,-0.014709,0.715904\C,0,5.510149,-0.589983,-  
0.414792\H,0,5.507701,-0.65291,-2.569513\H,0,5.256617,-0.295433,1.7120  
3\C,0,-4.027843,-0.404248,-0.574097\C,0,-4.188562,-1.641986,0.110594\C
```

,0,-4.522483,-0.25728,-1.89793\C,0,-4.882465,-2.68461,-0.529308\C,0,-5.198635,-1.336804,-2.497532\C,0,-5.399886,-2.555336,-1.830436\H,0,-5.013604,-3.63406,0.00196\H,0,-5.586546,-1.223177,-3.517466\H,0,-2.07496,0.486186,5.899092\C,0,3.951983,-4.940453,-2.762547\H,0,3.643269,-5.983539,-2.950038\H,0,3.666052,-4.322007,-3.629547\H,0,5.05746,-4.93469,-2.697134\C,0,-4.36083,1.042265,-2.68854\H,0,-3.794236,1.75292,-2.063997\C,0,-3.615395,-1.87779,1.510554\C,0,-6.147638,-3.704197,-2.501537\H,0,-6.432486,-3.358679,-3.51322\C,0,-4.716905,-1.818021,2.589583\H,0,-4.281007,-1.951888,3.596737\H,0,-5.250276,-0.851892,2.575479\H,0,-5.464878,-2.618067,2.43362\C,0,-7.444704,-4.052129,-1.74222\H,0,-7.223268,-4.413566,-0.720964\H,0,-8.10433,-3.170206,-1.65394\H,0,-8.004245,-4.848343,-2.266918\C,0,-5.250143,-4.947831,-2.666207\H,0,-5.788112,-5.748649,-3.206215\H,0,-4.333707,-4.706371,-3.233745\H,0,-4.943415,-5.351482,-1.683686\C,0,-3.547055,0.821679,-3.980108\H,0,-4.078354,0.154964,-4.684317\H,0,-3.375644,1.784719,-4.495736\H,0,-2.565158,0.374875,-3.749583\C,0,-5.727319,1.694553,-2.983577\H,0,-5.591686,2.658743,-3.507382\H,0,-6.354258,1.048228,-3.625194\H,0,-6.284979,1.88853,-2.04953\C,0,6.651025,-1.593172,-0.266641\H,0,6.88578,-1.96838,-1.280715\C,0,3.543654,1.104634,-3.258104\H,0,2.606847,1.680023,-3.160936\C,0,3.255191,1.557096,1.85877\H,0,2.20582,1.815804,1.636454\C,0,7.922009,-0.91716,0.289368\H,0,8.757536,-1.63927,0.341885\H,0,8.238142,-0.072188,-0.348152\H,0,7.748858,-0.526487,1.309317\C,0,6.245798,-2.804101,0.598061\H,0,6.030435,-2.502271,1.639714\H,0,5.344499,-3.296725,0.195563\H,0,7.061178,-3.550009,0.627912\C,0,3.239935,0.634618,3.089866\H,0,2.765935,-0.333718,2.85926\H,0,4.257406,0.434845,3.47231\H,0,2.668291,1.106443,3.908528\C,0,3.995043,2.876558,2.17187\H,0,3.951532,3.572624,1.315793\H,0,3.544051,3.380381,3.046742\H,0,5.059557,2.681045,2.397962\C,0,4.592194,2.024409,-3.919266\H,0,4.784747,2.92179,-3.304589\H,0,5.554067,1.49548,-4.054675\H,0,4.24521,2.35878,-4.914401\C,0,3.22864,-0.115298,-4.145017\H,0,2.902987,0.221482,-5.146634\H,0,4.112511,-0.764049,-4.285965\H,0,2.409626,-0.704467,-3.70085\C,0,-2.837292,-3.205864,1.60331\H,0,-3.501951,-4.081497,1.486555\H,0,-2.053997,-3.247816,0.829682\H,0,-2.353935,-3.290421,2.592826\H,0,-2.895582,-1.066727,1.712255\Version=ES64L-G09RevD.01\State=1-A\HF=-3216.0970674\IRMSD=2.411e-09\Dipole=2.1511303,-2.207221,4.6778427\Quadrupole=-9.8259229,12.0811125,-2.2551896,-18.9268475,-3.0530027,-12.2754142\PG=C01 [X(C65H72N1O4P1)]\@

## Conf2

1\1\GINC-WORKER0\SP\IRTPSS\TPSS\def2SVP\C65H72N1O4P1\JHIOE\05-May-2019\0  
\\#p tpsstps/def2svp int=ultrafine empiricaldispersion=gd3 scrf=(smd,  
solvent=ch2cl2,read,externaliteration,dovacuum)\title\0,1P,0,-0.155  
228,-0.579395,-0.967524\O,0,-1.438658,0.42075,-1.366627\O,0,0.754101,0.  
.513805,-0.029774\O,0,0.513917,-0.942732,-2.258201\O,0,-0.587418,-1.60  
3041,0.077683\C,0,-1.442528,2.273002,0.141688\C,0,-2.06485,1.127965,-0.  
.360351\C,0,-3.355556,0.682816,0.064064\C,0,-3.997133,1.417735,1.05174  
6\H,0,-4.999718,1.124407,1.378874\C,0,-3.376638,2.537694,1.676662\C,0,  
-2.073467,2.970274,1.234824\C,0,-1.441817,4.038812,1.94066\H,0,-0.4350  
51,4.34979,1.648056\C,0,-2.074505,4.668043,3.003484\H,0,-1.563772,5.47  
7591,3.536325\C,0,-3.373777,4.26429,3.412975\H,0,-3.864271,4.77124,4.2  
51036\C,0,-4.007391,3.21744,2.761794\H,0,-4.999691,2.880162,3.082335\C  
,0,-0.134269,2.709553,-0.424584\C,0,0.941952,1.814709,-0.45113\C,0,2.2  
70396,2.212857,-0.799977\C,0,2.471272,3.521275,-1.218696\H,0,3.482306,  
3.854152,-1.47594\C,0,1.393297,4.445004,-1.337501\C,0,0.066365,4.03988  
8,-0.942596\C,0,-1.001988,4.972788,-1.109781\H,0,-2.020526,4.668775,-0.  
.851344\C,0,-0.768606,6.24621,-1.607759\H,0,-1.605769,6.941729,-1.7335  
18\C,0,0.544994,6.654106,-1.964138\H,0,0.716416,7.664687,-2.350753\C,0,  
1.601508,5.766428,-1.835488\H,0,2.616792,6.062514,-2.12326\C,0,3.3800  
33,-4.498677,-0.906033\C,0,2.9726,-3.150063,-0.884041\H,0,3.138571,-2.  
516376,-1.759657\C,0,2.373378,-2.594182,0.248702\H,0,2.128611,-1.52925  
7,0.256458\C,0,2.163234,-3.379228,1.4049\C,0,2.604879,-4.725187,1.4047  
02\H,0,2.458762,-5.351126,2.290671\C,0,3.18613,-5.273761,0.26038\H,0,3.  
500474,-6.323492,0.268332\C,0,1.521772,-2.812329,2.602018\C,0,2.03259  
-3.190567,3.958784\H,0,1.852763,-2.390769,4.69428\H,0,3.109442,-3.409  
324,3.902064\H,0,1.519917,-4.102952,4.316322\N,0,0.534941,-1.96088,2.4  
26616\H,0,0.175942,-1.785633,1.416753\C,0,-0.21323,-1.238951,3.405937\  
C,0,-0.522414,0.101418,3.1021\H,0,-0.166834,0.535963,2.16361\C,0,-1.27  
8039,0.855422,4.00759\H,0,-1.504575,1.900551,3.778827\C,0,-1.750818,0.  
273151,5.194446\C,0,-1.46658,-1.072443,5.474595\H,0,-1.853256,-1.53970  
5,6.386283\C,0,-0.699195,-1.836435,4.584427\H,0,-0.51618,-2.893487,4.7  
88585\C,0,3.417597,1.259815,-0.647689\C,0,4.039479,0.687945,-1.788694\  
C,0,3.906187,0.965319,0.655219\C,0,5.165107,-0.13767,-1.605589\C,0,5.0  
34339,0.135074,0.784315\C,0,5.687539,-0.41705,-0.33139\H,0,5.648612,-0.  
.57182,-2.488369\H,0,5.428801,-0.084659,1.783075\C,0,-3.992199,-0.5131  
01,-0.576324\C,0,-4.176093,-1.71483,0.160919\C,0,-4.428565,-0.437254,-  
1.928834\C,0,-4.838244,-2.793398,-0.45754\C,0,-5.069459,-1.548562,-2.5  
03418\C,0,-5.296624,-2.734295,-1.78317\H,0,-4.992347,-3.719527,0.10895  
1\H,0,-5.404763,-1.482562,-3.545152\H,0,-2.350516,0.865497,5.893445\C,

0,4.044046,-5.094083,-2.122536\H,0,3.496121,-5.987742,-2.473542\H,0,4.095451,-4.368036,-2.94997\H,0,5.072992,-5.421324,-1.883397\C,0,-4.241003,0.821196,-2.778528\H,0,-3.707247,1.569361,-2.169105\C,0,-3.658689,-1.880524,1.592103\C,0,-5.989846,-3.932305,-2.426483\H,0,-6.10599,-4.700324,-1.638714\C,0,-4.802213,-1.777047,2.62324\H,0,-4.405745,-1.853795,3.652485\H,0,-5.342695,-0.818646,2.537555\H,0,-5.536534,-2.591929,2.48001\C,0,-5.123525,-4.542873,-3.547949\H,0,-4.975629,-3.822056,-4.37327\H,0,-4.12733,-4.832203,-3.168357\H,0,-5.606618,-5.444278,-3.968369\C,0,-7.397789,-3.576437,-2.944915\H,0,-7.902256,-4.474182,-3.346977\H,0,-8.028368,-3.161826,-2.138014\H,0,-7.350087,-2.827253,-3.756669\C,0,-3.371413,0.540385,-4.021301\H,0,-3.866838,-0.16954,-4.709253\H,0,-3.18778,1.475924,-4.581414\H,0,-2.396134,0.118589,-3.725892\C,0,-5.598815,1.442687,-3.165234\H,0,-5.449154,2.382607,-3.727831\H,0,-6.189471,0.758859,-3.802499\H,0,-6.200082,1.673453,-2.267273\C,0,6.927798,-1.28999,-0.156235\H,0,7.16665,-1.298142,0.924082\C,0,3.533673,0.964387,-3.205914\H,0,2.567179,1.489157,-3.115409\C,0,3.272983,1.598974,1.896123\H,0,2.223227,1.833055,1.651385\C,0,6.663771,-2.747211,-0.586875\H,0,7.563843,-3.369667,-0.429419\H,0,5.834836,-3.188119,-0.007521\H,0,6.396891,-2.803394,-1.657988\C,0,8.144554,-0.70187,-0.899101\H,0,7.981635,-0.696785,-1.992557\H,0,8.342965,0.337318,-0.580402\H,0,9.050899,-1.302042,-0.698073\C,0,3.251307,0.665426,3.119475\H,0,2.802298,-0.310245,2.868547\H,0,4.264805,0.481944,3.519907\H,0,2.653982,1.117515,3.931128\C,0,3.972332,2.934604,2.230116\H,0,3.929303,3.631498,1.374335\H,0,3.488969,3.424127,3.09581\H,0,5.03651,2.76724,2.479369\C,0,4.503952,1.896014,-3.961884\H,0,4.661004,2.842682,-3.414765\H,0,5.491228,1.416118,-4.096913\H,0,4.10649,2.141742,-4.963936\C,0,3.268215,-0.331829,-3.996825\H,0,2.892861,-0.08725,-5.007868\H,0,4.186636,-0.934521,-4.121598\H,0,2.501315,-0.93652,-3.485767\C,0,-2.879221,-3.198276,1.777228\H,0,-3.535891,-4.08198,1.677976\H,0,-2.066978,-3.273439,1.036588\H,0,-2.433127,-3.232927,2.78703\H,0,-2.950683,-1.056251,1.781902\Version=ES64L-G09RevD.01\State=1-AHF=-3216.0959114\RMSD=2.239e-09\Dipole=1.8737331,-1.9436175,4.8971892\Quadrupole=-10.7882883,10.2639406,0.5243477,-17.931839,-2.4719673,-14.8071693\PG=C01 [X(C65H72N1O4P1)]\@

### Conf3

1\1\GINC-WORKER2\SP\RTPSS\STPSS\def2SVP\C65H72N1O4P1\JHIOE\05-May-2019\0  
\#p tpsstps\def2svp int=ultrafine empirical\dispersion=gd3 scrf=(smd,  
solvent=ch2cl2,read,externaliteration,dovacuum)\title\O,1\P,0,-0.216  
017,-0.537977,-1.069941\O,0,-1.545208,0.445569,-1.341215\O,0,0.728224,  
0.534188,-0.142033\O,0,0.375417,-0.823764,-2.417141\O,0,-0.549913,-1.6  
1786,-0.045375\C,0,-1.460074,2.267169,0.202987\C,0,-2.103595,1.124232,  
-0.277059\C,0,-3.354082,0.65363,0.231815\C,0,-3.929704,1.358872,1.2796  
81\H,0,-4.9008,1.043347,1.674288\C,0,-3.278431,2.473956,1.881475\C,0,-  
2.016074,2.932585,1.355116\C,0,-1.34481,3.991941,2.038216\H,0,-0.36520  
3,4.321958,1.680605\C,0,-1.90373,4.587637,3.160051\H,0,-1.363613,5.390  
35,3.673981\C,0,-3.16536,4.159423,3.65365\H,0,-3.598375,4.64079,4.5372  
7\C,0,-3.834796,3.120931,3.025518\H,0,-4.797485,2.76471,3.409404\C,0,-  
0.193975,2.728904,-0.434712\C,0,0.887493,1.847288,-0.534545\C,0,2.1979  
39,2.268219,-0.924196\C,0,2.365036,3.584396,-1.332181\H,0,3.360407,3.9  
35279,-1.624297\C,0,1.269747,4.494791,-1.391837\C,0,-0.031838,4.070158  
,-0.936268\C,0,-1.116623,4.993769,-1.031009\H,0,-2.116253,4.675525,-0.  
72036\C,0,-0.922821,6.275998,-1.523608\H,0,-1.771979,6.964709,-1.59448  
3\C,0,0.365582,6.701533,-1.945089\H,0,0.505813,7.71848,-2.327553\C,0,1  
.437265,5.824677,-1.882317\H,0,2.433035,6.136714,-2.217518\C,0,3.4111,  
-4.384289,-1.449758\C,0,2.952858,-3.054539,-1.363125\H,0,3.001324,-2.4  
02597,-2.238851\C,0,2.446443,-2.539442,-0.168112\H,0,2.163647,-1.48535  
,-0.116669\C,0,2.379366,-3.349478,0.987916\C,0,2.87546,-4.674507,0.920  
75\H,0,2.842768,-5.318682,1.804913\C,0,3.365951,-5.182145,-0.283841\H  
0,3.721797,-6.217726,-0.324495\C,0,1.826044,-2.833339,2.250151\C,0,2.  
473182,-3.222961,3.543793\H,0,2.3237,-2.455353,4.319067\H,0,3.549598,-  
3.385603,3.382833\H,0,2.039158,-4.170138,3.914636\N,0,0.792697,-2.0213  
18,2.18778\H,0,0.341234,-1.830817,1.220107\C,0,0.104729,-1.358414,3.25  
0211\C,0,-0.301171,-0.03107,3.007645\H,0,-0.063842,0.436365,2.048141\C  
0,-0.997833,0.669144,3.999363\H,0,-1.298165,1.704723,3.815293\C,0,-1.  
316059,0.045572,5.216426\C,0,-0.940726,-1.288779,5.436788\H,0,-1.20859  
4,-1.790187,6.372625\C,0,-0.232465,-1.999374,4.457734\H,0,0.017356,-3.  
049749,4.621315\C,0,3.348211,1.31432,-0.805673\C,0,3.940484,0.737388,-  
1.956992\C,0,3.842952,0.992677,0.492005\C,0,5.022453,-0.15189,-1.78888  
2\C,0,4.922287,0.102411,0.604406\C,0,5.525415,-0.486755,-0.523306\H,0,  
5.481701,-0.606574,-2.674989\H,0,5.308585,-0.141089,1.599504\C,0,-4.02  
3718,-0.538553,-0.381813\C,0,-4.119539,-1.761472,0.336759\C,0,-4.5826,  
-0.436166,-1.686292\C,0,-4.813502,-2.837467,-0.250334\C,0,-5.256883,-1  
.543266,-2.229887\C,0,-5.393267,-2.752741,-1.52611\H,0,-4.898937,-3.78  
1143,0.301448\H,0,-5.690782,-1.4551,-3.232914\H,0,-1.868086,0.595453,5  
.985848\C,0,3.990507,-4.923636,-2.733656\H,0,3.689029,-5.972023,-2.902  
768\H,0,3.680898,-4.31865,-3.601964\H,0,5.096927,-4.906188,-2.689827\C  
0,-4.4845,0.846376,-2.514792\H,0,-3.9087,1.585061,-1.932559\C,0,-3.48

2885,-1.948507,1.716044\C,0,-6.138215,-3.940819,-2.129115\H,0,-6.07947  
4,-4.766401,-1.394843\C,0,-4.537279,-1.875794,2.840351\H,0,-4.054849,-  
1.975356,3.830106\H,0,-5.086529,-0.918619,2.823913\H,0,-5.278381,-2.69  
0982,2.739727\C,0,-5.475179,-4.428541,-3.43379\H,0,-5.516569,-3.651146  
, -4.218806\H,0,-4.414142,-4.688336,-3.269654\H,0,-5.993083,-3.325376,-  
3.820802\C,0,-7.630588,-3.620008,-2.352945\H,0,-8.166855,-4.507882,-2.  
735567\H,0,-8.117202,-3.304161,-1.412685\H,0,-7.757833,-2.806016,-3.09  
0383\C,0,-3.719795,0.608832,-3.833364\H,0,-4.265258,-0.087064,-4.49744  
8\H,0,-3.590011,1.561089,-4.380223\H,0,-2.719897,0.188066,-3.633076\C,  
0,-5.87656,1.46052,-2.770188\H,0,-5.784314,2.41461,-3.321105\H,0,-6.51  
2317,0.784704,-3.371598\H,0,-6.402146,1.664206,-1.819788\C,0,6.691328,  
-1.45997,-0.371033\H,0,6.92411,-1.846488,-1.381283\C,0,3.452427,1.0718  
79,-3.36809\H,0,2.514622,1.644512,-3.26601\C,0,3.261704,1.658368,1.742  
106\H,0,2.19927,1.876977,1.539959\C,0,7.952002,-0.747467,0.161711\H,0,  
8.803875,-1.449966,0.217675\H,0,8.243175,0.093926,-0.492268\H,0,7.7802  
96,-0.344431,1.177055\C,0,6.320232,-2.664511,0.517729\H,0,6.110784,-2.  
349191,1.5566\H,0,5.423923,-3.180719,0.134475\H,0,7.150208,-3.394065,0  
.550331\C,0,3.306762,0.769622,2.996773\H,0,2.871505,-0.223428,2.797831  
\H,0,4.338125,0.623072,3.365899\H,0,2.72941,1.237826,3.813388\C,0,3.96  
5295,3.008961,2.00063\H,0,3.877799,3.679165,1.127545\H,0,3.519254,3.52  
2205,2.872555\H,0,5.04088,2.854328,2.204956\C,0,4.472802,1.972527,-4.0  
96002\H,0,4.676477,2.894661,-3.522756\H,0,5.434569,1.446298,-4.241906\  
H,0,4.092494,2.266147,-5.091823\C,0,3.120337,-0.185411,-4.195198\H,0,2  
.766956,0.106904,-5.201402\H,0,4.003536,-0.836217,-4.33104\H,0,2.31662  
3,-0.758791,-3.704731\C,0,-2.678331,-3.260246,1.8136\H,0,-3.331928,-4.  
150035,1.757559\H,0,-1.931124,-3.315641,1.005929\H,0,-2.147435,-3.3040  
22,2.781115\H,0,-2.769819,-1.11994,1.863624\Version=ES64L-G09RevD.0\1  
State=1-A\HF=-3216.0970157\RMSD=2.389e-09\Dipole=2.3361036,-2.0319428,  
4.6541888\Quadrupole=-9.4883586,10.703515,-1.2151564,-19.9919649,-1.92  
95199,-12.598029\PG=C01[X(C65H72N1O4P1)]\@

## TRIP/IE Type I

### Conf0

1\1\GINC-LOGIN\SPRTSPSS\def2SVP\C65H72N1O4P1\HIOE\06-May-2019\0\1  
#p tpsstps\def2svp int=ultrafine empiricdispersion=gd3 scrf=(smd,so  
lvent=ch2cl2,read,externaliteration,dovacuum)\title\0,1\IP,0,-0.10843  
9,-0.447366,-1.242731\O,0,-1.431908,0.570095,-1.391101\O,0,0.823429,0.  
472831,-0.160745\O,0,0.504533,-0.533094,-2.608759\O,0,-0.45731,-1.6674  
14,-0.396129\C,0,-1.312229,2.256433,0.304329\C,0,-1.988344,1.187587,-0  
.291383\C,0,-3.286663,0.753824,0.125556\C,0,-3.876454,1.410077,1.19781  
\H,0,-4.878244,1.113224,1.525644\C,0,-3.198893,2.438397,1.913361\C,0,-  
1.887489,2.858895,1.482717\C,0,-1.192634,3.818651,2.27983\H,0,-0.17906  
7,4.115366,1.995523\C,0,-1.773362,4.360781,3.417199\H,0,-1.214585,5.08  
7395,4.017267\C,0,-3.082128,3.976408,3.814797\H,0,-3.531886,4.416673,4  
.711386\C,0,-3.77625,3.030518,3.07697\H,0,-4.77625,2.705804,3.386313\C  
,0,-0.009473,2.720243,-0.252886\C,0,1.041097,1.811262,-0.414385\C,0,2.  
374166,2.213048,-0.740573\C,0,2.602375,3.555336,-1.010021\H,0,3.617068  
,3.893658,-1.244154\C,0,1.54403,4.509893,-1.004389\C,0,0.215367,4.0953  
77,-0.625037\C,0,-0.833204,5.063391,-0.669616\H,0,-1.853229,4.756108,-  
0.420771\C,0,-0.579725,6.376061,-1.040006\H,0,-1.402474,7.098707,-1.07  
6085\C,0,0.735988,6.78997,-1.380543\H,0,0.923725,7.831021,-1.665393\C,  
0,1.774135,5.871738,-1.365401\H,0,2.790502,6.174335,-1.642256\C,0,-1.4  
84247,-0.672644,4.67252\C,0,-0.968356,-1.891613,5.160822\H,0,-1.320245  
,-2.279614,6.123\C,0,-0.012532,-2.614593,4.439549\H,0,0.362478,-3.5587  
86,4.845938\C,0,0.428027,-2.154778,3.17601\C,0,-0.078816,-0.926491,2.6  
8633\H,0,0.274329,-0.519187,1.736303\C,0,-1.006796,-0.200796,3.429945\  
H,0,-1.371773,0.752816,3.037219\C,0,1.403641,-2.937189,2.402355\C,0,2.  
426712,-3.767474,3.117788\H,0,3.325139,-3.915549,2.498661\H,0,2.01044,  
-4.762785,3.3587\H,0,2.704368,-3.280514,4.064871\N,0,1.372655,-2.85735  
2,1.090101\H,0,0.606212,-2.27416,0.599507\C,0,2.20945,-3.520338,0.1374  
94\C,0,2.717731,-2.750206,-0.925311\H,0,2.5404,-1.672167,-0.960912\C,0  
,3.477148,-3.373817,-1.922648\H,0,3.87709,-2.770691,-2.742866\C,0,3.73  
0136,-4.753178,-1.864869\C,0,3.213604,-5.515541,-0.805085\H,0,3.39546,  
-6.594493,-0.761647\C,0,2.444424,-4.907006,0.195838\H,0,2.004112,-5.50  
8078,0.99558\C,0,3.48478,1.206269,-0.711889\C,0,4.057083,0.722082,-1.9  
16024\C,0,3.96308,0.739105,0.545938\C,0,5.115808,-0.204856,-1.837164\C  
,0,5.014713,-0.191689,0.569146\C,0,5.604654,-0.681054,-0.610959\H,0,5.  
5625,-0.584316,-2.763753\H,0,5.383773,-0.549263,1.535242\C,0,-3.980424  
,-0.362854,-0.592434\C,0,-4.216442,-1.600085,0.066686\C,0,-4.420837,-0  
.179444,-1.933762\C,0,-4.908221,-2.615482,-0.622588\C,0,-5.101691,-1.2  
26538,-2.577836\C,0,-5.361243,-2.453411,-1.94095\H,0,-5.093554,-3.5707  
58,-0.11618\H,0,-5.446515,-1.075668,-3.607584\H,0,4.325067,-5.234896,-



2.647885\C,0,-2.523635,0.111107,5.433506\H,0,-3.465263,0.161198,4.855197\H,0,-2.742457,-0.343867,6.413387\H,0,-2.192947,1.153222,5.592985\C,0,-4.211482,1.135438,-2.687878\H,0,-3.636375,1.814774,-2.037095\C,0,-0.720329,-1.878277,1.487151\C,0,-6.116791,-3.571614,-2.654339\H,0,-6.14501,-4.434986,-1.963017\C,0,-4.88892,-1.972418,2.489305\H,0,-4.50968,-2.149673,3.512606\H,0,-5.485721,-1.042881,2.50159\H,0,-5.568433,-2.806711,2.233482\C,0,-5.395604,-4.024369,-3.940333\H,0,-5.354973,-3.208632,-4.685447\H,0,-4.358973,-4.340993,-3.727378\H,0,-5.926608,-4.875625,-4.404737\C,0,-7.574175,-3.161769,-2.952167\H,0,-8.129002,-3.99836,-3.415566\H,0,-8.103784,-2.868803,-2.027948\H,0,-7.611361,-2.305058,-3.650321\C,0,-3.389343,0.933473,-3.976782\H,0,-3.927569,0.299655,-4.705724\H,0,-3.192509,1.907261,-4.462227\H,0,-2.41928,0.459801,-3.750816\C,0,-5.559098,1.82818,-2.97985\H,0,-5.395071,2.802725,-3.475716\H,0,-6.193268,1.213746,-3.645309\H,0,-6.122913,2.009802,-2.046998\C,0,6.749983,-1.689999,-0.5687\H,0,6.839995,-2.115217,-1.586294\C,0,3.558595,1.188375,-3.285056\H,0,2.586931,1.687553,-3.127134\C,0,3.381855,1.277237,1.856181\H,0,2.315401,1.499256,1.678472\C,0,8.085058,-0.989475,-0.236153\H,0,8.921627,-1.712275,-0.250661\H,0,8.308839,-0.189779,-0.964591\H,0,8.047304,-0.531347,0.769749\C,0,6.482404,-2.855178,0.404198\H,0,6.455676,-2.509525,1.453758\H,0,5.520417,-3.349461,0.182615\H,0,7.283275,-3.612873,0.327505\C,0,3.443148,0.272343,3.019914\H,0,3.039284,-0.710206,2.723786\H,0,4.476195,0.121119,3.382673\H,0,2.84605,0.644106,3.871358\C,0,4.068608,2.604094,2.247969\H,0,3.976026,3.357404,1.446343\H,0,3.614445,3.02218,3.165276\H,0,5.145191,2.441447,2.440588\C,0,4.530792,2.219551,-3.896614\H,0,4.668989,3.089544,-3.230829\H,0,5.524911,1.767212,-4.071603\H,0,4.149514,2.588176,-4.866831\C,0,3.306982,0.018743,-4.255803\H,0,2.887194,0.40279,-5.203896\H,0,4.238658,-0.521907,-4.504231\H,0,2.578078,-0.686219,-3.824415\C,0,-2.83138,-3.136987,1.547764\H,0,-3.405939,-4.055154,1.324938\H,0,-2.002695,-3.053794,0.825605\H,0,-2.40214,-3.249396,2.560089\H,0,-3.08899,-1.028144,1.791982\\Version=ES64L-G09Revd.01\State=1-AHF=-3216.0973304\RMSD=6.007e-09\Dipole=1.708134,-2.4218302,5.0102926\Quadrupole=-8.2872772,12.7295441,-4.442267,-17.3134219,-4.928402,-13.6000131\PG=C01 [X(C65H72N1O4P1)]\@\

#### Conf1

1\1\GINC-WORKER2\SP\RTSPSTPSS\def2SVP\C65H72N1O4P1\JHIOE\05-May-2019\0  
\\#p tpsstps\def2svp int=ultrafine empiricaldispersion=gd3 scrf=(smd,  
solvent=ch2cl2,read,externaliteration,dovacuum)\title\O,1\P,0,-0.101  
954,-0.381699,-1.301615\O,0,-1.385719,0.68041,-1.476842\O,0,0.823327,0  
.492836,-0.17659\O,0,0.554728,-0.465515,-2.647403\O,0,-0.517626,-1.600  
693,-0.484293\C,0,-1.263055,2.340934,0.242693\C,0,-1.95202,1.296689,-0  
.381248\C,0,-3.266946,0.885425,0.004014\C,0,-3.867256,1.546746,1.06707  
5\H,0,-4.883068,1.270843,1.3685\C,0,-3.184311,2.554967,1.805894\C,0,-1  
.852605,2.946971,1.412144\C,0,-1.156077,3.883852,2.234627\H,0,-0.1288,  
4.158197,1.979161\C,0,-1.753245,4.432632,3.360238\H,0,-1.192982,5.1414  
83,3.979868\C,0,-3.08106,4.078039,3.720394\H,0,-3.543724,4.5236,4.6077  
56\C,0,-3.777705,3.153619,2.958148\H,0,-4.793118,2.851335,3.238783\C,0  
,0.070069,2.767785,-0.272017\C,0,1.094351,1.825007,-0.40823\C,0,2.4504  
14,2.182934,-0.686861\C,0,2.732089,3.518056,-0.940661\H,0,3.764549,3.8  
23737,-1.139445\C,0,1.706396,4.5076,-0.962639\C,0,0.353436,4.136701,-0  
.626142\C,0,-0.659297,5.14074,-0.693906\H,0,-1.695854,4.867359,-0.4757  
06\C,0,-0.350395,6.445938,-1.048306\H,0,-1.14661,7.196585,-1.102914\C,  
0,0.987973,6.816013,-1.348551\H,0,1.219782,7.851278,-1.621702\C,0,1.99  
321,5.862532,-1.308233\H,0,3.027119,6.13154,-1.553061\C,0,-1.57454,-0.  
652599,4.584802\C,0,-1.107824,-1.897052,5.058124\H,0,-1.49024,-2.29172  
2,6.005855\C,0,-0.163586,-2.637863,4.339718\H,0,0.172505,-3.601691,4.7  
33764\C,0,0.31245,-2.170405,3.09205\C,0,-0.143056,-0.916083,2.618567\H  
,0,0.23953,-0.50428,1.681967\C,0,-1.058425,-0.172837,3.360745\H,0,-1.3  
84547,0.799991,2.98052\C,0,1.268749,-2.975212,2.317035\C,0,2.254938,-3  
.850896,3.030236\H,0,3.158867,-4.010372,2.421629\H,0,1.80621,-4.839041  
,3.240344\H,0,2.53092,-3.395106,3.993061\N,0,1.251656,-2.879156,1.0055  
95\H,0,0.510859,-2.262893,0.515859\C,0,2.072056,-3.56132,0.052336\C,0,  
2.612456,-2.799783,-1.000854\H,0,2.471471,-1.716263,-1.028694\C,0,3.35  
6902,-3.439834,-1.9989\H,0,3.783034,-2.843566,-2.810815\C,0,3.56236,-4  
.827556,-1.95245\C,0,3.014219,-5.581007,-0.902325\H,0,3.159199,-6.6658  
13,-0.867211\C,0,2.260829,-4.95535,0.10005\H,0,1.79691,-5.548425,0.892  
258\C,0,3.524456,1.138065,-0.62299\C,0,4.112799,0.627485,-1.808033\C,0  
,3.952326,0.663004,0.650547\C,0,5.138819,-0.333097,-1.695663\C,0,4.972  
217,-0.300692,0.706965\C,0,5.579985,-0.814652,-0.453896\H,0,5.599313,-  
0.73152,-2.607321\H,0,5.30627,-0.663537,1.684094\C,0,-3.966786,-0.2152  
41,-0.733828\C,0,-4.210479,-1.461862,-0.091261\C,0,-4.404503,-0.010114  
,-2.070005\C,0,-4.916526,-2.458668,-0.787945\C,0,-5.100324,-1.043492,-  
2.725746\C,0,-5.37396,-2.272556,-2.10443\H,0,-5.105201,-3.416059,-0.28  
8621\H,0,-5.445259,-0.884575,-3.754983\H,0,4.145345,-5.322255,-2.73634  
\C,0,-2.5983,0.152558,5.344667\H,0,-3.501252,0.309655,4.726329\H,0,-2.  
898147,-0.346618,6.280574\H,0,-2.20446,1.155391,5.591544\C,0,-4.169002  
,1.308093,-2.809557\H,0,-3.594201,1.973064,-2.143499\C,0,-3.707342,-1.

758119,1.322827\C,0,-6.133401,-3.373288,-2.840045\H,0,-6.381927,-2.981  
24,-3.8444\C,0,-4.859849,-1.762402,2.347931\H,0,-4.472203,-1.947593,3.  
366632\H,0,-5.398337,-0.798457,2.356639\H,0,-5.593484,-2.556844,2.1154  
88\C,0,-7.459068,-3.71985,-2.131308\H,0,-7.276344,-4.135655,-1.12312\H  
,0,-8.097893,-2.82561,-2.018345\H,0,-8.024631,-4.474811,-2.707971\C,0,  
-5.261677,-4.631745,-3.030385\H,0,-5.803828,-5.397618,-3.615088\H,0,-4  
.32467,-4.391611,-3.563809\H,0,-4.991463,-5.079924,-2.05642\C,0,-3.329  
358,1.104892,-4.087181\H,0,-3.865235,0.485093,-4.829706\H,0,-3.110288,  
2.079674,-4.561024\H,0,-2.370144,0.614757,-3.849938\C,0,-5.50193,2.022  
158,-3.115874\H,0,-5.316897,2.998744,-3.600143\H,0,-6.134353,1.423003,  
-3.796673\H,0,-6.077263,2.203131,-2.189931\C,0,6.686791,-1.862333,-0.3  
65121\H,0,6.88289,-2.212807,-1.396109\C,0,3.668749,1.106805,-3.191069\  
H,0,2.702524,1.624359,-3.061616\C,0,3.352047,1.226652,1.941528\H,0,2.2  
96412,1.474268,1.734008\C,0,7.993801,-1.246114,0.177301\H,0,8.805109,-  
1.997112,0.188151\H,0,8.32253,-0.394141,-0.444301\H,0,7.857508,-0.8787  
8,1.211528\C,0,6.264536,-3.086687,0.472739\H,0,6.088739,-2.812435,1.52  
9212\H,0,5.337707,-3.538293,0.078956\H,0,7.056192,-3.857928,0.456882\C  
,0,3.358395,0.231043,3.114917\H,0,2.938889,-0.744647,2.818041\H,0,4.37  
7691,0.059514,3.506446\H,0,2.748106,0.624954,3.94682\C,0,4.063015,2.53  
8174,2.342035\H,0,4.008571,3.289191,1.535021\H,0,3.598574,2.972964,3.2  
46334\H,0,5.130209,2.348881,2.560646\C,0,4.681318,2.119497,-3.766704\H  
,0,4.820002,2.981882,-3.091351\H,0,5.669515,1.645399,-3.91578\H,0,4.33  
6425,2.502307,-4.74499\C,0,3.424265,-0.052506,-4.175599\H,0,3.04511,0.  
345224,-5.135089\H,0,4.351318,-0.61281,-4.396028\H,0,2.665418,-0.74233  
3,-3.772737\C,0,-2.906032,-3.073623,1.389567\H,0,-3.546387,-3.955091,1  
.200856\H,0,-2.090188,-3.062133,0.64872\H,0,-2.462694,-3.194868,2.3946  
7\H,0,-3.014469,-0.948273,1.602377\Version=ES64L-G09RevD.01\State=1-A  
\HF=-3216.0974305\RMSD=6.114e-09\Dipole=1.5336404,-2.5800941,5.0002904  
\Quadrupole=-9.3084686,14.6792822,-5.3708136,-16.250315,-5.5550033,-12  
.5917013\PG=C01 [X(C65H72N1O4P1)]\@

## Conf2

1\1\GINC-WORKER0\SP\IRTPSS\def2SVP\C65H72N1O4P1\JHIOE\06-May-2019\0  
\#p tpsstps/def2svp int=ultrafine empiricaldispersion=gd3 scrf=(smd,  
solvent=ch2cl2,read,externaliteration,dovacuum)\title\0,1\P,0,-0.065  
194,-0.472512,-1.22955\O,0,-1.286101,0.637643,-1.51914\O,0,0.849498,0.  
412355,-0.101712\O,0,0.64751,-0.656324,-2.535968\O,0,-0.584102,-1.6221  
75,-0.371724\C,0,-1.205624,2.333403,0.164606\C,0,-1.893667,1.296917,-0  
.471989\C,0,-3.240456,0.936478,-0.151613\C,0,-3.878041,1.646853,0.8565  
22\H,0,-4.918442,1.414009,1.105324\C,0,-3.205642,2.655461,1.604662\C,0  
,-1.840855,2.992651,1.279752\C,0,-1.161246,3.929772,2.115875\H,0,-0.11  
1806,4.161719,1.913904\C,0,-1.804039,4.531229,3.188242\H,0,-1.25691,5.  
239152,3.820539\C,0,-3.162217,4.231455,3.478097\H,0,-3.66028,4.717706,  
4.323881\C,0,-3.844441,3.307768,2.701975\H,0,-4.88396,3.046624,2.93058  
5\C,0,0.164754,2.705571,-0.291004\C,0,1.166606,1.729947,-0.357648\C,0,  
2.541686,2.044705,-0.587207\C,0,2.871435,3.366844,-0.854868\H,0,3.9202  
32,3.638935,-1.012725\C,0,1.8778,4.383402,-0.947264\C,0,0.50142,4.0566  
38,-0.666922\C,0,-0.478423,5.085616,-0.809599\H,0,-1.531745,4.846673,-  
0.637623\C,0,-0.116648,6.372473,-1.180468\H,0,-0.888677,7.141732,-1.29  
2788\C,0,1.244363,6.699645,-1.42358\H,0,1.517731,7.720958,-1.7104\C,0,  
2.219124,5.720826,-1.311437\H,0,3.270787,5.954763,-1.512885\C,0,-1.921  
889,-0.360087,4.605463\C,0,-1.576178,-1.614399,5.151615\H,0,-2.04697,-  
1.945026,6.083993\C,0,-0.641997,-2.444282,4.523918\H,0,-0.400224,-3.41  
3352,4.970665\C,0,-0.050615,-2.056622,3.298533\C,0,-0.383713,-0.793036  
,2.752458\H,0,0.0875,-0.44484,1.829588\C,0,-1.29206,0.037678,3.405505\  
H,0,-1.52323,1.015058,2.972407\C,0,0.901489,-2.948165,2.620381\C,0,1.7  
60375,-3.874738,3.42588\H,0,2.67556,-4.150214,2.880136\H,0,1.204104,-4  
.80331,3.651043\H,0,2.024746,-3.401339,4.383722\H,0,0.994682,-2.882512  
,1.311177\H,0,0.324887,-2.248724,0.745266\C,0,1.855139,-3.621699,0.439  
035\C,0,2.551866,-2.894836,-0.544812\H,0,2.49388,-1.803106,-0.56625\C,  
0,3.336754,-3.582766,-1.477343\H,0,3.881387,-3.015547,-2.237515\C,0,3.  
428466,-4.983176,-1.431963\C,0,2.726524,-5.700108,-0.450337\H,0,2.7839  
87,-6.793202,-0.418634\C,0,1.929975,-5.025612,0.485561\H,0,1.348163,-5  
.58391,1.22388\C,0,3.608613,0.996298,-0.467499\C,0,4.261855,0.496822,-  
1.625299\C,0,4.009699,0.554009,0.823726\C,0,5.356848,-0.374327,-1.4658  
18\C,0,5.107279,-0.319659,0.928888\C,0,5.813982,-0.773933,-0.198342\H,  
0,5.8714,-0.743255,-2.360479\H,0,5.44029,-0.6468,1.92042\C,0,-3.933185  
,-0.156989,-0.907011\C,0,-4.239758,-1.388636,-0.262772\C,0,-4.298089,0  
.042403,-2.265475\C,0,-4.935155,-2.376646,-0.982545\C,0,-4.984536,-0.9  
8249,-2.944037\C,0,-5.319229,-2.196498,-2.323207\H,0,-5.174107,-3.3224  
21,-0.48274\H,0,-5.27192,-0.82947,-3.991676\H,0,4.044648,-5.515525,-2.  
164138\C,0,-2.943499,0.534367,5.261085\H,0,-3.83936,0.626133,4.618619\  
H,0,-3.260319,0.142854,6.241627\H,0,-2.545488,1.555599,5.39786\C,0,-3.  
991988,1.344923,-3.007032\H,0,-3.435169,2.003831,-2.319846\C,0,-3.8191  
9,-1.674398,1.180342\C,0,-6.062029,-3.28908,-3.087411\H,0,-6.250925,-2  
.900513,-4.105952\C,0,-5.019746,-1.589226,2.145714\H,0,-4.695944,-1.77

0254,3.187218\H,0,-5.504283,-0.598068,2.104829\H,0,-5.783543,-2.34802,  
1.892152\C,0,-7.42873,-3.607695,-2.447125\H,0,-7.306769,-4.023614,-1.4  
29838\H,0,-8.05612,-2.701652,-2.369994\H,0,-7.977034,-4.353934,-3.0511  
31\C,0,-5.204544,-4.564409,-3.224402\H,0,-5.727833,-5.322842,-3.835425  
\H,0,-4.23493,-4.344246,-3.705733\H,0,-4.997827,-5.012938,-2.235116\C,  
0,-3.093255,1.104761,-4.237228\H,0,-3.605615,0.488957,-4.999355\H,0,-2  
.82519,2.067535,-4.710406\H,0,-2.160253,0.594503,-3.944517\C,0,-5.2897  
81,2.086871,-3.388688\H,0,-5.056873,3.052718,-3.873738\H,0,-5.901101,1  
.494229,-4.093986\H,0,-5.906618,2.292568,-2.495118\C,0,7.041335,-1.668  
246,-0.036983\H,0,7.234058,-1.75515,1.049069\C,0,3.814415,0.898727,-3.  
032118\H,0,2.830559,1.389221,-2.935002\C,0,3.306341,1.061221,2.08535\H  
,0,2.261591,1.28576,1.810874\C,0,6.796689,-3.090636,-0.579221\H,0,7.68  
6189,-3.726673,-0.415904\H,0,5.937788,-3.566892,-0.075904\H,0,6.588922  
,-3.073458,-1.66478\C,0,8.290385,-1.035431,-0.683541\H,0,8.174781,-0.9  
51765,-1.779765\H,0,8.478202,-0.022687,-0.28394\H,0,9.185737,-1.653413  
,-0.487299\C,0,3.257473,0.020442,3.218168\H,0,2.879269,-0.950454,2.854  
858\H,0,4.252618,-0.148022,3.668367\H,0,2.586867,0.3696,4.023263\C,0,3  
.944829,2.377967,2.577633\H,0,3.921031,3.151992,1.790715\H,0,3.402426,  
2.768073,3.458622\H,0,4.999877,2.216261,2.866273\C,0,4.79577,1.912476,  
-3.656813\H,0,4.901606,2.813288,-3.027145\H,0,5.800162,1.465412,-3.778  
703\H,0,4.443054,2.232752,-4.654588\C,0,3.616055,-0.321392,-3.9526\H,0  
,3.238195,0.008207,-4.937984\H,0,4.563033,-0.864439,-4.12729\H,0,2.873  
659,-1.011813,-3.520984\C,0,-3.098062,-3.029848,1.322043\H,0,-3.776786  
,-3.879828,1.123778\H,0,-2.245072,-3.086189,0.626422\H,0,-2.715084,-3.  
14706,2.351861\H,0,-3.096704,-0.894935,1.472031\Version=ES64L-G09RevD  
.01\State=1-A\HF=-3216.0960396\RMSD=2.058e-09\Dipole=1.0498946,-2.3514  
819,5.2624789\Quadrupole=-9.5013742,13.4643226,-3.9629484,-13.5367305,  
-6.4079337,-15.0884697\PG=C01 [X(C65H72N1O4P1)]\@

### Conf3

1\1\GINC-WORKER2\SPIRTPSS\def2SVP\C65H72N1O4P1\JHIOE\06-May-2019\0  
\#p tpsstps\def2svp int=ultrafine empirical\dispersion=gd3 scrf=(smd,  
solvent=ch2cl2,read,externaliteration,dovacuum)\title\0,1\P,0,-0.090  
393,-0.541341,-1.174492\O,0,-1.350103,0.526771,-1.454139\O,0,0.836758,  
0.400252,-0.103878\O,0,0.584213,-0.744615,-2.498014\O,0,-0.548967,-1.6  
78426,-0.266704\C,0,-1.263845,2.268832,0.181636\C,0,-1.942186,1.19706,  
-0.404913\C,0,-3.267009,0.808618,-0.031728\C,0,-3.891736,1.528175,0.97  
8073\H,0,-4.917402,1.274986,1.265318\C,0,-3.223964,2.573342,1.678608\C  
,0,-1.880435,2.939244,1.300527\C,0,-1.201052,3.916347,2.089683\H,0,-0.  
165787,4.172117,1.847347\C,0,-1.825543,4.52711,3.167591\H,0,-1.278623,  
5.266249,3.76327\C,0,-3.164424,4.19731,3.509972\H,0,-3.648308,4.690872  
,4.359759\C,0,-3.844972,3.235422,2.780192\H,0,-4.868532,2.951338,3.049  
776\C,0,0.078615,2.667111,-0.330283\C,0,1.105922,1.719156,-0.405246\C,  
0,2.462225,2.067911,-0.689656\C,0,2.743837,3.391516,-1.001459\H,0,3.77  
8809,3.688438,-1.200747\C,0,1.718256,4.376559,-1.085267\C,0,0.36228,4.  
017047,-0.750645\C,0,-0.652987,5.012094,-0.886043\H,0,-1.692441,4.7449  
43,-0.674527\C,0,-0.342615,6.299489,-1.299041\H,0,-1.140629,7.042724,-  
1.404642\C,0,0.999586,6.66072,-1.593823\H,0,1.23242,7.682644,-1.912531  
\C,0,2.006985,5.714345,-1.491409\H,0,3.043903,5.974773,-1.732839\C,0,-  
1.762359,-0.333249,4.717655\C,0,-1.343062,-1.555447,5.284581\H,0,-1.76  
5546,-1.879488,6.24214\C,0,-0.395245,-2.361632,4.646254\H,0,-0.095295,  
-3.306132,5.109864\C,0,0.135683,-1.983554,3.390664\C,0,-0.272199,-0.75  
2068,2.82254\H,0,0.151361,-0.410648,1.874398\C,0,-1.19352,0.056438,3.4  
85071\H,0,-1.48287,1.010085,3.034723\C,0,1.101822,-2.852306,2.702727\C  
,0,2.031586,-3.714957,3.501162\H,0,2.937013,-3.967451,2.928421\H,0,1.5  
26347,-4.659247,3.775681\H,0,2.310341,-3.200263,4.433238\N,0,1.14428,-  
2.821242,1.389902\H,0,0.426483,-2.234905,0.831551\C,0,2.00202,-3.55293  
6,0.508707\C,0,2.642569,-2.830492,-0.515509\H,0,2.548722,-1.741904,-0.  
563241\C,0,3.417927,-3.518772,-1.45581\H,0,3.919458,-2.955712,-2.24782  
3\C,0,3.55614,-4.913839,-1.377821\C,0,2.910595,-5.626188,-0.355068\H,0,  
3.004738,-6.715642,-0.297006\C,0,2.123765,-4.951909,0.589082\H,0,1.58  
4898,-5.507435,1.361319\C,0,3.563628,1.055417,-0.578293\C,0,4.191929,0  
.542321,-1.743659\C,0,4.018945,0.660739,0.710352\C,0,5.316326,-0.29324  
4,-1.597693\C,0,5.144645,-0.177808,0.802031\C,0,5.826595,-0.643574,-0.  
33592\H,0,5.811885,-0.671926,-2.499058\H,0,5.519143,-0.467672,1.790306  
\C,0,-3.954991,-0.322138,-0.734553\C,0,-4.21732,-1.538027,-0.046037\C,  
0,-4.36713,-0.169834,-2.087684\C,0,-4.924413,-2.55639,-0.714403\C,0,-5  
.060202,-1.221271,-2.712287\C,0,-5.359786,-2.420721,-2.042182\H,0,-5.1  
36368,-3.49367,-0.185753\H,0,-5.381105,-1.095826,-3.753114\H,0,4.16505  
1,-5.445613,-2.11647\C,0,-2.797231,0.536664,5.385513\H,0,-3.722285,0.5  
64081,4.779294\H,0,-3.055091,0.166539,6.391319\H,0,-2.442137,1.579078,  
5.470161\C,0,-4.104441,1.112656,-2.879673\H,0,-3.533579,1.801353,-2.23  
4774\C,0,-3.737665,-1.77886,1.386639\C,0,-6.116747,-3.548967,-2.737656  
\H,0,-6.264066,-4.349022,-1.987874\C,0,-4.901059,-1.697252,2.396646\H,  
0,-4.531413,-1.847277,3.427728\H,0,-5.407726,-0.717364,2.35355\H,0,-5.  
657863,-2.477592,2.192205\C,0,-5.29617,-4.144183,-3.900844\H,0,-5.1266

4,-3.392854,-4.694167\H,0,-4.309163,-4.497647,-3.552858\H,0,-5.827996,  
-5.000431,-4.355336\C,0,-7.510107,-3.094349,-3.218123\H,0,-8.065225,-3  
.941874,-3.660553\H,0,-8.109496,-2.690614,-2.382487\H,0,-7.430836,-2.3  
06896,-3.990304\C,0,-3.244823,0.841921,-4.131346\H,0,-3.772722,0.18988  
8,-4.851645\H,0,-3.00992,1.790372,-4.64894\H,0,-2.293696,0.35761,-3.85  
3145\C,0,-5.424222,1.8252,-3.241049\H,0,-5.220923,2.778282,-3.763266\H  
0,-6.049952,1.20279,-3.907052\H,0,-6.014662,2.050806,-2.334535\C,0.7  
0867,-1.494518,-0.191278\H,0,7.31354,-1.549551,0.890279\C,0,3.686265,0  
.893402,-3.144462\H,0,2.695478,1.364794,-3.026066\C,0,3.33999,1.183056  
,1.979426\H,0,2.27892,1.359501,1.733968\C,0,6.874788,-2.936232,-0.6945  
56\H,0,7.789489,-3.538451,-0.542773\H,0,6.046509,-3.428887,-0.157116\H  
0,6.636819,-2.950855,-1.773916\C,0,8.295183,-0.836922,-0.888572\H,0,8  
.144643,-0.782521,-1.98241\H,0,8.461818,0.19017,-0.51715\H,0,9.215266,  
-1.421862,-0.705879\C,0,3.3668,0.180294,3.146894\H,0,3.004676,-0.81319  
1,2.831554\H,0,4.38287,0.05646,3.563701\H,0,2.716708,0.5373,3.965261\C  
0,3.942962,2.53816,2.408664\H,0,3.866591,3.284781,1.598929\H,0,3.4125  
66,2.936519,3.293234\H,0,5.011556,2.42547,2.669511\C,0,4.620256,1.9105  
94,-3.83253\H,0,4.728251,2.830525,-3.231306\H,0,5.629587,1.482889,-3.9  
80399\H,0,4.223281,2.195326,-4.824435\C,0,3.483026,-0.356833,-4.0224\H  
0,3.068507,-0.063449,-5.004492\H,0,4.434445,-0.887215,-4.211203\H,0,2  
.767559,-1.046755,-3.547146\C,0,-2.978977,-3.113494,1.530161\H,0,-3.64  
377,-3.98331,1.375537\H,0,-2.151644,-3.164486,0.803847\H,0,-2.554883,-  
3.198084,2.54712\H,0,-3.022821,-0.976835,1.631844\Version=ES64L-G09Re  
vD.01\State=1-AIHF=-3216.0960294\IRMSD=2.052e-09\Dipole=1.3180727,-2.12  
30292,5.2663943\Quadrupole=-8.9319945,11.2411187,-2.3091242,-14.992139  
8,-5.0747244,-15.696795\PG=C01 [X(C65H72N1O4P1)]\@

### TRIP/1E Type III.1

1\1\GINC-WORKER1\SP\IRTPSS\def2SVP\C65H72N1O4P1\JHIOE\27-Mar-2019\0  
\#p tpsstps\def2svp int=ultrafine empiricaldispersion=gd3 scrf=(smd,  
solvent=ch2cl2,read,externaliteration,dovacuum)\title\0,1\H,0,-5.712  
31,0.551506,-2.0845\C,0,-5.217347,0.454445,-1.110205\C,0,-4.140798,1.3  
05227,-0.80799\C,0,-5.703145,-0.49898,-0.195541\C,0,-3.503063,1.185282  
,0.457582\C,0,-3.725315,2.370052,-1.825077\C,0,-5.030883,-0.626222,1.0  
29857\C,0,-6.953155,-1.306385,-0.545022\C,0,-2.42593,2.147774,0.85695\  
C,0,-3.930427,0.184386,1.371492\C,0,-4.860968,3.387137,-2.062421\C,0,-  
3.243194,1.746094,-3.149402\H,0,-2.875635,2.930265,-1.400273\H,0,-5.17  
4929,3.86192,-1.115281\H,0,-5.748612,2.903864,-2.510859\H,0,-4.528172,  
4.185379,-2.751306\H,0,-2.89849,2.536293,-3.841821\H,0,-4.055396,1.190  
618,-3.653172\H,0,-2.402716,1.055504,-2.970615\H,0,-5.366268,-1.37636,  
1.75267\C,0,-8.201823,-0.395391,-0.504575\C,0,-7.168786,-2.549115,0.33  
2149\H,0,-6.827527,-1.64689,-1.590917\H,0,-8.090667,0.471759,-1.179232  
\H,0,-8.368168,-0.01002,0.518567\H,0,-9.105163,-0.954128,-0.811629\H,0  
,-7.416856,-2.272411,1.373458\H,0,-6.273674,-3.194138,0.356186\H,0,-8.  
010507,-3.147846,-0.05939\C,0,-1.137088,2.130885,0.237809\C,0,-2.65269  
4,3.093675,1.849275\C,0,-3.242342,-0.042412,2.720695\C,0,-0.927382,1.2  
4762,-0.802506\C,0,-0.10798,3.008405,0.59368\H,0,-3.640855,3.153937,2.  
316966\C,0,-1.626806,3.968707,2.306727\C,0,-2.83326,-1.515782,2.922745  
\C,0,-4.124488,0.444851,3.889406\H,0,-2.313553,0.552578,2.725203\H,0,-  
2.270968,-1.626423,3.86844\H,0,-2.185669,-1.849489,2.097376\H,0,-3.712  
786,-2.183394,2.979935\H,0,-3.600558,0.312914,4.854166\H,0,-4.383492,  
5.13091,3.785832\H,0,-5.069366,-0.128315,3.936357\H,0,0.024963,-0.1127  
46,-0.558885\C,0,1.18566,2.95481,-0.143659\C,0,-0.321382,3.912207,1.69  
657\C,0,-1.859456,4.882297,3.379062\O,0,-0.637989,-1.043995,0.45019\O,  
0,0.442926,-0.593453,-1.923892\O,0,1.291191,0.597333,0.290182\C,0,1.86  
9025,1.737737,-0.238549\C,0,1.766758,4.119052,-0.764902\C,0,0.711303,4  
.737011,2.23804\H,0,-2.860187,4.920213,3.824412\C,0,-0.841782,5.690978  
,3.859415\C,0,3.183948,1.626376,-0.78989\C,0,1.076792,5.365092,-0.8697  
3\C,0,3.087997,4.021611,-1.334318\H,0,1.719887,4.67292,1.820215\C,0,0.  
457467,5.603986,3.290717\H,0,-1.030564,6.384838,4.685912\C,0,3.775632,  
2.774443,-1.29904\C,0,3.917514,0.319321,-0.751717\H,0,0.057407,5.44422  
,-0.480791\C,0,1.673064,6.465077,-1.468648\C,0,3.679461,5.176415,-1.93  
01\H,0,1.268285,6.22248,3.691318\H,0,4.795324,2.724908,-1.694251\C,0,4  
.463858,-0.134912,0.479888\C,0,4.097262,-0.443371,-1.936127\H,0,1.1205  
83,7.408177,-1.544071\C,0,2.99088,6.377503,-1.992591\H,0,4.688617,5.08  
904,-2.348807\C,0,5.19731,-1.335516,0.499726\C,0,4.307139,0.670098,1.7  
72286\C,0,4.852842,-1.629645,-1.865876\C,0,3.507492,0.000032,-3.276822  
\H,0,3.453025,7.255511,-2.456998\H,0,5.62096,-1.679258,1.450826\C,0,5.  
41594,-2.093282,-0.665503\C,0,5.6759,1.131322,2.31387\C,0,3.508777,-0.  
099487,2.842554\H,0,3.732543,1.580887,1.53345\H,0,5.54296,1.762643,3.2  
11557\H,0,6.224673,1.721477,1.5579\H,0,6.309492,0.270971,2.598242\H,0,  
3.361238,0.532416,3.737787\H,0,4.039556,-1.014128,3.163075\H,0,2.51655  
1,-0.388831,2.458192\H,0,5.011102,-2.217028,-2.778191\C,0,4.580317,0.66  
8824,-4.162686\C,0,2.825261,-1.15497,-4.035107\H,0,2.72548,0.746581,-3  
.056585\H,0,4.137943,1.013369,-5.115793\H,0,5.037698,1.541057,-3.66456  
7\H,0,5.390151,-0.045491,-4.40261\H,0,2.309686,-0.761962,-4.9307\H,0,2  
.072663,-1.643925,-3.396469\H,0,3.555145,-1.909563,-4.381889\C,0,6.232

864,-3.383248,-0.642177\C,0,7.643648,-3.163895,-0.059771\C,0,5.494758,  
-4.511189,0.107631\H,0,6.350503,-3.704853,-1.69421\H,0,7.598879,-2.879  
524,1.007736\H,0,8.18077,-2.365061,-0.601885\H,0,8.241614,-4.090645,-0  
.133315\H,0,5.35467,-4.2542,1.172832\H,0,6.073209,-5.452389,0.060903\H  
,0,4.498449,-4.698239,-0.32989\H,0,-5.368708,-2.688743,-3.968513\C,0,-  
4.574688,-2.844753,-3.230768\C,0,-3.364051,-2.142045,-3.33877\C,0,-4.7  
73963,-3.732776,-2.162535\H,0,-3.207999,-1.435232,-4.159728\C,0,-2.345  
334,-2.336144,-2.397979\H,0,-5.727193,-4.26002,-2.055216\C,0,-3.766704  
,-3.934937,-1.209398\H,0,-1.394618,-1.795554,-2.473675\C,0,-2.543217,-  
3.252589,-1.346806\H,0,-3.944203,-4.591086,-0.354196\H,0,-1.468529,-3.  
408828,-0.416791\C,0,-0.98909,-4.517979,0.101815\H,0,-1.04031,-2.46484  
8,-0.095288\C,0,-1.566988,-5.867845,-0.198602\C,0,0.178772,-4.416968,0  
.991379\H,0,-2.324491,-6.132302,0.562205\H,0,-2.058468,-5.886202,-1.18  
386\H,0,-0.773756,-6.629507,-0.163137\C,0,0.299726,-5.29013,2.099502\C  
,0,1.206082,-3.475074,0.750955\H,0,-0.477895,-6.033995,2.298488\C,0,1.  
387444,-5.181516,2.967819\H,0,1.171075,-2.834609,-0.133895\C,0,2.30350  
2,-3.397637,1.610735\H,0,1.450188,-5.847668,3.835617\C,0,2.407197,-4.2  
29581,2.745069\H,0,3.098599,-2.680581,1.389268\C,0,3.565382,-4.10036,3  
.703011\H,0,3.91352,-5.088827,4.050079\H,0,3.255882,-3.530575,4.600165  
\H,0,4.412804,-3.565968,3.244565\Version=ES64L-G09RevD.01\State=1-A\H  
F=-3216.0898631\RMSD=5.297e-09\Dipole=-1.2847597,-4.7048372,1.2564765\  
Quadrupole=-5.0187217,26.9891532,-21.9704314,14.9074858,11.1982848,-7.  
1062127\PG=C01 [X(C65H72N1O4P1)]\@

### TRIP/1E Type III.2

1\1\GINC-WORKER2\SP\RTSPSTPSS\def2SVP\C65H72N1O4P1\JHIOE\27-Mar-2019\0  
\#p tpsstps\def2svp int=ultrafine empirical\dispersion=gd3 scrf=(smd,  
solvent=ch2cl2,read,externaliteration,dovacuum)\title\0,1\P,0,0.1771  
26,-0.16514,-0.393091\C,0,-0.60123,1.287684,-0.753639\C,0,1.508061,0.4  
672,0.424385\C,0,0.540274,-0.785479,-1.710831\C,0,-0.597575,-0.909954,  
0.68035\C,0,0.412979,3.042288,0.519768\C,0,-0.709295,2.264679,0.215221  
\C,0,-1.992989,2.476696,0.808751\C,0,-2.120315,3.519287,1.717083\H,0,-  
3.1006,3.736591,2.153462\C,0,-1.004065,4.307122,2.120215\C,0,0.292832,  
4.051997,1.542681\C,0,1.407269,4.797432,2.035136\H,0,2.406299,4.584585  
,1.644291\C,0,1.24312,5.774,3.006635\H,0,2.115023,6.328554,3.370867\C,  
0,-0.043506,6.056097,3.53898\H,0,-0.160304,6.834836,4.300557\C,0,-1.14  
1657,5.329168,3.107756\H,0,-2.135958,5.518492,3.528317\C,0,1.699663,2.  
777864,-0.185401\C,0,2.226499,1.482036,-0.177438\C,0,3.519449,1.159949  
,-0.696914\C,0,4.257224,2.181195,-1.279331\H,0,5.263705,1.973373,-1.65  
6693\C,0,3.732498,3.498837,-1.41974\C,0,2.429167,3.807377,-0.883509\C,  
0,1.904896,5.118114,-1.097955\H,0,0.901657,5.357225,-0.733689\C,0,2.64  
0261,6.08286,-1.770959\H,0,2.212132,7.078962,-1.928479\C,0,3.939626,5.  
788068,-2.2639\H,0,4.512868,6.560453,-2.788245\C,0,4.469368,4.518622,-  
2.094425\H,0,5.462111,4.27148,-2.487562\C,0,4.052042,-0.234865,-0.5597  
01\C,0,4.141199,-1.089865,-1.69361\C,0,4.468258,-0.699937,0.716127\C,0  
,4.662515,-2.385349,-1.525379\C,0,4.986744,-2.003875,0.829936\C,0,5.09  
3903,-2.863767,-0.274878\H,0,4.734731,-3.042906,-2.39901\H,0,5.318625,  
-2.362151,1.812139\C,0,-3.164795,1.614547,0.444378\C,0,-3.674233,0.672  
06,1.377699\C,0,-3.790636,1.765123,-0.823223\C,0,-4.832768,-0.057569,1  
.045406\C,0,-4.933127,0.99986,-1.112715\C,0,-5.486858,0.09565,-0.18721  
\H,0,-5.227119,-0.76856,1.777248\H,0,-5.419145,1.120549,-2.088705\C,0,  
-3.273777,2.759519,-1.864496\H,0,-2.403322,3.279166,-1.429152\C,0,-3.0  
07677,0.433343,2.735563\C,0,-6.777508,-0.644102,-0.540031\H,0,-6.66175  
3,-0.999226,-1.581967\C,0,-3.761402,1.164384,3.867484\H,0,-3.822027,2.  
250578,3.684543\H,0,-4.794382,0.779886,3.961037\H,0,-3.252161,1.009994  
,4.836863\C,0,-7.977157,0.330447,-0.519255\H,0,-7.811384,1.18772,-1.19  
5344\H,0,-8.903918,-0.181964,-0.83701\H,0,-8.137179,0.728496,0.500016\  
C,0,-7.063986,-1.869207,0.341518\H,0,-7.298599,-1.576178,1.38148\H,0,-  
7.936963,-2.421441,-0.050298\H,0,-6.206056,-2.563067,0.366904\C,0,-2.7  
8735,2.048744,-3.14346\H,0,-1.99545,1.320613,-2.902973\H,0,-3.614526,1  
.517739,-3.649607\H,0,-2.373838,2.78424,-3.858181\C,0,-4.328912,3.8382  
12,-2.184975\H,0,-3.915201,4.589205,-2.882988\H,0,-5.22613,3.398611,-2  
.658517\H,0,-4.651896,4.364099,-1.268281\C,0,5.657463,-4.273914,-0.120  
181\H,0,5.905676,-4.407796,0.949715\C,0,3.705355,-0.628592,-3.086148\H  
,0,3.069521,0.263147,-2.95088\C,0,4.385067,0.179211,1.96528\H,0,3.9483  
33,1.14762,1.668081\C,0,4.618019,-5.348931,-0.499383\H,0,4.344002,-5.2  
79375,-1.568266\H,0,5.02316,-6.36223,-0.321929\H,0,3.693482,-5.240023,  
0.094458\C,0,6.958264,-4.453834,-0.929347\H,0,7.716813,-3.70536,-0.638  
293\H,0,7.386646,-5.459387,-0.763033\H,0,6.770703,-4.343125,-2.013344\  
C,0,3.455278,-0.432799,3.032859\H,0,3.341773,0.260775,3.886471\H,0,2.4  
54289,-0.627922,2.612932\H,0,3.8607,-1.383164,3.425658\C,0,5.786476,0.  
475432,2.537658\H,0,6.434547,0.947144,1.777093\H,0,5.715324,1.163426,3  
.40019\H,0,6.285545,-0.448575,2.883756\C,0,4.929709,-0.222418,-3.93472  
2\H,0,5.592336,-1.091177,-4.107108\H,0,4.610399,0.162757,-4.920841\H,0  
,5.527283,0.561941,-3.43878\C,0,2.854756,-1.679631,-3.825247\H,0,2.481  
332,-1.258712,-4.777133\H,0,3.439125,-2.584338,-4.074967\H,0,1.984884,

-1.966465,-3.213103\C,0,-2.866788,-1.065159,3.070543\H,0,-2.252765,-1.193801,3.980628\H,0,-3.846473,-1.539208,3.265339\H,0,-2.373321,-1.601801,2.24719\H,0,-1.987271,0.849396,2.676156\C,0,-4.394121,-2.324041,-2.986389\C,0,-3.072501,-1.897479,-2.728531\H,0,-2.634093,-1.097533,-3.333736\C,0,-2.304893,-2.478803,-1.720937\H,0,-1.271177,-2.142405,-1.591188\C,0,-2.837648,-3.526686,-0.929372\C,0,-4.15174,-3.977809,-1.20025\H,0,-4.594004,-4.78209,-0.60497\C,0,-4.915732,-3.374266,-2.203159\H,0,-5.940741,-3.719286,-2.376736\C,0,-2.042375,-4.16268,0.130858\C,0,-2.311137,-5.588349,0.510714\H,0,-1.433386,-6.052906,0.984684\H,0,-2.602451,-6.16798,-0.378219\H,0,-3.149429,-5.631146,1.230331\N,0,-1.091651,-3.466703,0.713571\H,0,-0.949884,-2.413026,0.497999\C,0,-0.178668,-3.893436,1.730052\C,0,-0.626253,-4.461955,2.93571\H,0,-1.695661,-4.610315,3.108838\C,0,0.310682,-4.802388,3.921425\H,0,-0.034894,-5.241385,4.863238\C,0,1.678544,-4.569771,3.709209\C,0,2.112935,-3.981807,2.509849\H,0,3.1761,-3.7859,2.342826\C,0,1.18772,-3.629951,1.519087\H,0,1.514046,-3.161043,0.585996\H,0,2.405947,-4.836384,4.483184\C,0,-5.208387,-1.6695,-4.07293\H,0,-6.227688,-2.084671,-4.127276\H,0,-5.280418,-0.580559,-3.89948\H,0,-4.724286,-1.803584,-5.058165\Version=ES64L-G09RevD.01\State=1-A\HF=-3216.0905493\IRMSD=5.168e-09\Dipole=-2.7069863,-4.2381048,0.9582992\Quadrupole=0.0261353,18.6984818,-18.7246171,21.4205092,9.5593468,-10.2331119\PG=C01 [X(C65H72N1O4P1)]\@\

## TRIP/1E Switching TS

### Conf0

1\1\GINC-WORKER2\SP\IRTPSS\def2SVP\C65H72N1O4P1\JHIOE\26-Mar-2019\0  
\\#p tpsstps\def2svp int=ultrafine empirical\dispersion=gd3 scrf=(smd,  
solvent=ch2cl2,read,externaliteration,dovacuum)\title\0,1\P,0,0.0347  
82,-0.165131,-0.152115\O,0,1.395118,0.615765,0.456654\O,0,-0.826611,1.19423,-0.662953\O,0,-0.625713,-0.817496,1.040829\O,0,0.317299,-0.973243,-1.399012\C,0,1.351228,2.899856,-0.272484\C,0,1.98252,1.65199,-0.235017\C,0,3.271277,1.411134,-0.807025\C,0,3.900111,2.460424,-1.462631\H,0,4.897848,2.30996,-1.888631\C,0,3.267375,3.727401,-1.623785\C,0,1.966006,3.952863,-1.041553\C,0,1.327911,5.207524,-1.281533\H,0,0.323092,5.477904,-0.884041\C,0,1.95485,6.200821,-2.019577\H,0,1.347723,7.152252,-2.195457\C,0,3.253765,5.991777,-2.555978\H,0,3.741232,6.786757,-3.130902\C,0,3.891614,4.776185,-2.364417\H,0,4.884909,4.594878,-2.791038\C,0,0.077948,3.091445,0.478858\C,0,-0.988481,2.214664,0.25447\C,0,-2.26424,2.35618,0.888059\C,0,-2.43437,3.41356,1.771162\H,0,-3.410905,3.574055,2.239146\C,0,-1.364094,4.29248,2.107361\C,0,-0.078521,4.122575,1.475144\C,0,0.995639,4.964708,1.895611\H,0,1.988817,4.819931,1.461124\C,0,0.801391,5.949359,2.853338\H,0,1.643463,6.578019,3.163334\C,0,-0.477145,6.14448,3.441148\H,0,-0.618867,6.930265,4.191178\C,0,-1.535202,5.32691,3.076404\H,0,-2.520897,5.451176,3.539352\C,0,-3.380599,1.409513,0.556978\C,0,-3.766417,0.39074,1.473954\C,0,-4.060068,1.541095,-0.681035\C,0,-4.831272,-0.456868,1.126023\C,0,-5.116217,0.657797,-0.986085\C,0,-5.522174,-0.349607,-0.096511\H,0,-5.140171,-1.234339,1.834327\H,0,-5.62806,0.773603,-1.946566\C,0,3.899003,0.058863,-0.662256\C,0,4.021328,-0.801348,-1.788542\C,0,4.356021,-0.370854,0.612701\C,0,4.60803,-2.068321,-1.614431\C,0,4.942555,-1.644713,0.731872\C,0,5.075215,-2.512328,-0.364831\H,0,4.701351,-2.729243,-2.484023\H,0,5.307356,-1.974821,1.71234\C,0,4.252301,0.517971,1.85379\H,0,3.74548,1.452205,1.559324\C,0,3.544717,-0.389383,-3.183504\C,0,5.702382,-3.89393,-0.198682\H,0,5.973102,-4.000099,0.869016\C,0,4.745837,-0.116287,-4.112977\H,0,5.415963,0.654386,-3.691807\H,0,5.343173,-1.034112,-4.267986\H,0,4.40043,0.234442,-5.103072\C,0,6.996515,-4.031905,-1.026487\H,0,7.724794,-3.243881,-0.763606\H,0,7.472893,-5.013473,-0.847739\H,0,6.786657,-3.952557,-2.109186\C,0,4.70201,-5.016596,-0.543161\H,0,4.404266,-4.972532,-1.607003\H,0,5.151955,-6.009949,-0.361031\H,0,3.785583,-4.937176,0.067758\C,0,3.399063,-0.136749,2.959014\H,0,2.398116,-0.396808,2.577222\H,0,3.877927,-1.054359,3.34563\H,0,3.274246,0.558682,3.809561\C,0,5.649321,0.909516,2.378967\H,0,5.560817,1.601657,3.236598\H,0,6.215387,0.022441,2.718622\H,0,6.243485,1.41232,1.594725\C,0,-6.657383,-1.332812,-0.396569\H,0,-7.316098,-1.327375,0.494822\C,0,-3.074852,0.218841,2.828633\H,0,-2.080942,0.689451,2.742991\C,0,-3.68988,2.637435,-1.682661\H,0,-2.858451,3.218999,-1.249717\C,0,-7.51647,-0.947716,-1.610518\H,0,-6.935192,-0.992848,-2.549846\H,0,-8.364331,-1.648107,-1.713818\H,0,-7.929611,0.072226,-1.513456\C,0,-6.119704,-2.774612,-0.547685\H,0,-5.534566,-3.081992,0.336493\H,0,-6.955354,-3.488622,-0.666636\H,0,-5.467257,-2.859491,-1.434175\C,0,-3.189011,2.056534,-3.019389\H,0,-2.843159,2.868476,-3.685341\H,0,-2.34572,1.36506,-2.854252\H,0,-3.994048,1.51418,-3.548327\C,0,-4.86001,3.618404,-1.900332\H,0,-5.186075,4.06813,-0.945194\H,0,-4.557804,4.437516,-2.578665\H,0,-5.73219,3.111763,-2.353347\C,0,-3.863027,0.936457,3.946023\H,0,-4.8677,0.488842,4.064869\H,0,-3.334414,0.847131,4.91321\H,0,-3.997567,2.00997,3.730229\C,0,-2.842238,-1.257976,3.201445\H,0,-2.220855,-1.323161,4.113605\H,0,-3.789612,-1.787703,3.413655\H,0

-.2.307888,-1.777944,2.39209\C,0,2.580322,-1.420625,-3.802364\H,0,2.22  
5823,-1.06323,-4.787197\H,0,3.071073,-2.398414,-3.963239\H,0,1.705131,  
-1.560087,-3.146214\H,0,2.981548,0.553464,-3.079022\C,0,1.695809,-3.94  
1035,3.341706\C,0,0.443036,-4.459186,3.7391\H,0,0.310871,-4.824163,4.7  
63591\C,0,-0.632039,-4.511891,2.850791\H,0,-1.59072,-4.906073,3.198842  
\C,0,-0.496914,-4.023504,1.527638\C,0,0.761401,-3.505219,1.125875\H,0,  
0.914965,-3.148088,0.1024\C,0,1.83326,-3.476085,2.015819\H,0,2.794403,  
-3.078829,1.676271\C,0,-1.61377,-4.059379,0.582176\C,0,-2.721921,-5.05  
2504,0.728196\H,0,-3.023038,-5.101359,1.787457\H,0,-2.373688,-6.062608  
,0.446811\H,0,-3.59717,-4.787234,0.118716\N,0,-1.604478,-3.176801,-0.4  
02341\H,0,-0.943675,-2.378492,-0.295389\C,0,-2.405532,-3.118456,-1.578  
136\C,0,-2.714378,-4.282657,-2.308361\H,0,-2.345675,-5.25665,-1.976569  
\C,0,-3.462007,-4.1758,-3.487633\H,0,-3.698474,-5.080465,-4.057323\C,0  
-3.885232,-2.918264,-3.946674\C,0,-3.556632,-1.762349,-3.22084\H,0,-3  
.886226,-0.780616,-3.570546\C,0,-2.818399,-1.852728,-2.035451\H,0,-2.5  
84749,-0.954714,-1.458357\H,0,-4.464254,-2.838021,-4.872534\C,0,2.8455  
43,-3.856436,4.31255\H,0,2.80809,-4.668387,5.058555\H,0,3.816575,-3.89  
1144,3.791147\H,0,2.800106,-2.898729,4.866083\Version=ES64L-G09RevD.0  
1\State=-1\A\HF=-3216.0860407\IRMSD=4.893e-09\Dipole=-1.7733435,-4.49895  
5,0.994833\Quadrupole=-9.1398178,22.5881989,-13.4483811,16.5807397,9.9  
252408,-8.5907668\PG=C01 [X(C65H72N1O4P1)]\@

### Conf1

1\1\GINC-WORKER1\SP\RTSPSTPSS\def2SVP\C65H72N1O4P1\JHIOE\29-Mar-2019\0  
\#p tpsstps\def2svp int=ultrafine empirical\dispersion=gd3 scrf=(smd,  
solvent=ch2cl2,read,externaliteration,dovacuum)\title\0,1\P,0,0.0317  
69,-0.176859,-0.219803\O,0,1.418689,0.536058,0.414616\O,0,-0.77859,1.2  
27426,-0.690323\O,0,-0.657435,-0.838211,0.951711\O,0,0.289369,-0.95859  
9,-1.488712\C,0,1.427718,2.8595,-0.184595\C,0,2.027652,1.595618,-0.220  
777\C,0,3.305467,1.355583,-0.817287\C,0,3.958949,2.425167,-1.413022\H,  
0,4.949277,2.273806,-1.855198\C,0,3.36249,3.716958,-1.490768\C,0,2.069  
433,3.941388,-0.890402\C,0,1.466791,5.226079,-1.051805\H,0,0.467383,5.  
400853,-0.643326\C,0,2.120949,6.245672,-1.727772\H,0,1.633384,7.220135  
,-1.842413\C,0,3.412696,6.034509,-2.280165\H,0,3.921687,6.849789,-2.80  
5861\C,0,4.01511,4.791424,-2.167589\H,0,5.001546,4.607846,-2.608852\C,  
0,0.151002,3.039016,0.564578\C,0,-0.933646,2.20553,0.273144\C,0,-2.219  
242,2.350659,0.885529\C,0,-2.382197,3.368657,1.81478\H,0,-3.36535,3.53  
3898,2.267031\C,0,-1.297018,4.201135,2.215762\C,0,-0.001497,4.024943,1  
.606142\C,0,1.083054,4.819839,2.08732\H,0,2.082047,4.667534,1.668912\C  
,0,0.890747,5.767804,3.081726\H,0,1.740392,6.361331,3.437034\C,0,-0.39  
6159,5.970708,3.648342\H,0,-0.53602,6.727629,4.42783\C,0,-1.464912,5.1  
95814,3.226108\H,0,-2.457912,5.325233,3.671714\C,0,-3.352219,1.453263,  
0.482006\C,0,-3.792002,0.405462,1.339442\C,0,-3.9883,1.660205,-0.77054  
8\C,0,-4.860597,-0.406805,0.918768\C,0,-5.058308,0.823355,-1.140625\C,  
0,-5.507103,-0.22057,-0.316219\H,0,-5.197592,-1.214768,1.577085\H,0,-5  
.551423,0.983291,-2.107331\C,0,3.903399,-0.017518,-0.766061\C,0,3.9709  
47,-0.812691,-1.941039\C,0,4.40067,-0.524261,0.466075\C,0,4.560196,-2.  
089954,-1.861773\C,0,4.975281,-1.807303,0.493793\C,0,5.070629,-2.60722  
1,-0.660003\H,0,4.623361,-2.705063,-2.767682\H,0,5.365395,-2.190344,1.  
444285\C,0,4.357283,0.301453,1.753497\H,0,3.848425,1.253785,1.528653\C  
,0,3.440335,-0.312001,-3.286507\C,0,5.712154,-3.991781,-0.614583\H,0,5.  
680149,-4.396117,-1.64385\C,0,4.603326,0.083266,-4.220875\H,0,5.25587  
3,0.843292,-3.755822\H,0,5.229848,-0.795026,-4.464616\H,0,4.216434,0.4  
98584,-5.169825\C,0,4.922722,-4.959261,0.290654\H,0,3.869614,-5.038007  
,-0.031395\H,0,5.367368,-5.97097,0.260701\H,0,4.932929,-4.619604,1.342  
57\C,0,7.192418,-3.916265,-0.187495\H,0,7.291203,-3.537955,0.846804\H,  
0,7.661464,-4.916648,-0.225796\H,0,7.765636,-3.243685,-0.850572\C,0,3.  
544401,-0.400309,2.859068\H,0,2.519853,-0.616916,2.514056\H,0,4.019624  
,-1.349191,3.165135\H,0,3.477686,0.243446,3.755562\C,0,5.780356,0.6526  
68,2.235756\H,0,5.738351,1.300315,3.130904\H,0,6.350539,-0.256314,2.50  
3376\H,0,6.344955,1.188862,1.45175\C,0,-6.670022,-1.112285,-0.74439\H,  
0,-6.890206,-0.869458,-1.801149\C,0,-3.152729,0.159865,2.708082\H,0,-2  
.149681,0.618015,2.682671\C,0,-3.548256,2.776538,-1.719625\H,0,-2.7021  
25,3.303745,-1.247493\C,0,-6.318569,-2.612033,-0.673633\H,0,-6.129279,  
-2.933688,0.366825\H,0,-7.152928,-3.222678,-1.064329\H,0,-5.418552,-2.  
838767,-1.270658\C,0,-7.935839,-0.801937,0.081586\H,0,-8.219776,0.2618  
83,-0.007334\H,0,-8.789167,-1.41559,-0.261722\H,0,-7.77002,-1.020259,1  
.15294\C,0,-3.043701,2.219374,-3.0655\H,0,-2.652124,3.037291,-3.698015  
\H,0,-2.231928,1.48962,-2.906314\H,0,-3.857571,1.72504,-3.627002\C,0,-  
4.668983,3.815858,-1.923816\H,0,-4.995392,4.243633,-0.95876\H,0,-4.315  
855,4.645185,-2.564017\H,0,-5.552674,3.365957,-2.413032\C,0,-3.974209,  
0.837952,3.826372\H,0,-4.988564,0.400581,3.885857\H,0,-3.484975,0.6975  
31,4.808128\H,0,-4.086523,1.921968,3.654658\C,0,-2.954855,-1.335526,3.  
021406\H,0,-2.374806,-1.450346,3.955533\H,0,-3.916381,-1.862265,3.1665  
36\H,0,-2.390611,-1.823382,2.212641\C,0,2.49795,-1.32398,-3.967179\H,0  
,2.096281,-0.893698,-4.903479\H,0,3.020903,-2.260833,-4.234265\H,0,1.6  
50249,-1.558023,-3.302213\H,0,2.845796,0.596007,-3.087808\C,0,1.603097

-.4.024179,3.193087\C,0,0.342626,-4.525481,3.587529\H,0,0.207476,-4.90  
1958,4.607467\C,0,-0.736852,-4.544562,2.703305\H,0,-1.701875,-4.922286  
,3.051638\C,0,-0.59754,-4.041606,1.386019\C,0,0.669637,-3.543003,0.986  
744\H,0,0.826488,-3.175166,-0.032372\C,0,1.744486,-3.543804,1.873064\H  
,0,2.711314,-3.160924,1.534453\C,0,-1.721413,-4.034314,0.448466\C,0,-2  
.860233,-4.9931,0.591063\H,0,-3.139041,-5.068198,1.654539\H,0,-2.55443  
3,-6.004348,0.267203\H,0,-3.739239,-4.676209,0.011601\N,0,-1.692569,-3  
.14139,-0.526797\H,0,-1.008789,-2.363599,-0.414938\C,0,-2.505693,-3.04  
1688,-1.691237\C,0,-2.863484,-4.184849,-2.43272\H,0,-2.521768,-5.17525  
7,-2.121227\C,0,-3.62703,-4.036466,-3.597119\H,0,-3.902376,-4.924547,-  
4.175401\C,0,-4.01705,-2.759369,-4.03129\C,0,-3.63766,-1.62511,-3.2964  
49\H,0,-3.937307,-0.627243,-3.62775\C,0,-2.882816,-1.756737,-2.125471\  
H,0,-2.609138,-0.874688,-1.541526\H,0,-4.60845,-2.647448,-4.946003\C,0  
,2.756291,-3.972974,4.161942\H,0,2.70557,-4.793067,4.898135\H,0,3.7251  
82,-4.018971,3.637602\H,0,2.7306,-3.021276,4.726917\Version=ES64L-G09  
RevD.01\State=-1\A\HF=-3216.0871784\RMSD=4.771e-09\Dipole=-1.8566272,-4  
.4193497,0.9127594\Quadrupole=-7.758896,21.7723652,-14.0134691,16.7206  
18,11.2113056,-7.0648878\PG=C01 [X(C65H72N1O4P1)]\@

## Conf2

1\1\GINC-WORKER2\SP\IRTPSS\def2SVP\C65H72N1O4P1\JHIOE\01-Apr-2019\0  
\#p tpsstps\def2svp int=ultrafine empirical\dispersion=gd3 scrf=(smd,  
solvent=ch2cl2,read,externaliteration,dovacuum)\title\0,1\P,0,0.0593  
84,-0.178424,-0.168572\O,0,1.407615,0.596532,0.472944\O,0,-0.788341,1.  
18385,-0.696524\O,0,-0.629622,-0.83046,1.008195\O,0,0.367884,-0.985082  
,-1.410367\C,0,1.36528,2.895659,-0.207176\C,0,2.002058,1.650386,-0.184  
761\C,0,3.303145,1.428222,-0.735448\C,0,3.942329,2.495551,-1.350364\H,  
0,4.949772,2.35926,-1.757751\C,0,3.309841,3.765133,-1.490316\C,0,1.994  
381,3.971138,-0.933112\C,0,1.358419,5.230356,-1.154738\H,0,0.343398,5.  
387445,-0.778416\C,0,2.000355,6.245544,-1.848863\H,0,1.487611,7.20018,  
-2.010856\C,0,3.312937,6.05511,-2.358089\H,0,3.812246,6.867269,-2.8977  
22\C,0,3.949151,4.835888,-2.185412\H,0,4.953183,4.668718,-2.592179\C,0  
0,069431,3.062647,0.51113\C,0,-0.987229,2.19082,0.22866\C,0,-2.288147  
,2.325085,0.810449\C,0,-2.491111,3.361772,1.710771\H,0,-3.486355,3.516  
134,-2.139844\C,0,-1.432644,4.228362,2.110727\C,0,-0.124308,4.071169,1.  
523827\C,0,0.933326,4.903132,2.002336\H,0,1.94193,4.766814,1.601867\C,  
0,0.703664,5.865847,2.974435\H,0,1.533477,6.486941,3.329554\C,0,-0.595  
851,6.048306,3.518809\H,0,-0.765219,6.816877,4.280884\C,0,-1.639482,5.  
239594,3.097112\H,0,-2.641877,5.353921,3.525452\C,0,-3.396826,1.399765  
,0.40194\C,0,-3.829426,0.353548,1.264598\C,0,-4.019825,1.581873,-0.861  
244\C,0,-4.876005,-0.483974,0.838089\C,0,-5.06844,0.720453,-1.236725\C  
,0,-5.508951,-0.323054,-0.407355\H,0,-5.206752,-1.291104,1.500541\H,0,  
-5.551177,0.860569,-2.21171\C,0,3.934199,0.075608,-0.609036\C,0,4.0667  
37,-0.765296,-1.748403\C,0,4.385708,-0.371796,0.66125\C,0,4.661358,-2.  
030851,-1.592076\C,0,4.980983,-1.643248,0.762932\C,0,5.12595,-2.491444  
,-0.347255\H,0,4.76414,-2.677203,-2.471466\H,0,5.342316,-1.987001,1.74  
0004\C,0,4.261952,0.493988,1.916572\H,0,3.748037,1.428137,1.634172\C,0  
,3.596695,-0.327772,-3.137765\C,0,5.761417,-3.871489,-0.200166\H,0,6.0  
33239,-3.990468,0.865893\C,0,4.802876,0.005496,-4.040745\H,0,5.444785,  
0.781757,-3.587479\H,0,5.427714,-0.890785,-4.212417\H,0,4.462042,0.375  
007,-5.025603\C,0,7.05599,-3.991815,-1.0301\H,0,7.780342,-3.203439,-0.  
75757\H,0,7.537602,-4.973059,-0.863957\H,0,6.845478,-3.899986,-2.11168  
4\C,0,4.767129,-4.995059,-0.559432\H,0,4.468007,-4.937623,-1.622268\H,  
0,5.223055,-5.988251,-0.391784\H,0,3.850796,-4.929814,0.053311\C,0,3.4  
044,-0.189392,3.000841\H,0,2.409283,-0.451294,2.604905\H,0,3.887831,-1  
.110053,3.374104\H,0,3.265343,0.488442,3.863327\C,0,5.649569,0.890067,  
2.462295\H,0,5.545615,1.561626,3.33439\H,0,6.223325,0.002293,2.786925\  
H,0,6.243891,1.41705,1.694209\C,0,-6.65117,-1.239166,-0.840045\H,0,-6.  
861622,-1.012791,-1.902414\C,0,-3.206157,0.137465,2.645603\H,0,-2.2080  
25,0.606583,2.626411\C,0,-3.585304,2.693697,-1.818403\H,0,-2.768753,3.  
254276,-1.332685\C,0,-6.278446,-2.732477,-0.745946\H,0,-6.092528,-3.03  
7084,0.30025\H,0,-7.101377,-3.360074,-1.134111\H,0,-5.371325,-2.955001  
,-1.333782\C,0,-7.932266,-0.937792,-0.034201\H,0,-8.229677,0.120913,-0  
.138796\H,0,-8.772387,-1.56716,-0.381588\H,0,-7.777501,-1.141939,1.041  
602\C,0,-3.023956,2.124517,-3.136717\H,0,-2.634621,2.940279,-3.773441\  
H,0,-2.198417,1.420538,-2.937567\H,0,-3.806419,1.597134,-3.712728\C,0,  
-4.72824,3.695899,-2.07815\H,0,-5.094933,4.135389,-1.133053\H,0,-4.379  
212,4.52055,-2.726533\H,0,-5.584175,3.211168,-2.582987\C,0,-4.050993,0  
.823358,3.741402\H,0,-5.06143,0.376043,3.792683\H,0,-3.57482,0.702645,  
4.732156\H,0,-4.171827,1.903442,3.551841\C,0,-2.995601,-1.350342,2.985  
141\H,0,-2.422582,-1.444632,3.925803\H,0,-3.953027,-1.884568,3.12973\H  
,0,-2.419133,-1.845171,2.18948\C,0,2.669707,-1.364942,-3.801894\H,0,2.  
316598,-0.985053,-4.778719\H,0,3.189399,-2.322775,-3.989439\H,0,1.7909  
1,-1.549867,-3.162014\H,0,3.006888,0.596385,-3.013297\C,0,1.714114,-3.  
994284,3.29239\C,0,0.459589,-4.508249,3.689444\H,0,0.329566,-4.883895,  
4.710342\C,0,-0.619923,-4.543322,2.805653\H,0,-1.579695,-4.933607,3.15  
477\C,0,-0.487006,-4.043876,1.486402\C,0,0.773095,-3.528768,1.085396\H



,0.0.925784,-3.161369,0.065405\C,0,1.848407,-3.514136,1.971468\H,0,2.8  
10279,-3.118317,1.632115\C,0,-1.608116,-4.063051,0.545368\C,0,-2.73470  
5,-5.034879,0.695665\H,0,-3.018199,-5.09724,1.758772\H,0,-2.414735,-6.  
046964,0.38865\H,0,-3.614794,-4.738029,0.107184\N,0,-1.588418,-3.18096  
7,-0.439579\H,0,-0.916432,-2.392153,-0.334638\C,0,-2.39385,-3.108225,-  
1.611039\C,0,-2.725231,-4.266461,-2.341309\H,0,-2.373131,-5.247102,-2.  
011142\C,0,-3.473659,-4.145245,-3.518506\H,0,-3.727896,-5.045003,-4.08  
8321\C,0,-3.874539,-2.879726,-3.976092\C,0,-3.523811,-1.730454,-3.2504  
31\H,0,-3.833818,-0.741908,-3.599123\C,0,-2.785743,-1.834918,-2.066036  
\H,0,-2.534929,-0.941253,-1.48914\H,0,-4.452985,-2.788534,-4.901331\C,  
0,2.868934,-3.931179,4.258693\H,0,2.834331,-4.758753,4.987529\H,0,3.83  
7119,-3.955825,3.731606\H,0,2.827342,-2.985866,4.833379\Version=ES64L  
-G09RevD.01\State=1-AHF=-3216.0870195\RMSD=4.730e-09\Dipole=-1.791023  
9,-4.4433182,0.9519908\Quadrupole=-9.1511528,22.5402497,-13.3890968,16  
.0129477,11.0477293,-8.3206864\PG=C01 [X(C65H72N1O4P1)]\@

### Conf3

1\1\GINC-WORKER0\SP\RTSPSTPSS\def2SVP\C65H72N1O4P1\JHIOE\29-Apr-2019\0

\#p tpsstps/def2svp int=ultrafine empiricaldispersion=gd3 scrf=(smd,  
solvent=ch2cl2,read,externaliteration,dovacuum)\title\0,1P,0,0.0226  
98,-0.175332,-0.184181\O,0,1.414735,0.560129,0.410699\O,0,-0.820413,1.  
21519,-0.638\O,0,-0.624708,-0.844138,1.006991\O,0,0.257783,-0.957818,-  
1.456772\C,0,1.385562,2.87523,-0.217747\C,0,1.997437,1.617185,-0.25297  
1\C,0,3.262497,1.382103,-0.878053\C,0,3.89088,2.451192,-1.501437\H,0,4.  
871139,2.303636,-1.966944\C,0,3.279304,3.735881,-1.580342\C,0,1.99811  
9,3.954072,-0.952957\C,0,1.376641,5.229402,-1.116833\H,0,0.384747,5.39  
7377,-0.687431\C,0,2.003477,6.247501,-1.820311\H,0,1.502302,7.214859,-  
1.936564\C,0,3.284929,6.043727,-2.398994\H,0,3.772701,6.857941,-2.9460  
39\C,0,3.904195,4.809053,-2.284793\H,0,4.882379,4.631171,-2.746342\C,0  
,0.128831,3.052571,0.564631\C,0,-0.954966,2.203243,0.318247\C,0,-2.222  
348,2.34322,0.968568\C,0,-2.368385,3.37376,1.886933\H,0,-3.338664,3.53  
4755,2.367619\C,0,-1.280478,4.222456,2.243708\C,0,-0.002078,4.050364,1.  
597916\C,0,1.089007,4.860439,2.037437\H,0,2.076709,4.711781,1.591893\  
C,0,0.917359,5.818902,3.025522\H,0,1.771796,6.423787,3.348685\C,0,-0.3  
54205,6.017998,3.627006\H,0,-0.478075,6.783429,4.400862\C,0,-1.428008,  
5.22922,3.245268\H,0,-2.408593,5.355821,3.71831\C,0,-3.356291,1.423962  
,0.621108\C,0,-3.755861,0.392987,1.518323\C,0,-4.041019,1.595248,-0.60  
902\C,0,-4.840773,-0.424593,1.160731\C,0,-5.118109,0.741475,-0.92445\C  
,0,-5.538746,-0.276251,-0.053492\H,0,-5.160246,-1.210433,1.855016\H,0,  
-5.634674,0.889132,-1.878035\C,0,3.872257,0.014357,-0.830574\C,0,3.935  
891,-0.780865,-2.005957\C,0,4.384181,-0.488826,0.397494\C,0,4.534807,-  
2.053939,-1.931494\C,0,4.966817,-1.768214,0.420356\C,0,5.057545,-2.568  
05,-0.733937\H,0,4.593146,-2.669014,-2.837826\H,0,5.367708,-2.148658,1.  
367376\C,0,4.352481,0.337978,1.684681\H,0,3.832692,1.28589,1.466463\C  
,0,3.384076,-0.29134,-3.347017\C,0,5.70709,-3.948943,-0.693092\H,0,5.6  
6489,-4.355884,-1.720958\C,0,4.529489,0.073515,-4.314423\H,0,5.203247,  
0.83126,-3.876298\H,0,5.138233,-0.816412,-4.560869\H,0,4.125415,0.4805  
31,-5.259799\C,0,4.933916,-4.917921,0.224457\H,0,3.876801,-5.001589,-0.  
083009\H,0,5.382339,-5.92782,0.19062\H,0,4.957248,-4.575659,1.275309\  
C,0,7.191931,-3.864508,-0.283685\H,0,7.30056,-3.482589,0.748302\H,0,7.  
665738,-4.862549,-0.324549\H,0,7.753943,-3.190911,-0.955254\C,0,3.5625  
51,-0.367966,2.804204\H,0,2.534858,-0.593714,2.475306\H,0,4.050325,-1.  
311918,3.106326\H,0,3.504125,0.277931,3.699732\C,0,5.780053,0.701139,2  
.144904\H,0,5.746437,1.349391,3.039993\H,0,6.361233,-0.203123,2.404771  
\H,0,6.329013,1.240735,1.352188\C,0,-6.696879,-1.228492,-0.365683\H,0,  
-7.352776,-1.222909,0.527859\C,0,-3.057877,0.176328,2.863261\H,0,-2.06  
2315,0.645083,2.787547\C,0,-3.655881,2.706413,-1.5881\H,0,-2.800953,3.  
252256,-1.154513\C,0,-7.550414,-0.804829,-1.570514\H,0,-6.972458,-0.84  
8136,-2.511993\H,0,-8.414159,-1.484254,-1.682112\H,0,-7.9404,0.222417,-  
1.456354\C,0,-6.19186,-2.679196,-0.542439\H,0,-5.612367,-3.01459,0.335  
216\H,0,-7.043364,-3.372161,-0.672438\H,0,-5.542803,-2.76324,-1.431493  
\C,0,-3.195523,2.148366,-2.948748\H,0,-2.839631,2.968267,-3.599457\H,0  
,-2.368508,1.43032,-2.817944\H,0,-4.024321,1.642149,-3.476789\C,0,-4.8  
01259,3.725296,-1.757083\H,0,-5.097567,4.156079,-0.783674\H,0,-4.48831  
3,4.5549,-2.417575\H,0,-5.695347,3.255764,-2.2075\C,0,-3.837346,0.8629  
86,4.005886\H,0,-4.842902,0.41549,4.117454\H,0,-3.303744,0.743866,4.96  
7104\H,0,-3.969523,1.942804,3.821961\C,0,-2.828442,-1.312272,3.187805\  
H,0,-2.212493,-1.407995,4.100999\H,0,-3.776936,-1.849073,3.375785\H,0,  
-2.288774,-1.803359,2.364115\C,0,2.412359,-1.302051,-3.987536\H,0,1.99  
6332,-0.884627,-4.923432\H,0,2.916327,-2.251664,-4.246167\H,0,1.576813  
,-1.511465,-3.299229\H,0,2.806208,0.627495,-3.150008\C,0,1.657311,-4.0  
19332,3.230933\C,0,0.403281,-4.52914,3.634918\H,0,0.278225,-4.906442,4  
.655821\C,0,-0.682356,-4.556741,2.758265\H,0,-1.641896,-4.942817,3.112  
657\C,0,-0.556275,-4.051905,1.440468\C,0,0.704088,-3.543906,1.031763\H  
,0,0.850396,-3.17452,0.01168\C,0,1.78564,-3.538669,1.909756\H,0,2.7476  
45,-3.150587,1.563762\C,0,-1.68594,-4.055099,0.509686\C,0,-2.809261,-5  
.031415,0.654472\H,0,-3.098234,-5.092764,1.716474\H,0,-2.481938,-6.042

454,0.352023\H,0,-3.687362,-4.740816,0.060796\N,0,-1.674842,-3.156892,  
-0.460701\H,0,-0.99934,-2.371548,-0.349809\C,0,-2.491374,-3.064009,-1.  
623627\C,0,-2.829072,-4.208652,-2.371927\H,0,-2.472392,-5.195044,-2.06  
4227\C,0,-3.590175,-4.066364,-3.538836\H,0,-3.84923,-4.955711,-4.12266  
2\C,0,-3.997922,-2.793293,-3.968148\C,0,-3.64055,-1.65731,-3.224696\H,  
0,-3.957469,-0.66345,-3.551094\C,0,-2.888572,-1.783083,-2.051299\H,0,-  
2.632593,-0.900527,-1.460074\H,0,-4.587432,-2.685425,-4.884529\C,0,2.8  
18392,-3.959398,4.189892\H,0,2.769065,-4.767088,4.939662\H,0,3.782777,  
-4.020001,3.658454\H,0,2.80362,-2.998071,4.738813\Version=ES64L-G09Re  
vD.01\State=1-A\HF=-3216.0861985\RMSD=4.937e-09\Dipole=-1.8123446,-4.4  
787249,0.9611602\Quadrupole=-7.8820823,22.2282103,-14.3461281,16.69278  
15,10.0588739,-7.6403088\PG=C01 [X(C65H72N1O4P1)]\@

## TRIP/2E Type I

### Conf0

1\1\GINC-WORKER0\SP\RTSPSTPSS\def2SVP\C65H69F3N1O4P1\JHIOE\07-May-2019

\0\#p tpsstps/def2svp int=ultrafine empiricaldispersion=gd3 scrf=(sm  
d,solvent=ch2cl2,read.externaliteration,dovacuum)\title\0,1P,0,0.19  
0648,-0.599056,-1.387063\O,0,-1.128743,0.348037,-1.786618\O,0,0.968308  
,0.458384,-0.312399\O,0,0.959487,-0.804237,-2.658069\O,0,-0.219947,-1.  
741798,-0.460601\C,0,-1.235505,2.217502,-0.291974\C,0,-1.819331,1.0688  
67,-0.834822\C,0,-3.151846,0.646063,-0.528005\C,0,-3.877778,1.401982,0.  
38302\H,0,-4.907586,1.115694,0.621441\C,0,-3.308486,2.526644,1.046955  
\C,0,-1.959628,2.931552,0.732511\C,0,-1.382377,3.995808,1.489673\H,0,-  
0.345155,4.285256,1.298847\C,0,-2.108892,4.651208,2.473021\H,0,-1.6386  
51,5.456918,3.047496\C,0,-3.4525,4.281289,2.747339\H,0,-4.015859,4.808  
435,3.524856\C,0,-4.035446,3.236125,2.049659\H,0,-5.058803,2.917101,2.  
275834\C,0,0.115085,2.657764,-0.746825\C,0,1.191735,1.766732,-0.692677  
\C,0,2.546155,2.162107,-0.922713\C,0,2.783625,3.473773,-1.308423\H,0,3  
.812509,3.811606,-1.469607\C,0,1.718568,4.399649,-1.507265\C,0,0.36162  
3,3.993339,-1.233828\C,0,-0.686074,4.930548,-1.484625\H,0,-1.723903,4.  
626345,-1.320906\C,0,-0.408344,6.208754,-1.946547\H,0,-1.2308,6.906701  
,-2.138303\C,0,0.931772,6.618026,-2.180498\H,0,1.138282,7.632498,-2.53  
8703\C,0,1.971389,5.725923,-1.970578\H,0,3.008575,6.0221,-2.165085\C,0  
,-1.840767,-0.32622,4.222974\C,0,-1.411562,-1.484586,4.888998\H,0,-1.9  
03548,-1.804252,5.811275\C,0,-0.349623,-2.230366,4.366465\H,0,-0.02470  
7,-3.135077,4.887599\C,0,0.264,-1.842085,3.154865\C,0,-0.168735,-0.665  
363,2.502005\H,0,0.321572,-0.321303,1.588773\C,0,-1.211234,0.090163,3.  
037115\H,0,-1.535486,1.00229,2.529181\C,0,1.361662,-2.659383,2.593705\  
C,0,2.321206,-3.336595,3.522438\H,0,3.295159,-3.50816,3.038505\H,0,1.9  
16938,-4.316567,3.836945\H,0,2.454501,-2.72451,4.427382\N,0,1.469968,-  
2.736667,1.289386\H,0,0.742524,-2.238373,0.65165\C,0,2.427017,-3.47187  
7,0.520809\C,0,3.003219,-2.823454,-0.587703\H,0,2.779532,-1.773753,-0.  
794647\C,0,3.890291,-3.529497,-1.408809\H,0,4.34505,-3.019928,-2.26317  
\C,0,4.199673,-4.870454,-1.132929\C,0,3.612944,-5.512044,-0.030378\H,0  
,3.838747,-6.562245,0.181649\C,0,2.718924,-4.820902,0.79776\H,0,2.2266  
87,-5.333471,1.628055\C,0,3.659037,1.189295,-0.670731\C,0,4.352209,0.5  
83344,-1.749856\C,0,4.012893,0.877035,0.673051\C,0,5.405428,-0.307483,  
-1.461655\C,0,5.063731,-0.025715,0.906091\C,0,5.773365,-0.632236,-0.14  
6852\H,0,5.947451,-0.779771,-2.289265\H,0,5.338491,-0.264013,1.938324\  
C,0,-3.729094,-0.562236,-1.200017\C,0,-4.029362,-1.729752,-0.446566\C,  
0,-3.981801,-0.540356,-2.601831\C,0,-4.585964,-2.841793,-1.109176\C,0,-  
4.534579,-1.677918,-3.213602\C,0,-4.845256,-2.841957,-2.487905\H,0,-4.  
817012,-3.744788,-0.530598\H,0,-4.733014,-1.652777,-4.291564\H,0,4.89  
4103,-5.417168,-1.779403\C,0,-2.996181,0.489098,4.74941\C,0,-3.7145,0.  
697306,-3.462025\H,0,-3.25376,1.467185,-2.821047\C,0,-3.749299,-1.8373  
85,1.05382\C,0,-5.438411,-4.068184,-3.17656\H,0,-5.586646,-4.838385,-2.  
.396343\C,0,-5.058437,-1.92374,1.864656\H,0,-4.844969,-1.978576,2.9470  
28\H,0,-5.69833,-1.040966,1.688183\H,0,-5.638966,-2.82354,1.588486\C,0  
,-4.470569,-4.64781,-4.228872\H,0,-4.288688,-3.924682,-5.045211\H,0,-3.  
49452,-4.900695,-3.77744\H,0,-4.888957,-5.566424,-4.68001\C,0,-6.815  
776,-3.761287,-3.799602\H,0,-7.253645,-4.673354,-4.245347\H,0,-7.52154  
2,-3.377969,-3.040877\H,0,-6.733175,-3.00231,-4.599533\C,0,-2.725395,0.  
402374,-4.608182\H,0,-3.14347,-0.327662,-5.325828\H,0,-2.501505,1.328  
896,-5.168535\H,0,-1.776451,0.001859,-4.214463\C,0,-5.03397,1.291492,-  
3.998987\H,0,-4.837824,2.218726,-4.688504\H,0,-5.548725,0.583509,-4.67  
4495\H,0,-5.726085,1.537107,-3.173236\C,0,6.919963,-1.603488,0.122168\  
H,0,7.123984,-2.130401,-0.829283\C,0,3.987681,0.885684,-3.204212\H,0,2.  
990965,1.359376,-3.196844\C,0,3.299496,1.549604,1.849073\H,0,2.255573  
,1.733762,1.540852\C,0,8.201439,-0.8381,0.516324\H,0,9.045477,-1.53594  
2,0.668679\H,0,8.490434,-0.114725,-0.26684\H,0,8.049393,-0.276974,1.45  
7175\C,0,6.565618,-2.669149,1.177847\H,0,6.425515,-2.220902,2.17847\H,  
0,5.638119,-3.204747,0.909755\H,0,7.379221,-3.412605,1.259663\C,0,3.24  
6036,0.681159,3.117744\H,0,2.876225,-0.333317,2.893408\H,0,4.237567,0.  
583409,3.596178\H,0,2.565893,1.135842,3.859646\C,0,3.935759,2.923263,2

.155403\H,0,3.917824,3.580376,1.268542\H,0,3.389145,3.433154,2.970107\H,0,4.988897,2.803109,2.470059\C,0,4.989169,1.886242,-3.819271\H,0,5.032813,2.82437,-3.238802\H,0,6.008305,1.456959,-3.843238\H,0,4.701643,2.138688,-4.856671\C,0,3.873197,-0.383639,-4.070038\H,0,3.531704,-0.112802,-5.086175\H,0,4.843729,-0.901641,-4.178079\H,0,3.133442,-1.076725,-3.638535\C,0,-2.81164,-3.018736,1.377231\H,0,-3.286722,-3.991075,1.150501\H,0,-1.879085,-2.937932,0.79484\H,0,-2.554352,-3.015583,2.452041\H,0,-3.226223,-0.91917,1.365743\F,0,-2.647595,1.786384,4.953087\F,0,-4.035356,0.505682,3.866125\F,0,-3.484097,0.017696,5.92033\Version=ES64 L-G09RevD.01\State=1-AltHF=-3513.6183668\IRMSD=2.003e-09\Dipole=2.580562 6,-2.8086783,4.6444803\Quadrupole=-7.9075191,17.3759406,-9.4684214,-16.2257663,8.8167536,-23.2629552\PG=C01 [X(C65H69F3N1O4P1)]\@

### Conf1

1\1\GINC-WORKER1\SP\RTSPSTPSS\def2SVP\C65H69F3N1O4P1\JHIOE\07-May-2019

l0\#p tpsstps/def2svp int=ultrafine empiricaldispersion=gd3 scrf=(sm d,solvent=ch2cl2,read,externaliteration,dovacuum)\title\0,1\p,0,0.20 0875,-0.478127,-1.498589\O,0,-1.097342,0.512456,-1.861386\O,0,0.970199,0.495047,-0.340572\O,0,0.995901,-0.61238,-2.763399\O,0,-0.245701,-1.673391,-0.658898\C,0,-1.18756,2.298214,-0.268917\C,0,-1.785186,1.189899,-0.875556\C,0,-3.123704,0.768258,-0.593491\C,0,-3.840443,1.481657,0.35866\H,0,-4.87257,1.193495,0.584258\C,0,-3.258698,2.562865,1.081292\C,0,-1.904971,2.967818,0.789167\C,0,-1.314567,3.983284,1.60116\H,0,-0.273785,4.269614,1.425038\C,0,-2.032821,4.593562,2.618932\H,0,-1.553443,5.362087,3.235233\C,0,-3.380332,4.224512,2.87466\H,0,-3.937023,4.715295,3.680244\C,0,-3.976276,3.225593,2.122356\H,0,-5.003307,2.907269,2.332214\C,0,0.178679,2.73197,-0.679857\C,0,1.23408,1.8163,-0.640458\C,0,2.6038,2.19196,-0.803646\C,0,2.879591,3.512749,-1.126971\H,0,3.919351,3.836141,-1.240988\C,0,1.838866,4.468232,-1.319241\C,0,0.466386,4.081804,-1.097963\C,0,-0.554742,5.052041,-1.331083\H,0,-1.602281,4.763357,-1.204111\C,0,-0.238509,6.341478,-1.73329\H,0,-1.040563,7.065612,-1.91399\C,0,1.115485,6.728845,-1.920248\H,0,1.35254,7.751828,-2.232273\C,0,2.130624,5.806131,-1.722216\H,0,3.178351,6.087305,-1.879013\C,0,-1.854646,-0.475044,4.129338\C,0,-1.433846,-1.670158,4.733017\H,0,-1.921972,-2.02939,5.642599\C,0,-0.385379,-2.401096,4.164335\H,0,-0.065093,-3.333061,4.637908\C,0,0.220679,-1.961984,2.966241\C,0,-0.204243,-0.75043,2.375517\H,0,0.281395,-0.368611,1.475103\C,0,-1.23043,-0.008632,2.959284\H,0,-1.546536,0.931794,2.500323\C,0,1.302314,-2.768354,2.358973\C,0,2.262913,-3.494661,3.2496\H,0,3.231634,-3.650095,2.749523\H,0,1.855171,-4.485127,3.523519\H,0,2.408149,-2.925043,4.180033\N,0,1.396878,-2.798536,1.051876\H,0,0.68173,-2.255608,0.435964\C,0,2.335528,-3.526719,0.254158\C,0,2.932618,-2.853057,-0.827604\H,0,2.734265,-1.792258,-0.999415\C,0,3.808592,-3.550261,-1.668289\H,0,4.280286,-3.021967,-2.501798\C,0,4.08446,-4.907183,-1.439404\C,0,3.47409,-5.574561,-0.365335\H,0,3.673115,-6.636948,-0.190578\C,0,2.592053,-4.892033,0.482079\H,0,2.084234,-5.421075,1.292372\C,0,3.677126,1.178141,-0.541044\C,0,4.395511,0.582495,-1.60878\C,0,3.954318,0.804129,0.805926\C,0,5.38773,-0.372519,-1.307433\C,0,4.944978,-0.160564,1.051051\C,0,5.669797,-0.768155,0.00879\H,0,5.943929,-0.841264,-2.127337\H,0,5.159782,-0.449526,2.084509\C,0,-3.712934,-0.396096,-1.329875\C,0,-4.021046,-1.603069,-0.641149\C,0,-3.963894,-0.295761,-2.726614\C,0,-4.581217,-2.67338,-1.361811\C,0,-4.52359,-1.397527,-3.399943\C,0,-4.838612,-2.596883,-2.741231\H,0,-4.814493,-3.600796,-0.826029\H,0,-4.724026,-1.319488,-4.475684\H,0,4.770459,-5.446367,-2.101029\C,0,-2.996585,0.326635,4.704352\C,0,-3.687326,0.986128,-3.515415\H,0,-3.217978,1.712849,-2.831449\C,0,-3.751628,-1.791627,0.85338\C,0,-5.426006,-3.781098,-3.504217\H,0,-5.554897,-3.458339,-4.554611\C,0,-5.068406,-1.881847,1.651256\H,0,-4.863912,-1.984342,2.731858\H,0,-5.68708,-0.978615,1.505494\H,0,-5.666533,-2.756595,1.334575\C,0,-6.813633,-4.181439,-2.963568\H,0,-6.748736,-4.536727,-1.918532\H,0,-7.514692,-3.32789,-2.989164\H,0,-7.246189,-4.998617,-3.569498\C,0,-4.461378,-4.985638,-3.499897\H,0,-4.871203,-5.815648,-4.104477\H,0,-3.476335,-4.710393,-3.91711\H,0,-4.300932,-5.363294,-2.473053\C,0,-2.702368,0.752166,-4.679038\H,0,-3.12654,0.070756,-5.43941\H,0,-2.471641,1.709514,-5.181764\H,0,-1.756114,0.321113,-4.311801\C,0,-5.003231,1.622153,-4.011796\H,0,-4.80084,2.577756,-4.530009\H,0,-5.528873,0.95805,-4.722511\H,0,-5.688327,1.828242,-3.169577\C,0,6.738523,-1.818924,0.298118\H,0,6.995168,-2.291614,-0.668758\C,0,4.119501,0.962683,-3.064479\H,0,3.13959,1.469768,-3.08672\C,0,3.227662,1.478181,1.973222\H,0,2.198678,1.700782,1.63969\C,0,8.019502,-1.160714,0.853573\H,0,8.811091,-1.915358,1.016186\H,0,8.4103,-0.397745,0.156779\H,0,7.818667,-0.664428,1.821308\C,0,6.233466,-2.929215,1.241344\H,0,6.016294,-2.535015,2.250892\H,0,5.313501,-3.397323,0.850277\H,0,6.998843,-3.718762,1.35195\C,0,3.114002,0.595803,3.228194\H,0,2.721159,-0.404985,2.983961\H,0,4.089184,0.464842,3.731898\H,0,2.427137,1.062025,3.956608\C,0,3.898165,2.826202,2.321067\H,0,3.926636,3.499374,1.446843\H,0,3.345556,3.338899,3.129944\H,0,4.937598,2.666139,2.662268\C,0,5.183624,1.955666,-3.578892\H,0,5.228303,2.863971,-2.952747\H,0,6.188315,1.493042,-3.573123\H,0,4.957409,2.26578

4,-4.615768\C,0,4.010091,-0.259601,-3.995371\H,0,3.732366,0.069049,-5.013843\H,0,4.96732,-0.806559,-4.078072\H,0,3.225816,-0.945552,-3.637221\C,0,-2.848787,-3.0126,1.124501\H,0,-3.345342,-3.959161,0.841396\H,0,-1.907168,-2.926823,0.557512\H,0,-2.605256,-3.074171,2.200685\H,0,-3.207155,-0.903912,1.213586\F,0,-2.628395,1.60436,4.984289\F,0,-3.493028,-0.205476,5.845489\F,0,-4.034666,0.412252,3.823795\Version=ES64L-G09R evD.01\State=1-A\HF=-3513.6185302\RMDS=1.979e-09\Dipole=2.4812717,-3.1217463,4.4842739\Quadrupole=-8.3960565,20.8546422,-12.4585856,-15.9093918,7.5129681,-20.8432461\PG=C01 [X(C65H69F3N1O4P1)]\@\

## Conf2

1\1\GINC-WORKER2\SP\IRTPSS\def2SVP\C65H69F3N1O4P1\JHIOE\07-May-2019

\0\#p tpsstps/def2svp int=ultrafine empiricaldispersion=gd3 scrf=(sm d,solvent=ch2cl2,read,externaliteration,dovacuum)\title\0,1\P,0,0.24 8848,-0.6155,-1.398916\O,0,-0.979716,0.398412,-1.907559\O,0,0.999978,0.402265,-0.26567\O,0,1.104995,-0.875547,-2.602143\O,0,-0.305698,-1.719652,-0.501274\C,0,-1.108829,2.273267,-0.426609\C,0,-1.706501,1.152367,-1.009425\C,0,-3.075015,0.792397,-0.795595\C,0,-3.827242,1.589129,0.057572\H,0,-4.882976,1.350768,0.224584\C,0,-3.25543,2.691786,0.754941\C,0,-1.869898,3.031296,0.537186\C,0,-1.30077,4.076854,1.326119\H,0,0.240739,4.319125,1.208238\C,0,-2.065499,4.773318,2.250593\H,0,-1.601898,5.563441,2.851506\C,0,-3.440275,4.465482,2.431368\H,0,-4.032738,5.023533,3.164389\C,0,-4.018901,3.441344,1.699693\H,0,-5.068988,3.170008,1.854153\C,0,0.294111,2.638156,-0.776978\C,0,1.318084,1.696395,-0.627258\C,0,2.703353,2.028231,-0.740742\C,0,3.032524,3.322775,-1.120036\H,0,4.086313,3.610948,-1.193654\C,0,2.033524,4.291262,-1.42588\C,0,0.641439,3.951827,-1.26008\C,0,-0.338077,4.928383,-1.614387\H,0,-1.398773,4.674296,-1.53053\C,0,0.035532,6.181512,-2.077383\H,0,-0.735152,6.910297,-2.351776\C,0,1.408027,6.525367,-2.206617\H,0,1.689964,7.520847,-2.566607\C,0,2.384767,5.594463,-1.890517\H,0,3.447038,5.840607,-2.00098\C,0,-2.169444,-0.153943,4.113601\C,0,-1.849614,-1.32973,4.810084\H,0,-2.411916,-1.610114,5.704465\C,0,-0.806938,-2.142893,4.353564\H,0,-0.568987,-3.06172,4.896682\C,0,-0.102929,-1.80344,3.176944\C,0,-0.425747,-0.608513,2.493256\H,0,0.134591,-0.303409,1.606473\C,0,-1.449254,0.213336,2.963483\H,0,-1.688118,1.13909,2.432858\C,0,0.969944,-2.693104,2.682642\C,0,1.810169,-3.452907,3.660895\H,0,2.786416,-3.720564,3.228535\H,0,1.296972,-4.387556,3.953602\H,0,1.953831,-2.852599,4.572306\H,0,1.166964,-2.762127,1.389375\H,0,0.518714,-2.222582,0.699369\C,0,2.125687,-3.553082,0.679704\C,0,2.867468,-2.916209,-0.332845\H,0,2.771181,-1.839402,-0.495931\C,0,3.748358,-3.674368,-1.112456\H,0,4.331117,-3.178094,-1.893445\C,0,3.88748,-5.053557,-0.889771\C,0,3.139558,-5.680366,0.119151\H,0,3.234965,-6.757897,0.288984\C,0,2.249445,-4.936183,0.905379\H,0,1.63284,-5.427553,1.662815\C,0,3.765467,1.032944,-0.377182\C,0,4.564284,0.424773,-1.381264\C,0,4.007002,0.748641,0.995947\C,0,5.630305,-0.409229,-0.990961\C,0,5.083037,-0.091916,1.332939\C,0,5.921845,-0.663775,0.360139\H,0,6.255375,-0.863993,-1.767802\H,0,5.293241,-0.297839,2.388413\C,0,-3.659712,-0.401406,-1.485848\C,0,-4.066686,-1.537694,-0.730557\C,0,-3.8144,-0.400707,-2.899651\C,0,-4.630077,-2.635983,-1.405078\C,0,-4.377112,-1.528735,-3.52542\C,0,-4.792863,-2.657328,-2.800713\H,0,-4.942846,-3.507929,-0.818744\H,0,-4.502544,-1.52682,-4.615222\H,0,4.577874,-5.640133,-1.50485\C,0,-3.307545,0.729424,4.562902\C,0,-3.433928,0.805695,-3.76088\H,0,-2.97439,1.561941,-3.103102\C,0,-3.893868,-1.624933,0.787291\C,0,-5.401504,-3.865277,-3.507708\H,0,-5.397743,-3.641903,-4.591193\C,0,-5.256188,-1.617021,1.509855\H,0,-5.116914,-1.660611,2.604648\H,0,-5.829904,-0.702637,1.275747\H,0,-5.869913,-2.48735,1.211699\C,0,-6.866906,-4.092791,-3.081474\H,0,-6.935754,-4.334549,-2.004674\H,0,-7.481808,-3.193972,-3.267206\H,0,-7.311192,-4.934186,-3.64454\C,0,-4.557315,-5.13787,-3.288351\H,0,-4.976098,-5.986334,-3.860117\H,0,-3.512883,-4.985899,-3.614097\H,0,-4.540827,-5.426935,-2.221281\C,0,-2.393184,0.443342,-4.839381\H,0,-2.803877,-0.271953,-5.575759\H,0,-2.082852,1.349223,-5.392287\H,0,-1.494764,-0.003116,-4.381565\C,0,-4.687711,1.456049,-4.38328\H,0,-4.411961,2.361246,-4.95521\H,0,-5.199917,0.762556,-5.075541\H,0,-5.410897,1.752604,-3.602242\C,0,7.109854,-1.528895,0.776893\H,0,7.182684,-1.461566,1.878883\C,0,4.305041,0.678184,-2.86776\H,0,3.319659,1.168476,-2.948203\C,0,3.163294,1.396587,2.097355\H,0,2.154281,1.564839,1.683746\C,0,6.895238,-3.01307,0.417973\H,0,7.747525,-3.624657,0.767489\H,0,5.975894,-3.407468,0.884225\H,0,6.807543,-3.149877,-0.675099\C,0,8.434137,-1.002244,0.188969\H,0,8.441177,-1.074068,-0.914159\H,0,8.60005,0.055655,0.461031\H,0,9.289193,-1.591758,0.567436\C,0,2.994728,0.510022,3.344079\H,0,2.666748,-0.50725,3.071494\H,0,3.933673,0.421141,3.920129\H,0,2.234758,0.944575,4.017576\C,0,3.735356,2.77798,2.484207\H,0,3.790411,3.448525,1.609064\H,0,3.098236,3.262203,3.246995\H,0,4.754408,2.675193,2.900902\C,0,5.364675,1.634076,-3.455026\H,0,5.390304,2.593137,-2.908529\H,0,6.374428,1.186341,-3.397803\H,0,5.148166,1.850939,-4.517348\C,0,4.220822,-0.625855,-3.684132\H,0,3.978858,-0.393235,-4.737593\H,0,5.177651,-1.179557,-3.680524\H,0,3.421334,-1.273975,-3.290858\C,0,-3.052607,-2.851372,1.195702\H,0,-3.571846,-3.79909

2,0.961327\H,0,-2.08375,-2.842064,0.670144\H,0,-2.862149,-2.83585,2.28  
4116\H,0,-3.339262,-0.731706,1.117092\F,0,-3.872152,0.312726,5.71991\F  
,0,-4.30122,0.770054,3.629369\F,0,-2.907349,2.013807,4.751115\Version  
=ES64L-G09RevD.01\State=1-A\HF=-3513.6167474\IRMSD=1.969e-09\Dipole=1.9  
921558,-2.8442456,4.8715654\Quadrupole=-9.8969745,17.7955698,-7.898595  
3,-11.2991198,7.173432,-24.6882764\PG=C01 [X(C65H69F3N1O4P1)]\@\

### Conf3

1\1\GINC-LOGIN\SPRT\PSSTPSS\def2SVP\C65H69F3N1O4P1\JHIOE\07-May-2019\0  
\#p tpsstpss/def2svp int=ultrafine empiricaldispersion=gd3 scrf=(smd,  
solvent=ch2cl2,read,externaliteration,dovacuum)\title\0,1\P,0,0.2416  
6,-0.738169,-1.28005\O,0,-1.016607,0.223816,-1.816845\O,0,1.012822,0.3  
57843,-0.237022\O,0,1.06476,-1.066331,-2.489337\O,0,-0.271828,-1.79001  
5,-0.298764\C,0,-1.144366,2.178335,-0.441213\C,0,-1.737875,1.021229,-0  
.953116\C,0,-3.103587,0.668386,-0.710872\C,0,-3.853961,1.506031,0.1039  
37\H,0,-4.908292,1.273857,0.287463\C,0,-3.282386,2.64664,0.737823\C,  
-1.900509,2.980031,0.49075\C,0,-1.328512,4.066552,1.219881\H,0,-0.2701  
32,4.305017,1.080939\C,0,-2.088273,4.807195,2.113544\H,0,-1.622683,5.6  
28337,2.669644\C,0,-3.460728,4.505204,2.32018\H,0,-4.049834,5.099196,3  
.027241\C,0,-4.041524,3.442556,1.647423\H,0,-5.089409,3.176744,1.82432  
1\C,0,0.242558,2.549433,-0.843087\C,0,1.290614,1.6368,-0.678356\C,0,2.  
663609,1.991897,-0.853644\C,0,2.952694,3.277711,-1.291425\H,0,3.997355  
,3.584706,-1.406508\C,0,1.924948,4.211028,-1.609575\C,0,0.546313,3.846  
27,-1.396981\C,0,-0.464605,4.780868,-1.775951\H,0,-1.516762,4.504411,-  
1.661552\C,0,-0.131967,6.021375,-2.300063\H,0,-0.926264,6.71728,-2.591  
894\C,0,1.228557,6.394026,-2.469873\H,0,1.477887,7.379886,-2.877331\C,  
0,2.234562,5.501833,-2.134588\H,0,3.287882,5.768204,-2.278575\C,0,-2.2  
09259,-0.038367,4.183184\C,0,-1.862898,-1.167958,4.940417\H,0,-2.43151  
2,-1.426038,5.837513\C,0,-0.785417,-1.96518,4.540201\H,0,-0.526375,-2.  
848623,5.130286\C,0,-0.072377,-1.657631,3.36041\C,0,-0.423347,-0.50925  
2,2.613696\H,0,0.139591,-0.231239,1.719441\C,0,-1.481545,0.298315,3.02  
8443\H,0,-1.743057,1.188243,2.449832\C,0,1.036413,-2.533648,2.925129\C  
0,1.895182,-3.204966,3.950623\H,0,2.882725,-3.465274,3.540212\H,0,1.4  
09203,-4.137048,4.294214\H,0,2.011309,-2.546965,4.825457\N,0,1.24339,-  
2.668649,1.638871\H,0,0.576537,-2.193567,0.919137\C,0,2.232276,-3.4624  
21,0.976155\C,0,2.947568,-2.85781,-0.07484\H,0,2.80911,-1.7968,-0.3001  
8\C,0,3.855694,-3.625873,-0.812226\H,0,4.415654,-3.154505,-1.624646\C,  
0,4.049619,-4.982883,-0.508245\C,0,3.328463,-5.577558,0.538846\H,0,3.4  
66584,-6.638529,0.771829\C,0,2.410418,-4.823813,1.282807\H,0,1.814596,  
-5.294328,2.069545\C,0,3.768876,1.040709,-0.499623\C,0,4.530168,0.4081  
71,-1.51812\C,0,4.099866,0.837777,0.868118\C,0,5.65483,-0.355383,-1.15  
0667\C,0,5.233004,0.065579,1.183057\C,0,6.040214,-0.518464,0.19143\H,0  
,6.252219,-0.827816,-1.938824\H,0,5.512632,-0.07421,2.233492\C,0,-3.69  
3176,-0.55245,-1.34817\C,0,-4.09868,-1.656352,-0.549469\C,0,-3.860104,  
-0.602548,-2.762035\C,0,-4.673764,-2.776697,-1.181521\C,0,-4.43362,-1.  
746546,-3.342218\C,0,-4.852562,-2.846025,-2.571417\H,0,-4.987947,-3.63  
0182,-0.56794\H,0,-4.566258,-1.775448,-4.430152\H,0,4.761927,-5.577226  
,-1.089955\C,0,-3.37998,0.830048,4.574186\C,0,-3.482485,0.570271,-3.66  
9909\H,0,-3.018831,1.350703,-3.044239\C,0,-3.912421,-1.68865,0.968738\  
C,0,-5.475252,-4.078883,-3.220764\H,0,-5.748261,-4.770793,-2.401732\C,  
0,-5.267802,-1.685436,1.704272\H,0,-5.117338,-1.68941,2.798488\H,0,-5.  
862972,-0.791687,1.445409\H,0,-5.865974,-2.577907,1.442465\C,0,-4.4660  
96,-4.806443,-4.1333\H,0,-4.162333,-4.165031,-4.981126\H,0,-3.554311,-  
5.087428,-3.576699\H,0,-4.911812,-5.72828,-4.55049\C,0,-6.766643,-3.73  
1412,-3.989471\H,0,-7.237197,-4.646918,-4.392913\H,0,-7.5004,-3.229699  
,-3.333405\H,0,-6.556493,-3.058811,-4.841412\C,0,-2.447878,0.166097,-4  
.73924\H,0,-2.862276,-0.577963,-5.444534\H,0,-2.141683,1.049948,-5.328  
962\H,0,-1.546587,-0.261603,-4.269369\C,0,-4.738967,1.198386,-4.309056  
\H,0,-4.465741,2.082064,-4.914883\H,0,-5.255658,0.480766,-4.972833\H,0  
, -5.457607,1.523673,-3.53528\C,0,7.298644,-1.295186,0.573135\H,0,7.414  
847,-1.198151,1.669117\C,0,4.164457,0.558984,-2.996249\H,0,3.147915,0.  
986535,-3.038982\C,0,3.284257,1.49624,1.983397\H,0,2.262191,1.650344,1  
.597399\C,0,7.171951,-2.797805,0.252526\H,0,8.082748,-3.339621,0.56764  
8\H,0,6.308413,-3.245335,0.773821\H,0,7.038323,-2.965336,-0.831826\C,0  
,8.557426,-0.693443,-0.084072\H,0,8.519168,-0.787057,-1.184998\H,0,8.6  
64078,0.378417,0.161568\H,0,9.465797,-1.217913,0.265085\C,0,3.159442,0  
.620502,3.2435\H,0,2.833078,-0.401716,2.986772\H,0,4.115609,0.542922,3  
.792208\H,0,2.41657,1.054577,3.93625\C,0,3.856077,2.887034,2.332166\H,  
0,3.883398,3.541888,1.443427\H,0,3.236295,3.381074,3.10303\H,0,4.88675  
1,2.799263,2.72298\C,0,5.124822,1.53447,-3.707946\H,0,5.127716,2.52538  
6,-3.221196\H,0,6.161215,1.148277,-3.694122\H,0,4.826982,1.672945,-4.7  
63679\C,0,4.108728,-0.795852,-3.727838\H,0,3.787281,-0.644667,-4.77477  
3\H,0,5.095942,-1.292607,-3.754728\H,0,3.37732,-1.463515,-3.245132\C,0  
, -3.039505,-2.881729,1.40903\H,0,-3.539636,-3.847811,1.210894\H,0,-2.0  
75469,-2.868726,0.874425\H,0,-2.839319,-2.825394,2.494575\H,0,-3.37452  
5,-0.772929,1.26227\F,0,-3.989234,0.413059,5.708342\F,0,-4.331515,0.84  
8725,3.597733\F,0,-3.007782,2.122007,4.770558\Version=ES64L-G09RevD.0

1\State=1-A\HF=-3513.6166304\RMSD=1.907e-09\Dipole=2.1122496,-2.446963  
7,5.0205169\Quadrupole=-9.3047597,13.4565063,-4.1517467,-11.6322936,8.  
7764639,-26.6297609\PG=C01[X(C65H69F3N1O4P1)]\@

## TRIP/2E Type II

### Conf0

1\1\GINC-WORKER0\SP\RTSPSS\def2SVP\C65H69F3N1O4P1\JHIOE\05-May-2019  
\0\#p tpsstps\def2svp int=ultrafine empiricdispersion=gd3 scrf=(sm  
d,solvent=ch2cl2,read,externaliteration,dovacuum)\title\0,1\P,0,-0.2  
51952,-0.545172,-0.840162\O,0,-1.686442,0.133539,-1.371612\O,0,0.39618  
4,0.802852,-0.02757\O,0,0.524169,-0.918084,-2.066325\O,0,-0.512652,-1.  
506699,0.316919\C,0,-2.083801,2.125352,-0.109826\C,0,-2.467103,0.83149  
8,-0.471335\C,0,-3.670434,0.210293,-0.013452\C,0,-4.472848,0.927311,0.  
863281\H,0,-5.416291,0.492632,1.208529\C,0,-4.091737,2.21078,1.350367\  
C,0,-2.872426,2.819863,0.877657\C,0,-2.472397,4.063822,1.453238\H,0,-1.  
52827,4.51782,1.139665\C,0,-3.249096,4.689401,2.41799\H,0,-2.913883,5.  
637663,2.852269\C,0,-4.469538,4.106599,2.853337\H,0,-5.076122,4.61328  
2,3.611815\C,0,-4.877781,2.889836,2.329695\H,0,-5.804779,2.417418,2.67  
4142\C,0,-0.859525,2.727994,-0.711635\C,0,0.361696,2.0518,-0.617078\C,  
0,1.606158,2.633806,-1.014384\C,0,1.578032,3.891831,-1.600916\H,0,2.51  
7839,4.368235,-1.899021\C,0,0.353933,4.581169,-1.83898\C,0,-0.88807,3.  
997164,-1.394972\C,0,-2.101982,4.692299,-1.682225\H,0,-3.055235,4.2448  
16,-1.386108\C,0,-2.088941,5.912479,-3.613435,2.026168\H,0,3.233772,-4.  
2556818\C,0,-0.861701,6.501512,-2.748755\H,0,-0.86486,7.468094,-3.264  
226\C,0,0.333522,5.843784,-2.504671\H,0,1.28588,6.279069,-2.828444\C,0  
.4.070366,-3.376393,-0.249454\C,0,4.0378,-4.088876,0.964138\H,0,4.6162  
57,-5.010441,1.077557\C,0,3.265427,-3.613435,2.026168\H,0,3.233772,-4.  
174672,2.964424\C,0,2.507507,-2.42816,1.877132\C,0,2.566129,-1.715677,  
0.661156\H,0,2.064251,-0.751068,0.561529\C,0,3.334336,-2.193702,-0.402  
201\H,0,3.367777,-1.631715,-1.335922\C,0,1.695372,-1.908959,2.998581\C  
0,2.237219,-1.99344,4.390535\H,0,1.821551,-1.205811,5.037672\H,0,3.33  
4955,-1.918173,4.364184\H,0,1.977738,-2.972671,4.834624\H,0,0.549062,-  
1.343593,2.70497\H,0,0.19816,-1.372517,1.671547\C,0,-0.376241,-0.69317  
6,3.577985\C,0,-0.934058,0.513627,3.11298\H,0,-0.630648,0.907413,2.138  
692\C,0,-1.864264,1.190537,3.910151\H,0,-2.285127,2.136889,3.558827\C,  
0,-2.261834,0.653957,5.145178\C,0,-1.72626,-0.566991,5.584764\H,0,-2.0  
51796,-1.001034,6.53581\C,0,-0.780856,-1.248603,4.806012\H,0,-0.394026  
,-2.216991,5.132053\C,0,2.896947,1.922099,-0.739085\C,0,3.631145,1.318  
277,-1.792018\C,0,3.390329,1.872093,0.596059\C,0,4.855227,0.689278,-1.  
488904\C,0,4.61569,1.231304,0.845078\C,0,5.363592,0.627377,-0.182537\H  
0,5.422647,0.210529,-2.296117\H,0,4.995691,1.195708,1.870811\C,0,-4.0  
58719,-1.150209,-0.508425\C,0,-4.026703,-2.271901,0.364245\C,0,-4.4792  
54,-1.313049,-1.858056\C,0,-4.465015,-3.51933,-0.121424\C,0,-4.89411,-  
2.582789,-2.296022\C,0,-4.903596,-3.700043,-1.44274\H,0,-4.45097,-4.38  
7164,0.548438\H,0,-5.219111,-2.70154,-3.336389\H,0,-2.999244,1.182388,  
5.758386\C,0,4.995207,-3.828013,-1.351502\C,0,-4.505466,-0.147924,-2.8  
49377\H,0,-4.148374,0.75401,-2.3246\C,0,-3.516566,-2.168645,1.803758\C  
0,-5.349586,-5.072379,-1.93917\H,0,-5.301435,-5.760815,-1.074433\C,0,  
-4.679989,-2.130262,2.816915\H,0,-4.293638,-2.020162,3.846978\H,0,-5.3  
65704,-1.288452,2.619205\H,0,-5.270276,-3.064698,2.772086\C,0,-4.39281  
5,-5.613453,-3.022\H,0,-4.409526,-4.973593,-3.92363\H,0,-3.352561,-5.6  
49988,-2.652098\H,0,-4.686039,-6.634725,-3.3277\C,0,-6.806377,-5.05551  
4,-2.444013\H,0,-7.126749,-6.070352,-2.743539\H,0,-7.496729,-4.694917,  
-1.660387\H,0,-6.916907,-4.395413,-3.324098\C,0,-3.550195,-0.396414,-4  
.035022\H,0,-3.875478,-1.262501,-4.640774\H,0,-3.524507,0.486835,-4.69  
987\H,0,-2.525095,-0.587201,-3.675514\C,0,-5.939347,0.151845,-3.332855  
\H,0,-5.944334,1.026589,-4.009004\H,0,-6.366957,-0.703937,-3.887066\H,  
0,-6.60888,0.374066,-2.482419\C,0,6.690886,-0.072664,0.097563\H,0,6.90  
5791,-0.709395,-0.780595\C,0,3.138801,1.34194,-3.24045\H,0,2.090887,1.  
688379,-3.228374\C,0,2.628759,2.547519,1.739311\H,0,1.556707,2.527806,  
1.479409\C,0,7.836441,0.953886,0.2257\H,0,8.804933,0.444331,0.384216\H  
0,7.92009,1.573873,-0.68473\H,0,7.662188,1.63068,1.082848\C,0,6.63040  
6,-0.991765,1.332753\H,0,6.511514,-0.411484,2.266048\H,0,5.788852,-1.7  
01747,1.263008\H,0,7.563887,-1.57615,1.422711\C,0,2.775196,1.824095,3.  
089284\H,0,2.550374,0.748668,2.992472\H,0,3.794658,1.921889,3.504622\H  
0,2.076217,2.254437,3.828207\C,0,3.042245,4.030214,1.862013\H,0,2.876  
749,4.570615,0.913377\H,0,2.455801,4.535125,2.651788\H,0,4.113753,4.11  
6506,2.120907\C,0,3.960282,2.348706,-4.073364\H,0,3.916668,3.362742,-3  
.637623\H,0,5.023164,2.046532,-4.120566\H,0,3.576208,2.40442,-5.108578  
\C,0,3.140843,-0.056214,-3.88981\H,0,2.760996,0.00966,-4.926259\H,0,4.  
155696,-0.491277,-3.937157\H,0,2.480238,-0.73615,-3.328034\C,0,-2.5335  
52,-3.303975,2.153525\H,0,-3.035274,-4.288621,2.176648\H,0,-1.708758,-  
3.34065,1.423742\H,0,-2.10222,-3.133213,3.155677\H,0,-2.959905,-1.2199  
7,1.886103\F,0,6.283339,-3.447421,-1.101036\F,0,5.01629,-5.177441,-1.4  
8729\F,0,4.665221,-3.304462,-2.556418\Version=ES64L-G09RevD.01\State=

1-A\HF=-3513.6179709\|RMSD=2.124e-09\|Dipole=0.8325238,-0.1111922,6.2971  
94\|Quadrupole=-12.1824579,-1.5461594,13.7286173,-8.0052176,9.0546708,-  
21.7894102\|PG=C01 [X(C65H69F3N1O4P1)]\|@

**Conf1**

1\|GINC-WORKER1\|SPIRTPSS\|def2SVP\|C65H69F3N1O4P1\|JHIOE\|29-Apr-2019

0\|#p tpsstps/def2svp int=ultrafine empiricaldispersion=gd3 scrf=(sm  
d,solvent=ch2cl2,read,externaliteration,dovacuum)\|title\|0,1\|P,0,-0.2  
48114,-0.485061,-0.9228\|O,0,-1.651579,0.261392,-1.44765\|O,0,0.419767,0  
.796826,-0.023022\|O,0,0.545179,-0.815673,-2.150073\|O,0,-0.562253,-1.49  
8432,0.175229\|C,0,-2.025525,2.184446,-0.077923\|C,0,-2.433915,0.92503,-  
0.522562\|C,0,-3.661407,0.310096,-0.124352\|C,0,-4.459601,0.99269,0.7830  
82\|H,0,-5.419562,0.562791,1.08644\|C,0,-4.055121,2.234104,1.353276\|C,0,  
-2.814045,2.839889,0.936139\|C,0,-2.394694,4.037855,1.590129\|H,0,-1.435  
448,4.487016,1.318072\|C,0,-3.172288,4.623771,2.578893\|H,0,-2.822402,5.  
536228,3.074023\|C,0,-4.412957,4.046079,2.960605\|H,0,-5.019915,4.521784  
,3.738567\|C,0,-4.840967,2.872825,2.35934\|H,0,-5.784435,2.403772,2.6607  
25\|C,0,-0.774106,2.78886,-0.618733\|C,0,0.429152,2.080385,-0.532645\|C,0  
,1.696649,2.660497,-0.852918\|C,0,1.711256,3.952277,-1.362034\|H,0,2.669  
695,4.425915,-1.599907\|C,0,0.508527,4.678543,-1.599224\|C,0,-0.75761,4.  
093893,-1.230883\|C,0,-1.949393,4.826423,-1.517463\|H,0,-2.919319,4.3811  
84,-1.277\|C,0,-1.893671,6.079358,-2.110258\|H,0,-2.822193,6.618326,-2.3  
28605\|C,0,-0.643564,6.666949,-2.443037\|H,0,-0.613372,7.659375,-2.90587  
5\|C,0,0.531856,5.975579,-2.195271\|H,0,1.501803,6.410474,-2.46244\|C,0,3  
.985104,-3.40304,-0.417265\|C,0,3.896421,-4.214082,0.729855\|H,0,4.44551  
,-5.158843,0.780385\|C,0,3.106534,-3.806527,1.807553\|H,0,3.031344,-4.44  
3031,2.693917\|C,0,2.386864,-2.590983,1.738594\|C,0,2.500526,-1.780966,0  
.589391\|H,0,2.026158,-0.798113,0.557683\|C,0,3.287073,-2.189765,-0.4888  
85\|H,0,3.365246,-1.550558,-1.368737\|C,0,1.55629,-2.139436,2.875442\|C,0  
,2.049474,-2.351017,4.271855\|H,0,1.644612,-1.597523,4.965121\|H,0,3.149  
617,-2.322065,4.285122\|H,0,1.734218,-3.348973,4.630671\|N,0,0.435649,-1  
.519203,2.593064\|H,0,0.113746,-1.466883,1.550802\|C,0,-0.493085,-0.8971  
48,3.482715\|C,0,-0.991991,0.358884,3.085757\|H,0,-0.64619,0.804502,2.14  
8485\|C,0,-1.919143,1.017159,3.901714\|H,0,-2.293734,2.000804,3.604371\|C  
,0,-2.372325,0.414992,5.086491\|C,0,-1.895666,-0.852607,5.456235\|H,0,-2  
.265082,-1.336227,6.366437\|C,0,-0.953764,-1.517397,4.658702\|H,0,-0.612  
101,-2.519509,4.928719\|C,0,2.965433,1.910583,-0.57768\|C,0,3.739383,1.3  
76229,-1.639282\|C,0,3.403227,1.76147,0.77036\|C,0,4.943534,0.710932,-1.  
331527\|C,0,4.609845,1.087932,1.023082\|C,0,5.394456,0.547925,-0.013259\|  
H,0,5.539806,0.283482,-2.146868\|H,0,4.946706,0.975539,2.058304\|C,0,-4.  
080668,-1.002127,-0.715232\|C,0,-4.087463,-2.183884,0.077835\|C,0,-4.493  
733,-1.057077,-2.073525\|C,0,-4.553928,-3.380853,-0.494781\|C,0,-4.93935  
4,-2.283559,-2.601811\|C,0,-4.986494,-3.455557,-1.830772\|H,0,-4.56617,-  
4.28862,0.118803\|H,0,-5.261689,-2.327886,-3.649495\|H,0,-3.106917,0.929  
696,5.714591\|C,0,4.931229,-3.781802,-1.528988\|C,0,-4.482382,0.176679,-  
2.97775\|H,0,-4.111915,1.029402,-2.384281\|C,0,-3.592384,-2.191387,1.526  
215\|C,0,-5.473762,-4.770546,-2.432735\|H,0,-5.761376,-4.559934,-3.48009  
3\|C,0,-4.768568,-2.17539,2.524911\|H,0,-4.395003,-2.144142,3.564942\|H,0  
, -5.421469,-1.299075,2.37148\|H,0,-5.390106,-3.083459,2.412479\|C,0,-6.7  
23123,-5.304566,-1.702821\|H,0,-6.495502,-5.552004,-0.649458\|H,0,-7.537  
219,-4.557732,-1.707789\|H,0,-7.096609,-6.223527,-2.190873\|C,0,-4.35162  
2,-5.828612,-2.459822\|H,0,-4.698064,-6.751857,-2.959759\|H,0,-3.465104,  
-5.454652,-3.002363\|H,0,-4.033623,-6.098661,-1.435899\|C,0,-3.517405,-0  
.00556,-4.167376\|H,0,-3.85454,-0.815539,-4.840456\|H,0,-3.461505,0.9242  
7,-4.763223\|H,0,-2.502005,-0.24753,-3.810772\|C,0,-5.90322,0.543866,-3.  
45363\|H,0,-5.880854,1.468561,-4.05924\|H,0,-6.341202,-0.256719,-4.07772  
3\|H,0,-6.579043,0.714161,-2.596224\|C,0,6.698298,-0.192356,0.273305\|H,0  
,6.960801,-0.743449,-0.648853\|C,0,3.307154,1.498294,-3.102041\|H,0,2.27  
97,1.900996,-3.112625\|C,0,2.60542,2.371917,1.925987\|H,0,1.542214,2.370  
606,1.631673\|C,0,7.841893,0.800627,0.570144\|H,0,8.795517,0.264318,0.73  
0299\|H,0,7.982474,1.50816,-0.266514\|H,0,7.624878,1.389694,1.480666\|C,0  
,6.554523,-1.227113,1.406135\|H,0,6.379981,-0.739057,2.382543\|H,0,5.714  
47,-1.915512,1.213516\|H,0,7.476555,-1.829411,1.49696\|C,0,2.707288,1.57  
4262,3.237891\|H,0,2.481695,0.506924,3.075749\|H,0,3.713567,1.644448,3.68  
9217\|H,0,1.987189,1.967118,3.977329\|C,0,3.017161,3.844113,2.145166\|H,0  
,2.881531,4.437246,1.223917\|H,0,2.406818,4.306062,2.943029\|H,0,4.08017  
3,3.911813,2.441605\|C,0,4.210558,2.495863,-3.85651\|H,0,4.209748,3.4870  
94,-3.368973\|H,0,5.255926,2.136577,-3.89097\|H,0,3.861769,2.625711,-4.8  
97565\|C,0,3.259251,0.131301,-3.814024\|H,0,2.945072,0.264475,-4.865916\|  
H,0,4.245876,-0.366475,-3.823343\|H,0,2.526193,-0.527782,-3.32076\|C,0,-  
2.655,-3.381299,1.814481\|H,0,-3.193498,-4.346076,1.778996\|H,0,-1.82738  
8,-3.407692,1.087477\|H,0,-2.22333,-3.284523,2.826397\|H,0,-3.003684,-1.  
270617,1.675258\|F,0,6.213574,-3.416311,-1.23059\|F,0,4.958105,-5.118841  
, -1.753577\|F,0,4.621834,-3.179848,-2.702842\|Version=ES64L-G09RevD.01\|  
State=1-A\HF=-3513.617892\|RMSD=2.134e-09\|Dipole=0.6465577,-0.5445866,6.  
.321251\|Quadrupole=-12.7337149,2.208718,10.5249969,-7.6431537,7.197817  
8,-22.9913322\|PG=C01 [X(C65H69F3N1O4P1)]\|@

Conf2

1\1\GINC-WORKER0\SP\RTSPSS\def2SVP\C65H69F3N1O4P1\JHIOE\05-May-2019  
\\#p tpsstps\def2svp int=ultrafine empiricdispersion=gd3 scrf=(sm  
d,solvent=ch2cl2,read,externaliteration,dovacuum)\title\0,1\P,0,-0.1  
99774,-0.548596,-0.802434\O,0,-1.605893,0.13503,-1.402888\O,0,0.431112  
,0.805965,0.011259\O,0,0.62044,-0.954142,-1.988707\O,0,-0.522552,-1.48  
4675,0.360049\C,0,-2.027101,2.15611,-0.197761\C,0,-2.411105,0.858798,-  
0.545394\C,0,-3.636843,0.260608,-0.116802\C,0,-4.463175,1.006342,0.712  
521\H,0,-5.42443,0.590675,1.031037\C,0,-4.086752,2.297219,1.183457\C,0  
,-2.843769,2.882003,0.743436\C,0,-2.452127,4.135441,1.304237\H,0,-1.49  
1351,4.571713,1.017484\C,0,-3.258919,4.793118,2.221846\H,0,-2.93031,5.  
748574,2.645263\C,0,-4.501808,4.233882,2.623257\H,0,-5.132121,4.765617  
,3.344327\C,0,-4.90231,3.008149,2.114746\H,0,-5.84705,2.553776,2.43436  
6\C,0,-0.772755,2.731555,-0.761896\C,0,0.435607,2.044438,-0.600159\C,0  
,1.701992,2.608832,-0.947496\C,0,1.713564,3.859488,-1.551281\H,0,2.671  
206,4.323751,-1.809351\C,0,0.509822,4.558071,-1.854282\C,0,-0.757255,3.  
989934,-1.46476\C,0,-1.94934,4.692463,-1.817872\H,0,-2.91994,4.255771  
,-1.565246\C,0,-1.892975,5.906151,-2.487\H,0,-2.821743,6.423193,-2.752  
274\C,0,-0.641881,6.481315,-2.837595\H,0,-0.611013,7.443506,-3.360359\  
C,0,0.533802,5.814438,-2.531622\H,0,1.505039,6.237642,-2.812478\C,0,3.  
87503,-3.512219,-0.038626\C,0,3.695489,-4.262052,1.139613\H,0,4.158076  
,-5.248537,1.241368\C,0,2.927122,-3.740854,2.182368\H,0,2.781766,-4.32  
6622,3.094751\C,0,2.311627,-2.475475,2.042688\C,0,2.517391,-1.726477,0.  
865627\H,0,2.115327,-0.714428,0.777278\C,0,3.294409,-2.244246,-0.1737  
83\H,0,3.453249,-1.650442,-1.074817\C,0,1.488218,-1.917218,3.137643\C,  
0,1.963929,-2.051658,4.548967\H,0,1.586481,-1.236289,5.185514\H,0,3.06  
4184,-2.066009,4.568466\H,0,1.607829,-3.009145,4.973465\N,0,0.391474,-  
1.284602,2.798018\H,0,0.090403,-1.308785,1.747074\C,0,-0.53786,-0.5855  
64,3.626598\C,0,-1.036617,0.630109,3.118338\H,0,-0.68868,0.991709,2.14  
636\C,0,-1.967352,1.357275,3.869186\H,0,-2.342822,2.309533,3.484086\C,  
0,-2.424779,0.863081,5.101222\C,0,-1.948781,-0.366165,5.583538\H,0,-2.  
321046,-0.767966,6.531576\C,0,-1.00387,-1.098395,4.85169\H,0,-0.666811  
,-2.07278,5.212209\C,0,2.980165,1.905149,-0.601172\C,0,3.778714,1.3135  
01,-1.615481\C,0,3.418151,1.888542,0.752563\C,0,5.023192,0.757885,-1.2  
62063\C,0,4.669061,1.319426,1.05314\C,0,5.495639,0.763498,0.061066\H,0  
,5.641631,0.308567,-2.047655\H,0,5.023486,1.318206,2.090105\C,0,-4.025  
412,-1.105413,-0.596509\C,0,-4.021341,-2.212598,0.294787\C,0,-4.420427  
,-1.286242,-1.951283\C,0,-4.461335,-3.463763,-0.179444\C,0,-4.83914,-2.  
558962,-2.377006\C,0,-4.876331,-3.66185,-1.506017\H,0,-4.46942,-4.320  
213,0.5049\H,0,-5.144982,-2.691616,-3.421512\H,0,-3.162697,1.430603,5.  
677757\C,0,4.735202,-4.083088,-1.13898\C,0,-4.414298,-0.136095,-2.9598  
47\H,0,-4.05668,0.76905,-2.441017\C,0,-3.543502,-2.087929,1.74326\C,0,  
-5.326651,-5.037868,-1.987987\H,0,-5.298114,-5.712977,-1.111961\C,0,-4.  
730216,-2.00278,2.726392\H,0,-4.366996,-1.878576,3.763232\H,0,-5.3926  
74,-1.151323,2.494311\H,0,-5.339328,-2.925275,2.686396\C,0,-4.358385,-  
5.605062,-3.04683\H,0,-4.356368,-4.981138,-3.959729\H,0,-3.324138,-5.6  
43394,-2.66066\H,0,-4.655485,-6.629215,-3.338892\C,0,-6.775281,-5.0160  
74,-2.515628\H,0,-7.100395,-6.032768,-2.803514\H,0,-7.474326,-4.636262  
,-1.748952\H,0,-6.865952,-4.369662,-3.408096\C,0,-3.438757,-0.411768,-  
4.122684\H,0,-3.760383,-1.283698,-4.721965\H,0,-3.391078,0.461278,-4.7  
99659\H,0,-2.422901,-0.607425,-3.739706\C,0,-5.835763,0.172441,-3.4729  
5\H,0,-5.819343,1.037,-4.16188\H,0,-6.263477,-0.686643,-4.021992\H,0,-  
6.51661,0.41391,-2.636785\C,0,6.864018,0.186577,0.416452\H,0,7.012486,  
0.351193,1.500425\C,0,3.334578,1.284179,-3.079673\H,0,2.28426,1.621223  
,-3.114174\C,0,2.585453,2.541878,1.858711\H,0,1.529176,2.50719,1.54318  
5\C,0,6.925975,-1.332279,0.158923\H,0,7.913447,-1.738312,0.445766\H,0,  
6.155496,-1.867452,0.739196\H,0,6.764407,-1.56155,-0.909159\C,0,7.9978  
38,0.920898,-0.328222\H,0,7.924165,0.765866,-1.420391\H,0,7.964537,2.0  
08406,-0.13649\H,0,8.984891,0.545072,-0.001759\C,0,2.672991,1.808471,3.  
209007\H,0,2.462963,0.731686,3.093726\H,0,3.669461,1.912895,3.675215\  
H,0,1.934442,2.226315,3.916034\C,0,2.967832,4.02992,2.013394\H,0,2.843  
057,4.574286,1.060714\H,0,2.332498,4.519715,2.774389\H,0,4.022654,4.13  
162,2.328864\C,0,4.173095,2.266179,-3.924492\H,0,4.112469,3.294314,-3.  
525122\H,0,5.238633,1.969945,-3.934325\H,0,3.815896,2.283561,-4.970579  
\C,0,3.36873,-0.138461,-3.673478\H,0,3.038577,-0.114722,-4.728633\H,0,  
4.38562,-0.570789,-3.653394\H,0,2.682607,-0.798294,-3.118255\C,0,-2.59  
4175,-3.235098,2.143013\H,0,-3.11834,-4.207582,2.180857\H,0,-1.754612,  
-3.309334,1.433285\H,0,-2.181037,-3.047375,3.149796\H,0,-2.968789,-1.1  
49248,1.816951\F,0,5.983736,-4.390295,-0.689173\F,0,4.218331,-5.235774  
,-1.640848\F,0,4.889151,-3.230379,-2.181083\Version=ES64L-G09RevD.01\  
State=1-A\HF=-3513.6172209\RMSD=2.115e-09\Dipole=0.5290941,0.0499115,6  
.3688697\Quadrupole=-12.6365377,-2.7823625,15.4189002,-5.5071238,7.211  
5688,-22.5331701\PG=C01[X(C65H69F3N1O4P1)]\@

Conf3

1\1\GINC-WORKER1\SP\RTSPSS\def2SVP\C65H69F3N1O4P1\JHIOE\05-May-2019



l0\#p tpsstps/def2svp int=ultrafine empiricaldispersion=gd3 scrf=(sm  
d,solvent=ch2cl2,read,externaliteration,dovacuum)\title\0,1P,0,-0.1  
80576,-0.486323,-0.860199\O,0,-1.551045,0.26135,-1.467754\O,0,0.458012  
,0.808245,0.040932\O,0,0.666057,-0.853605,-2.0403\O,0,-0.563758,-1.470  
239,0.242878\C,0,-1.966595,2.219387,-0.161168\C,0,-2.367637,0.953751,-  
0.595075\C,0,-3.619649,0.362264,-0.240258\C,0,-4.454386,1.078329,0.606  
624\H,0,-5.434563,0.668544,0.87057\C,0,-4.063849,2.329673,1.164711\C,0  
,-2.795234,2.909012,0.796549\C,0,-2.392808,4.118203,1.440626\H,0,-1.41  
4068,4.547023,1.207398\C,0,-3.212086,4.73988,2.372301\H,0,-2.875571,5.  
660504,2.861508\C,0,-4.478752,4.187974,2.703907\H,0,-5.118478,4.691594  
,3.43676\C,0,-4.891325,3.004307,2.112244\H,0,-5.855196,2.554807,2.3766  
76\C,0,-0.685059,2.798111,-0.655946\C,0,0.504796,2.078775,-0.498161\C,  
0,1.791099,2.636597,-0.776692\C,0,1.843095,3.91822,-1.30974\H,0,2.8165  
5,4.376143,-1.514886\C,0,0.661673,4.654206,-1.612211\C,0,-0.626515,4.0  
89695,-1.293012\C,0,-1.794995,4.830205,-1.647377\H,0,-2.780375,4.39960  
8,-1.447143\C,0,-1.697187,6.072721,-2.256252\H,0,-2.608391,6.618021,-  
0.52571\C,0,-0.426272,6.641251,-2.539926\H,0,-0.36306,7.625598,-3.01650  
9\C,0,0.727976,5.940406,-2.228256\H,0,1.714512,6.359079,-2.457858\C,0,  
3.774629,-3.544839,-0.175494\C,0,3.543991,-4.376084,0.937725\H,0,3.972  
912,-5.382239,0.972327\C,0,2.764338,-3.912799,1.999535\H,0,2.578037,-4  
.563024,2.859295\C,0,2.189021,-2.622127,1.94255\C,0,2.448818,-1.791997  
,0.832529\H,0,2.075962,-0.765306,0.810381\C,0,3.237292,-2.252002,-0.22  
5055\H,0,3.435134,-1.595316,-1.073167\C,0,1.342938,-2.121864,3.048961\  
C,0,1.766338,-2.359538,4.463359\H,0,1.387299,-1.576383,5.138423\H,0,2.  
864694,-2.404847,4.517205\H,0,1.371841,-3.332646,4.812067\N,0,0.271707  
,-1.444086,2.715279\H,0,0.006541,-1.396369,1.655398\C,0,-0.671365,-0.7  
75518,3.552856\C,0,-1.129046,0.476902,3.097622\H,0,-0.742249,0.883048,  
2.158379\C,0,-2.068784,1.182139,3.857765\H,0,-2.412352,2.162061,3.5144  
23\C,0,-2.576064,0.630707,5.045249\C,0,-2.141461,-0.633731,5.472693\H,  
0,-2.553448,-1.079194,6.384108\C,0,-1.187899,-1.34541,4.731563\H,0,-0.  
883178,-2.345591,5.04757\C,0,3.046763,1.888075,-0.442535\C,0,3.865024,  
1.353119,-1.47258\C,0,3.447075,1.772284,0.918477\C,0,5.089809,0.752124  
,-1.124309\C,0,4.679289,1.161028,1.213088\C,0,5.524859,0.659222,0.2080  
34\H,0,5.722084,0.344792,-1.921663\H,0,5.004499,1.082852,2.256577\C,0,  
-4.029437,-0.960231,-0.815649\C,0,-4.067244,-2.124247,0.002419\C,0,-4.  
406805,-1.040691,-2.182637\C,0,-4.533571,-3.32825,-0.55517\C,0,-4.8565  
7,-2.272928,-2.694249\C,0,-4.937825,-3.426424,-1.898744\H,0,-4.570117,  
-4.22262,0.076787\H,0,-5.15266,-2.33716,-3.748656\H,0,-3.320785,1.1816  
86,5.629046\C,0,4.636258,-4.059352,-1.302137\C,0,-4.34272,0.169678,-3.  
115538\H,0,-3.978661,1.030525,-2.529803\C,0,-3.605204,-2.101368,1.4613  
18\C,0,-5.427713,-4.748307,-2.483495\H,0,-5.696597,-4.554802,-3.539081  
\C,0,-4.800309,-2.014758,2.43373\H,0,-4.446337,-1.966934,3.479992\H,0,  
-5.41696,-1.119916,2.242859\H,0,-5.452832,-2.902286,2.333402\C,0,-6.69  
3209,-5.258394,-1.764501\H,0,-6.484358,-5.490468,-0.703796\H,0,-7.5004  
49,-4.504749,-1.794498\H,0,-7.067377,-6.182083,-2.243037\C,0,-4.314575  
,-5.816423,-2.472255\H,0,-4.662024,-6.747121,-2.957474\H,0,-3.417027,-  
5.461918,-3.009657\H,0,-4.013919,-6.066976,-1.438188\C,0,-3.336388,-0.  
059596,-4.262368\H,0,-3.658332,-0.885585,-4.923282\H,0,-3.246275,0.851  
478,-4.882494\H,0,-2.338371,-0.302791,-3.860187\C,0,-5.738134,0.549178  
,-3.651827\H,0,-5.677331,1.458872,-4.277145\H,0,-6.167421,-0.258114,-4  
.273331\H,0,-6.440988,0.750558,-2.823262\C,0,6.869034,0.026349,0.56019  
9\H,0,7.010784,0.153128,1.650111\C,0,3.462475,1.422722,-2.947511\H,0,2  
.425824,1.798468,-2.992756\C,0,2.595833,2.367643,2.043315\H,0,1.545475  
,2.352766,1.707371\C,0,6.877447,-1.485808,0.258557\H,0,7.847019,-1.936  
183,0.540385\H,0,6.082776,-2.008217,0.817669\H,0,6.715685,-1.676417,-0  
.816944\C,0,8.038129,0.738051,-0.150268\H,0,7.974831,0.615926,-1.24720  
7\H,0,8.042739,1.820383,0.071066\H,0,9.005913,0.31655,0.177771\C,0,2.6  
57363,1.563723,3.35436\H,0,2.454138,0.493969,3.177542\H,0,3.64333,1.64  
6002,3.846492\H,0,1.902554,1.941438,4.066781\C,0,2.978139,3.844424,2.2  
83562\H,0,2.871043,4.438222,1.358832\H,0,2.329559,4.295375,3.057258\H,  
0,4.027213,3.92648,2.62287\C,0,4.357704,2.418269,-3.714343\H,0,4.31963  
1,3.425057,-3.261469\H,0,5.412578,2.086145,-3.71274\H,0,4.030812,2.504  
244,-4.766908\C,0,3.465181,0.032983,-3.616393\H,0,3.172674,0.124098,-4  
.678965\H,0,4.464516,-0.437872,-3.586033\H,0,2.7378,-0.62952,-3.119488  
\C,0,-2.712603,-3.309066,1.809444\H,0,-3.279507,-4.258013,1.794062\H,0  
,-1.870146,-3.385582,1.103297\H,0,-2.300514,-3.191687,2.82754\H,0,-2.9  
89799,-1.195334,1.591762\F,0,5.861316,-4.454544,-0.856814\F,0,4.083811  
,-5.143494,-1.907801\F,0,4.847391,-3.131227,-2.267282\Version=ES64L-G  
09RevD.01\State=1-A\HF=-3513.6171451\RMSE=2.061e-09\Dipole=0.3160675,-  
0.3493171,6.3937597\Quadrupole=-12.9074242,0.2214301,12.6859941,-4.978  
4625,5.5676663,-23.7363564\PG=C01 [X(C65H69F3N1O4P1)]\@

#### TRIP/2E Switching TS

#### Conf0

1\1\GINC-WORKER0\SP\IRTPSS\def2SVP\C65H69F3N1O4P1\JHIOE\29-Apr-2019

l0\#p tpsstps/def2svp int=ultrafine empiricaldispersion=gd3 scrf=(sm  
d,solvent=ch2cl2,read,externaliteration,dovacuum)\title\0,1P,0,-0.1  
26727,0.039424,-0.427595\O,0,1.122372,0.953558,0.226313\O,0,-1.277575,  
1.259786,-0.602067\O,0,-0.523336,-0.940285,0.656727\O,0,0.159356,-0.47  
6635,-1.819212\O,0,0.564954,3.27472,-0.00941\O,0,1.425549,2.203494,-0.  
269942\O,0,2.672104,2.352344,-0.955731\O,0,3.012038,3.615648,-1.42058\  
H,0,3.969574,3.76342,-1.93125\O,0,2.128303,4.725661,-1.285174\O,0,0.87  
6387,4.55797,-0.587492\O,0,-0.017267,5.669988,-0.526413\H,0,-0.986816,  
5.547464,-0.03477\O,0,0.320205,6.891616,-1.090391\H,0,-0.386196,7.7274  
71,-1.03726\O,0,1.569928,7.065418,-1.743638\H,0,1.827534,8.036832,-2.1  
79786\O,0,2.451519,6.000296,-1.841048\H,0,3.409915,6.115752,-2.36021\  
O,0,-0.637072,3.054098,0.843971\O,0,-1.538597,2.03931,0.509706\O,0,-2.  
754296,1.804641,1.227332\O,0,-3.031488,2.621828,2.314477\H,0,-3.973926  
,2.497224,2.857334\O,0,-2.113133,3.616156,2.7608\O,0,-0.884253,3.82769  
3,2.035475\O,0,0.050818,4.774349,2.554\H,0,1.007519,4.913955,2.042514\  
O,0,-0.229717,5.50355,3.700339\H,0,0.506933,6.218974,4.082351\O,0,-1.4  
60052,5.325011,4.387956\H,0,-1.672511,5.911663,5.288449\O,0,-2.37836,4  
.3946,3.92766\H,0,-3.321176,4.229625,4.461788\O,0,-3.707911,0.742521,0  
.76457\O,0,-3.810459,-0.496282,1.457817\O,0,-4.513469,0.9871,-0.378677  
\O,0,-4.717653,-1.461167,0.983817\O,0,-5.409687,-0.010176,-0.808611\O,  
0,-5.523754,-1.243845,-0.148223\H,0,-4.79679,-2.415575,1.51574\H,0,-6.  
032754,0.176304,-1.691891\O,0,3.561415,1.160903,-1.139782\O,0,3.756959  
,0.607056,-2.433399\O,0,4.199502,0.573675,-0.011185\O,0,4.60972,-0.505  
623,-2.571978\O,0,5.028239,-0.546659,-0.200941\O,0,5.25487,-1.099848,-  
1.475596\H,0,4.772085,-0.930369,-3.570268\H,0,5.51937,-0.993052,0.6715  
53\O,0,4.055848,1.164869,1.393251\H,0,3.328292,1.991669,1.340114\O,0,3  
.065719,1.171691,-3.677018\O,0,6.161231,-2.312799,-1.673934\H,0,6.2690  
61,-2.455423,-2.765843\O,0,4.07867,1.850014,-4.6221\H,0,4.640077,2.648  
903,-4.105173\H,0,4.811855,1.119946,-5.012767\H,0,3.558926,2.302292,-5  
.486941\O,0,5.525942,-3.596285,-1.098558\H,0,4.523369,-3.772963,-1.526  
82\H,0,6.155679,-4.476369,-1.32565\H,0,5.421593,-3.531382,-0.001242\O,  
0,7.570774,-2.086741,-1.09199\H,0,7.539758,-1.975452,0.00745\H,0,8.227  
363,-2.94598,-1.321433\H,0,8.036886,-1.177579,-1.512361\O,0,3.51342,0.  
142287,2.409768\H,0,2.549914,-0.27478,2.073623\H,0,4.223696,-0.687707,  
2.563431\H,0,3.353245,0.625467,3.391174\O,0,5.393858,1.770977,1.86831\  
H,0,5.272652,2.254528,2.855302\H,0,6.173441,0.992804,1.965637\H,0,5.76  
2029,2.532045,1.156874\O,0,-6.50665,-2.305078,-0.636279\H,0,-6.9035,-1  
.954115,-1.60761\O,0,-2.984238,-0.785342,2.712935\H,0,-2.107918,-0.116  
009,2.682495\O,0,-4.436411,2.308541,-1.145392\H,0,-3.695381,2.948175,-  
0.636755\O,0,-5.828334,-3.669326,-0.87526\H,0,-5.434519,-4.094306,0.06  
6066\H,0,-6.553185,-4.393641,-1.289821\H,0,-4.990138,-3.578151,-1.5872  
87\O,0,-7.697827,-2.44047,0.335877\H,0,-8.212391,-1.472595,0.472921\H,  
0,-8.435106,-3.17108,-0.045115\H,0,-7.358514,-2.787602,1.32948\O,0,-3.  
94362,2.1037,-2.591849\H,0,-3.803796,3.079395,-3.092643\H,0,-2.979041,  
1.568869,-2.604373\H,0,-4.674644,1.526305,-3.1872\O,0,-5.782029,3.0614  
54,-1.110249\H,0,-6.110339,3.242233,-0.070849\H,0,-5.690491,4.040447,-  
1.615638\H,0,-6.578002,2.491145,-1.623836\O,0,-3.7976,-0.470912,3.9874  
41\H,0,-4.691095,-1.120193,4.050463\H,0,-3.185461,-0.644375,4.891849\H  
,0,-4.142518,0.57687,4.005848\O,0,-2.445339,-2.227208,2.763529\H,0,-1.  
746052,-2.337831,3.612527\H,0,-3.251979,-2.970118,2.905597\H,0,-1.8934  
44,-2.460962,1.841216\O,0,2.238764,0.098588,-4.414052\H,0,1.711329,0.5  
52193,-5.273914\H,0,2.877604,-0.713339,-4.808015\H,0,1.486946,-0.33466  
,-3.732971\H,0,2.35579,1.945617,-3.339931\O,0,2.470902,-3.847655,2.227  
989\O,0,1.403329,-4.677978,2.613104\H,0,1.445933,-5.227791,3.557514\O,  
0,0.28701,-4.800375,1.784289\H,0,-0.541542,-5.437941,2.102578\O,0,0.21  
5969,-4.080365,0.568442\O,0,1.303201,-3.253965,0.193346\H,0,1.29202,-2  
.710877,-0.756492\O,0,2.423249,-3.139493,1.017105\H,0,3.254463,-2.4997  
16,0.71359\O,0,-0.960511,-4.186169,-0.310699\O,0,-1.822009,-5.404904,-  
0.304773\H,0,-1.992835,-5.717057,0.738432\H,0,-1.306077,-6.241756,-0.8  
09262\H,0,-2.791678,-5.226541,-0.790873\H,0,-1.215073,-3.15617,-1.0925  
93\H,0,-0.715147,-2.269969,-0.85883\O,0,-2.132373,-3.042968,-2.17515\  
O,0,-2.296664,-4.088646,-3.10463\H,0,-1.718634,-5.011408,-3.009131\O,0  
,-3.178174,-3.916596,-4.178429\H,0,-3.305067,-4.726065,-4.904628\O,0,-  
3.875709,-2.708045,-4.335567\O,0,-3.687856,-1.665267,-3.414718\H,0,-4.  
226671,-0.721642,-3.532226\O,0,-2.816667,-1.823016,-2.331426\H,0,-2.68  
8982,-1.020842,-1.600182\H,0,-4.559968,-2.575996,-5.180118\O,0,3.65043  
1,-3.691314,3.15736\O,0,3.965689,-4.854248,3.779991\O,0,4.76964,-3.267  
415,2.51348\O,0,3.397941,-2.782498,4.137994\Version=ES64L-G09RevD.01\  
State=1-A\HF=-3513.6072361\IRMSD=4.694e-09\Dipole=-2.3406352,-4.8416816  
,-0.8551587\Quadrupole=-15.7819396,34.2362665,-18.4543269,17.4995955,3  
.8230971,9.5584936\PG=C01[X(C65H69F3N1O4P1)]\@

#### Conf1

11\GINC-WORKER0\SP\RTSPSTPS\def2SVP\C65H69F3N1O4P1\JHIOE\03-May-2019  
\#p tpsstps/def2svp int=ultrafine empiricaldispersion=gd3 scrf=(sm  
d,solvent=ch2cl2,read,externaliteration,dovacuum)\title\0,1P,0,-0.1  
557,0.028222,-0.404327\O,0,1.034305,1.017155,0.250479\O,0,-1.355159,1.

188475,-0.6433\O,0,-0.530209,-0.936561,0.700594\O,0,0.183359,-0.514408  
-1.774104\C,0,0.393253,3.299134,-0.110794\C,0,1.30526,2.254665,-0.292  
474\C,0,2.568805,2.423345,-0.942064\C,0,2.862148,3.669558,-1.478649\H,  
0,3.828386,3.833796,-1.967563\C,0,1.92649,4.744088,-1.429899\C,0,0.667  
692,4.562914,-0.747408\C,0,-0.267846,5.641506,-0.757497\H,0,-1.240211,  
5.50697,-0.274551\C,0,0.031208,6.843353,-1.382511\H,0,-0.707192,7.6528  
43,-1.383637\C,0,1.282976,7.030157,-2.028179\H,0,1.508835,7.984999,-2.  
515495\C,0,2.206662,5.996993,-2.054238\H,0,3.168592,6.122317,-2.564482  
\C,0,-0.816325,3.069646,0.730805\C,0,-1.667015,2.001501,0.430859\C,0,-  
2.878553,1.738948,1.145862\C,0,-3.205035,2.58562,2.195993\H,0,-4.14491  
4,2.437037,2.737278\C,0,-2.341262,3.642386,2.606023\C,0,-1.116176,3.88  
3703,1.883101\C,0,-0.236643,4.89901,2.368046\H,0,0.716745,5.067136,1.8  
5933\C,0,-0.566645,5.662152,3.478582\H,0,0.128186,6.430922,3.834421\C,  
0,-1.793328,5.450725,4.163149\H,0,-2.044876,6.064018,5.035362\C,0,-2.6  
58104,4.455761,3.735689\H,0,-3.597431,4.266446,4.267956\C,0,-3.77964,0  
.618116,0.716539\C,0,-3.829991,-0.600796,1.44969\C,0,-4.590889,0.78875  
3,-0.436324\C,0,-4.691504,-1.620095,1.00492\C,0,-5.439879,-0.261133,-0  
.835948\C,0,-5.502026,-1.476216,-0.135516\H,0,-4.73146,-2.558536,1.568  
422\H,0,-6.067118,-0.132375,-1.726602\C,0,3.530456,1.275315,-0.986271\  
C,0,3.82094,0.619374,-2.214565\C,0,4.137424,0.825152,0.218055\C,0,4.71  
9686,-0.463795,-2.211742\C,0,5.030773,-0.260542,0.166161\C,0,5.332317,  
-0.925954,-1.03385\H,0,4.938829,-0.966815,-3.160942\H,0,5.5029,-0.6064  
41,1.092955\C,0,3.872417,1.496681,1.567231\H,0,3.122172,2.289868,1.412  
292\C,0,3.181291,1.045914,-3.538316\C,0,6.298984,-2.107645,-1.0475\H,0  
,6.571764,-2.312424,0.004658\C,0,4.225817,1.683377,-4.477867\H,0,0.4721  
461,2.548645,-4.002138\H,0,5.010918,0.954727,-4.75356\H,0,3.747185,2.0  
33534,-5.411077\C,0,7.594003,-1.764509,-1.812886\H,0,8.086158,-0.87211  
5,-1.386459\H,0,8.310429,-2.605449,-1.767966\H,0,7.382266,-1.557994,-2  
.878364\C,0,5.642027,-3.383376,-1.613068\H,0,5.355925,-3.252793,-2.672  
831\H,0,6.342203,-4.23703,-1.557532\H,0,4.732707,-3.649656,-1.046039\C  
,0,3.288852,0.507069,2.59567\H,0,2.377607,0.025965,2.203474\H,0,4.0172  
31,-0.279703,2.857517\H,0,3.022097,1.03747,3.528488\C,0,5.147404,2.179  
866,2.105152\H,0,4.934165,2.711636,3.050783\H,0,5.944468,1.440346,2.30  
6374\H,0,5.541779,2.915111,1.380675\C,0,-6.436724,-2.594424,-0.589682\  
H,0,-6.841123,-2.296143,-1.575466\C,0,-2.998057,-0.813155,2.71614\H,0,  
-2.146913,-0.113425,2.663951\C,0,-4.56978,2.086302,-1.246454\H,0,-3.86  
8821,2.779161,-0.750966\C,0,-5.702783,-3.938072,-0.773872\H,0,-5.29978  
9,-4.312974,0.184768\H,0,-6.395246,-4.705015,-1.166459\H,0,-4.863237,-  
3.839689,-1.483405\C,0,-7.62816,-2.742196,0.380478\H,0,-8.179365,-1.79  
0317,0.482856\H,0,-8.335141,-3.512357,0.020536\H,0,-7.282093,-3.04317,  
1.386737\C,0,-4.046794,1.85775,-2.678853\H,0,-3.944664,2.821913,-3.210  
151\H,0,-3.058072,1.369159,-2.659884\H,0,-4.740689,1.227071,-3.264501\  
C,0,-5.951515,2.771079,-1.251809\H,0,-6.299317,2.972195,-0.222491\H,0,  
-5.904079,3.734575,-1.791845\H,0,-6.712577,2.143342,-1.750869\C,0,-3.8  
28041,-0.483544,3.976057\H,0,-4.698113,-1.161798,4.058287\H,0,-3.21500  
3,-0.603915,4.88848\H,0,-4.209753,0.551407,3.956255\C,0,-2.407022,-2.2  
32036,2.820345\H,0,-1.695765,-2.281563,3.665131\H,0,-3.185242,-2.99627  
3,3.002584\H,0,-1.856094,-2.485125,1.90232\C,0,2.442816,-0.120577,-4.2  
26076\H,0,1.961765,0.232425,-5.157341\H,0,3.134351,-0.938971,-4.499565  
\H,0,1.659541,-0.519405,-3.559581\H,0,2.423944,1.815169,-3.311775\C,0,  
2.753475,-3.666009,2.220085\C,0,1.744699,-4.539596,2.664009\H,0,1.8582  
41,-5.078951,3.608723\C,0,0.597825,-4.723986,1.889795\H,0,-0.182497,-5  
.398351,2.251006\C,0,0.438043,-4.027124,0.668923\C,0,1.46248,-3.14812,  
0.240117\H,0,1.383166,-2.617009,-0.713381\C,0,2.611394,-2.968032,1.010  
755\H,0,3.39295,-2.287016,0.666075\C,0,-0.754834,-4.224603,-0.171695\C  
,0,-1.542126,-5.491141,-0.109934\H,0,-1.666873,-5.784595,0.945374\H,0,  
-0.99132,-6.309932,-0.607363\H,0,-2.533085,-5.382143,-0.572986\N,0,-1.  
085749,-3.235572,-0.977848\H,0,-0.633327,-2.31637,-0.779619\C,0,-2.017  
458,-3.206336,-2.052753\C,0,-2.147414,-4.295525,-2.936959\H,0,-1.53488  
8,-5.191181,-2.807001\C,0,-3.037157,-4.20052,-4.013379\H,0,-3.136433,-  
5.043912,-4.704422\C,0,-3.77718,-3.024977,-4.219234\C,0,-3.624733,-1.9  
38685,-3.343391\H,0,-4.196524,-1.020355,-3.498816\C,0,-2.746607,-2.019  
609,-2.25726\H,0,-2.646388,-1.182374,-1.5617\H,0,-4.467136,-2.952931,-  
5.066411\C,0,3.98436,-3.469324,3.072543\F,0,4.412351,-4.634661,3.62075  
4\F,0,5.024639,-2.952268,2.371115\F,0,3.749097,-2.619159,4.109412\\Ver  
sion=ES64L-G09RevD.01\State=1-A\HF=-3513.6070822\RMSE=4.627e-09\Dipole  
=-2.0930171,-4.9468465,-0.726474\Quadrupole=-17.7116987,36.4686815,-18  
.7569828,15.2310487,3.3327362,7.6537515\PG=C01 [X(C65H69F3N1O4P1)]\@

**Conf2**

1\1\GINC-WORKER1\SP\RTSPSTPSS\def2SVPC65H69F3N1O4P1\JHIOE\29-Apr-2019  
\0\#p tpsstps\def2svp int=ultrafine empiricdispersion=gd3 scrf=(sm  
d,solvent=ch2cl2,read,externaliteration,dovacuum)\title\0,1\P,0,-0.2  
36562,-0.045898,-0.397723\O,0,0.904678,1.033761,0.208701\O,0,-1.51622,  
1.028515,-0.607933\O,0,-0.512511,-1.037434,0.712839\O,0,0.113418,-0.56  
7018,-1.772489\C,0,0.136418,3.254735,-0.270969\C,0,1.091063,2.244199,-

0.429053\C,0,2.308262,2.431029,-1.156682\C,0,2.523652,3.661757,-1.7614  
64\H,0,3.461859,3.842531,-2.296178\C,0,1.547311,4.698722,-1.720239\C,0  
,0.322501,4.492116,-0.986711\C,0,-0.668644,5.519444,-1.025277\H,0,-1.6  
20374,5.361064,-0.509633\C,0,-0.44667,6.702754,-1.714347\H,0,-1.225241  
,7.473417,-1.73428\C,0,0.778094,6.921123,-2.400713\H,0,0.943776,7.8627  
81,-2.93553\C,0,1.750601,5.933654,-2.407053\H,0,2.690793,6.080322,-2.9  
51079\C,0,-1.028296,3.017959,0.627958\C,0,-1.826385,1.887144,0.428713\  
C,0,-2.990881,1.604768,1.210678\C,0,-3.332338,2.504537,2.211264\H,0,-4  
.238403,2.335486,2.801935\C,0,-2.521347,3.636231,2.514032\C,0,-1.33467  
,3.891031,1.734328\C,0,-0.497637,4.982444,2.119314\H,0,0.43003,5.16458  
8,1.569596\C,0,-0.83612,5.803813,3.18485\H,0,-0.17429,6.631298,3.46354  
7\C,0,-2.028946,5.577497,3.92252\H,0,-2.288806,6.237367,4.757489\C,0,-  
2.849202,4.509766,3.594575\H,0,-3.760861,4.309254,4.169092\C,0,-3.8176  
73,0.385815,0.928676\C,0,-3.787291,-0.724325,1.815908\C,0,-4.646409,0.  
352425,-0.225963\C,0,-4.610031,-1.832621,1.536261\C,0,-5.443093,-0.782  
296,-0.464568\C,0,-5.451046,-1.882604,0.412208\H,0,-4.604621,-2.687472  
,2.223077\H,0,-6.086772,-0.799138,-1.352063\C,0,3.329079,1.334835,-1.2  
08798\C,0,3.541032,0.603182,-2.407464\C,0,4.100043,1.043532,-0.050114\  
C,0,4.546428,-0.38295,-2.428083\C,0,5.080818,0.037022,-0.117228\C,0,5.  
329799,-0.682172,-1.301014\H,0,4.726485,-0.941431,-3.354682\H,0,5.6732  
51,-0.182341,0.778561\C,0,3.923831,1.833099,1.249098\H,0,3.09951,2.550  
103,1.098758\C,0,2.722742,0.871217,-3.672823\C,0,6.40206,-1.767185,-1.  
370679\H,0,6.516078,-2.03477,-2.438142\C,0,3.541416,1.685531,-4.696952  
\H,0,3.888569,2.642932,-4.270858\H,0,4.433052,1.11978,-5.0263\H,0,2.93  
2058,1.910679,-5.591685\C,0,5.962923,-3.041035,-0.617914\H,0,5.000351,  
-3.421018,-1.003573\H,0,6.718457,-3.840324,-0.732414\H,0,5.841527,-2.8  
42362,0.461284\C,0,7.770775,-1.271831,-0.863884\H,0,7.739579,-1.03336,  
0.215032\H,0,8.541954,-2.050161,-1.009857\H,0,8.093612,-0.363328,-1.40  
3232\C,0,3.531986,0.930157,2.434056\H,0,2.612557,0.364304,2.209968\H,0,  
4.335683,0.214597,2.678504\H,0,3.346232,1.541903,3.336083\C,0,5.18821  
9,2.659229,1.565898\H,0,5.033078,3.272306,2.472691\H,0,6.06062,2.00409  
7,1.745816\H,0,5.439804,3.338303,0.731315\C,0,-6.356397,-3.088746,0.17  
3003\H,0,-6.190716,-3.786456,1.015538\C,0,-2.915359,-0.732109,3.073815  
\H,0,-2.159449,0.062063,2.951015\C,0,-4.725978,1.542102,-1.184907\H,0,  
-4.017229,2.308352,-0.828277\C,0,-7.844955,-2.683964,0.187495\H,0,-8.0  
78355,-1.993741,-0.644108\H,0,-8.492834,-3.572965,0.078081\H,0,-8.1119  
97,-2.178329,1.132775\C,0,-5.99832,-3.836377,-1.1267\H,0,-4.941665,-4.  
156472,-1.12568\H,0,-6.630526,-4.735968,-1.243219\H,0,-6.157644,-3.195  
992,-2.013131\C,0,-4.303455,1.166589,-2.618207\H,0,-4.296355,2.064227,  
-3.263617\H,0,-3.290104,0.73129,-2.62572\H,0,-5.003633,0.439409,-3.068  
701\C,0,-6.130122,2.18092,-1.158562\H,0,-6.410424,2.48196,-0.133032\H,  
0,-6.159773,3.081209,-1.799732\H,0,-6.899228,1.477674,-1.528137\C,0,-3  
.759039,-0.404166,4.324756\H,0,-4.525478,-1.183423,4.495419\H,0,-3.118  
647,-0.354096,5.224932\H,0,-4.280854,0.563038,4.223642\C,0,-2.150654,-  
2.055985,3.267906\H,0,-1.462056,-1.969444,4.128811\H,0,-2.83244,-2.900  
768,3.477715\H,0,-1.551697,-2.283068,2.37257\C,0,2.178236,-0.421069,-4  
.311709\H,0,1.535029,-0.170271,-5.175581\H,0,2.990827,-1.071116,-4.685  
221\H,0,1.56946,-0.979699,-3.582839\H,0,1.849256,1.476626,-3.375572\C,  
0,2.973319,-3.287961,2.437882\C,0,2.143052,-4.388319,2.709381\H,0,2.25  
7674,-4.9484,3.641225\C,0,1.168968,-4.766813,1.782596\H,0,0.519495,-5.  
615164,2.013483\C,0,0.998704,-4.033906,0.585349\C,0,1.847161,-2.930653  
,0.324634\H,0,1.76149,-2.369669,-0.611014\C,0,2.831161,-2.564854,1.242  
324\H,0,3.485974,-1.719554,1.020515\C,0,-0.051156,-4.393746,-0.384685\  
C,0,-0.489365,-5.809127,-0.563172\H,0,-0.510855,-6.319714,0.412136\H,  
0,24692,-6.348007,-1.187716\H,0,-1.479398,-5.877378,-1.03752\N,0,-0.5  
72144,-3.410173,-1.087105\H,0,-0.332561,-2.4392,-0.788518\C,0,-1.48571  
,-3.45918,-2.180579\C,0,-1.320962,-4.37742,-3.23397\H,0,-0.482618,-5.0  
78746,-3.231439\C,0,-2.219383,-4.350686,-4.308275\H,0,-2.091262,-5.059  
248,-5.133066\C,0,-3.265199,-3.414662,-4.334149\C,0,-3.408247,-2.49220  
8,-3.28491\H,0,-4.219143,-1.759295,-3.300753\C,0,-2.519127,-2.504153,-  
2.205179\H,0,-2.632967,-1.797036,-1.379076\H,0,-3.964277,-3.397814,-5.  
17681\C,0,3.996076,-2.849463,3.458565\F,0,4.386048,-3.863512,4.267653\  
F,0,5.119646,-2.34756,2.876751\F,0,3.511337,-1.86847,4.267122\Version  
=E564L-G09RevD.01\State=1-A\HF=-3513.6051754\RMSE=4.412e-09\Dipole=-0.  
984357,-5.2731299,-1.1084255\Quadrupole=-20.6458054,40.6653368,-20.019  
5315,5.6342927,1.3009998,11.1672736\PG=C01 [X(C65H69F3N1O4P1)]\@

### Conf3

1\1\GINC-WORKER0\SPIRTPSS\def2SVP\C65H69F3N1O4P1\JHIOE\29-Apr-2019  
\0\#p tpsstps\def2svp int=ultrafine empiricdispersion=gd3 scrf=(sm  
d,solvent=ch2cl2,read,externaliteration,dovacuum)\title\0,1\F,0,-0.2  
15755,-0.106495,-0.26437\O,0,0.805073,1.097644,0.317519\O,0,-1.591082,  
0.823352,-0.555867\O,0,-0.420926,-1.072536,0.880618\O,0,0.223251,-0.62  
9931,-1.617047\C,0,-0.155101,3.208807,-0.278492\C,0,0.897106,2.292495,  
-0.367354\C,0,2.114161,2.569746,-1.064406\C,0,2.218561,3.783186,-1.731  
222\H,0,3.14933,4.034092,-2.250631\C,0,1.137372,4.710568,-1.775643\C,0  
,-0.076124,4.422921,-1.050294\C,0,-1.160512,5.346333,-1.152941\H,0,-2.

100214,5.124443,-0.638409\C,0,-1.042006,6.508075,-1.901674\H,0,-1.8897  
88,7.198734,-1.970355\C,0,0.166643,6.806822,-2.586443\H,0,0.249618,7.7  
30859,-3.169051\C,0,1.231401,5.921663,-2.525412\H,0,2.162998,6.132361,  
-3.063047\C,0,-1.313749,2.897991,0.605278\C,0,-2.009285,1.697883,0.428  
8\C,0,-3.18342,1.362973,1.173497\C,0,-3.625507,2.267193,2.129945\H,0,-  
4.544937,2.056552,2.685873\C,0,-2.908569,3.463228,2.422736\C,0,-1.7212  
88,3.781887,1.668398\C,0,-0.982585,4.948473,2.033062\H,0,-0.05555,5.18  
0156,1.500733\C,0,-1.414579,5.777551,3.057891\H,0,-0.826738,6.663297,3  
.323141\C,0,-2.608064,5.484422,3.770944\H,0,-2.942199,6.151213,4.57340  
3\C,0,-3.334666,4.345664,3.460803\H,0,-4.245525,4.096217,4.017112\C,0,  
-3.948558,0.107189,0.875488\C,0,-3.868803,-1.014306,1.743739\C,0,-4.79  
4709,0.067099,-0.266001\C,0,-4.668601,-2.139908,1.465276\C,0,-5.566401  
,-1.084703,-0.504806\C,0,-5.533473,-2.194154,0.359387\H,0,-4.62818,-3.  
003453,2.139665\H,0,-6.226166,-1.106456,-1.380279\C,0,3.255502,1.59861  
7,-1.013509\C,0,3.607774,0.833487,-2.159647\C,0,4.007545,1.471153,0.18  
4839\C,0,4.723838,-0.020732,-2.088774\C,0,5.120859,0.609281,0.201149\C  
,0,5.500935,-0.142635,-0.92284\H,0,4.996932,-0.604748,-2.975048\H,0,5.  
707043,0.512397,1.122601\C,0,3.646134,2.239182,1.457609\H,0,2.77115,2.  
872635,1.234487\C,0,2.820646,0.934106,-3.468423\C,0,6.716136,-1.06535,  
-0.868853\H,0,7.123067,-1.001906,0.15736\C,0,3.594299,1.773033,-4.5079  
22\H,0,3.825462,2.782141,-4.123993\H,0,4.551255,1.285705,-4.772915\H,0  
,3.002681,1.886583,-5.435152\C,0,7.820077,-0.601155,-1.841175\H,0,8.11  
6362,0.443588,-1.638479\H,0,8.718673,-1.237821,-1.743757\H,0,7.47711,-  
0.659217,-2.890763\C,0,6.333497,-2.537114,-1.125652\H,0,5.924411,-2.67  
3875,-2.143704\H,0,7.21987,-3.190703,-1.028809\H,0,5.573842,-2.88306,-  
0.403866\C,0,3.239937,1.27877,2.594729\H,0,2.409898,0.625218,2.278455\  
H,0,4.087441,0.643146,2.90619\H,0,2.907581,1.851799,3.480209\C,0,4.784  
869,3.181753,1.898248\H,0,4.478726,3.769538,2.783171\H,0,5.695492,2.61  
6988,2.170242\H,0,5.051505,3.889908,1.093096\C,0,-6.424048,-3.412612,0  
.126616\H,0,-6.22807,-4.117733,0.956333\C,0,-2.967237,-1.009202,2.9799  
05\H,0,-2.205772,-0.226729,2.820292\C,0,-4.917064,1.263502,-1.2122\H,0  
,-4.232211,2.049067,-0.850705\C,0,-7.917837,-3.030287,0.181328\H,0,-8.  
182025,-2.337361,-0.638761\H,0,-8.554877,-3.928129,0.08087\H,0,-8.1688  
52,-2.535825,1.136871\C,0,-6.086637,-4.139273,-1.190255\H,0,-5.028467,  
-4.452418,-1.213875\H,0,-6.715105,-5.041444,-1.306981\H,0,-6.267902,-3  
.48772,-2.064439\C,0,-4.484565,0.913985,-2.649278\H,0,-4.51814,1.81428  
2,-3.290017\H,0,-3.453276,0.522432,-2.663178\H,0,-5.152892,0.158212,-3  
.10135\C,0,-6.340809,1.856595,-1.177086\H,0,-6.627319,2.138851,-0.1479  
01\H,0,-6.400306,2.761612,-1.809437\H,0,-7.088471,1.13323,-1.551686\C,  
0,-3.774533,-0.653682,4.247015\H,0,-4.548259,-1.419154,4.445163\H,0,-3  
.111078,-0.60333,5.130273\H,0,-4.283267,0.320398,4.147841\C,0,-2.21290  
7,-2.337861,3.177604\H,0,-1.484191,-2.236932,4.002867\H,0,-2.8961,-3.1  
65669,3.4431\H,0,-1.65583,-2.604126,2.265903\C,0,2.444881,-0.444531,-4  
.04607\H,0,1.834644,-0.314285,-4.95896\H,0,3.337705,-1.032221,-4.32887  
1\H,0,1.84874,-1.016054,-3.31655\H,0,1.875113,1.457129,-3.245014\C,0,3  
.57705,-3.109218,2.226137\C,0,2.905449,-4.30674,2.522041\H,0,3.210082,  
-4.913086,3.379317\C,0,1.848517,-4.726475,1.71041\H,0,1.329748,-5.6555  
89,1.958629\C,0,1.442489,-3.948641,0.600768\C,0,2.131864,-2.74359,0.31  
8168\H,0,1.870065,-2.137691,-0.55503\C,0,3.188656,-2.327023,1.125832\H  
,0,3.717206,-1.400798,0.88807\C,0,0.337532,-4.38652,-0.271363\C,0,-0.0  
32042,-5.828658,-0.384952\H,0,-0.019952,-6.29377,0.613492\H,0,0.720615  
,-6.360364,-0.995411\H,0,-1.02524,-5.965483,-0.835778\H,0,-0.298744,-3  
.455419,-0.950094\H,0,-0.089745,-2.46108,-0.712138\C,0,-1.277017,-3.58  
0132,-1.980723\C,0,-1.118987,-4.497792,-3.03607\H,0,-0.24214,-5.149321  
,-3.077019\C,0,-2.076289,-4.533869,-4.058058\H,0,-1.953843,-5.242598,-  
4.883579\C,0,-3.171584,-3.656342,-4.033541\C,0,-3.309396,-2.734209,-2.  
983386\H,0,-4.159085,-2.04745,-2.958843\C,0,-2.365077,-2.687187,-1.952  
582\H,0,-2.477094,-1.980858,-1.125075\H,0,-3.915123,-3.685407,-4.83691  
9\C,0,4.714477,-2.641136,3.102026\F,0,5.297125,-3.658948,3.779686\F,0,  
5.690759,-2.028637,2.380944\F,0,4.298728,-1.73857,4.032671\|Version=ES  
64L-G09RevD.01\State=1-A\HF=-3513.6052377\|RMSD=4.196e-09\|Dipole=-0.677  
3552,-5.204177,-1.1071978\|Quadrupole=-20.2746366,41.2347341,-20.960097  
5,0.1185029,1.4294712,8.9734658\|PG=C01 [X(C65H69F3N1O4P1)]\|@

## References

- (1) Sorgenfrei, N.; Hioe, J.; Greindl, J.; Rothermel, K.; Morana, F.; Lokesh, N.; Gschwind, R. M. NMR Spectroscopic Characterization of Charge Assisted Strong Hydrogen Bonds in Brønsted Acid Catalysis. *J. Am. Chem. Soc.* **2016**, *138* (50), 16345–16354.
- (2) Greindl, J.; Hioe, J.; Sorgenfrei, N.; Morana, F.; Gschwind, R. M. Brønsted Acid Catalysis-Structural Preferences and Mobility in Imine/Phosphoric Acid Complexes. *J. Am. Chem. Soc.* **2016**, *138* (49), 15965–15971.
- (3) Aznar, F.; Valde, C. Modular Synthesis of Indoles from Imines and *o*-Dihaloarenes or *o*-Chlorosulfonates by a Pd-Catalyzed Cascade Process. *J. Am. Chem. Soc.* **2009**, *131* (8), 4031–4041.
- (4) Schramm, Y.; Barrios-Landeros, F.; Pfaltz, A. Discovery of an Iridacycle Catalyst with Improved Reactivity and Enantioselectivity in the Hydrogenation of Dialkyl Ketimines. *Chem. Sci.* **2013**, *4*, 2760–2766.
- (5) Harris, R. K.; Becker, E. D.; Cabral de Menezes, S. M.; Goodfellow, R.; Granger, P. NMR Nomenclature: Nuclear Spin Properties and Conventions for Chemical Shifts. IUPAC Recommendations 2001. International Union of Pure and Applied Chemistry. Physical Chemistry Division. Commission on Molecular Structure and Spectroscopy. *Magn. Reson. Chem.* **2002**, *40* (7), 489–505.
- (6) Trigo-Mouriño, P.; Griesinger, C.; Lee, D. Label-Free NMR-Based Dissociation Kinetics Determination. *J. Biomol. NMR* **2017**, *69* (4), 229–235.
- (7) Akke, M.; Palmer, A. G. Monitoring Macromolecular Motions on Microsecond to Millisecond Time Scales by R 1  $\rho$  –R 1 Constant Relaxation Time NMR Spectroscopy. *J. Am. Chem. Soc.* **1996**, *118* (4), 911–912.
- (8) Palmer, A. G.; Kroenke, C. D.; Loria, J. P. *Nuclear Magnetic Resonance Methods for Quantifying Microsecond-to-Millisecond Motions in Biological Macromolecules*; Elsevier Masson SAS, 2001; Vol. 339.
- (9) Melikian, M.; Gramüller, J.; Hioe, J.; Greindl, J.; Gschwind, R. M. Brønsted Acid Catalysis – the Effect of 3,3'-Substituents on the Structural Space and the Stabilization of Imine/Phosphoric Acid Complexes. *Chem. Sci.* **2019**, *10*, 5226–5234.
- (10) Jerschow, A.; Müller, N. Suppression of Convection Artifacts in Stimulated-Echo Diffusion Experiments. Double-Stimulated-Echo Experiments. *J. Magn. Reson.* **1997**, *125* (2), 372–375.
- (11) Stejskal, E. O.; Tanner, J. E. Spin Diffusion Measurements: Spin Echoes in the Presence of a Time-Dependent Field Gradient. *J. Chem. Phys.* **1965**, *42* (1), 288–292.
- (12) MacChioni, A.; Ciancaleoni, G.; Zuccaccia, C.; Zuccaccia, D. Determining Accurate Molecular Sizes in Solution through NMR Diffusion Spectroscopy. *Chem. Soc. Rev.* **2008**, *37* (3), 479–489.
- (13) Chen, H. C.; Chen, S. H. Diffusion of Crown Ethers in Alcohols. *J. Phys. Chem.* **1984**, *88* (21), 5118–5121.
- (14) Ben-Amotz, D.; Willis, K. G. Molecular Hard-Sphere Volume Increments. *J. Phys. Chem.* **1993**, *97* (29), 7736–7742.
- (15) Zuccaccia, D.; Macchioni, A. An Accurate Methodology to Identify the Level of Aggregation in Solution by PGSE NMR Measurements: The Case of Half-Sandwich Diamino Ruthenium(II) Salts. *Organometallics* **2005**, *24* (14), 3476–3486.
- (16) Reid, J. P.; Goodman, J. M. Goldilocks Catalysts: Computational Insights into the Role of the 3,3' Substituents on the Selectivity of BINOL-Derived Phosphoric Acid Catalysts. *J. Am. Chem. Soc.* **2016**, *138* (25), 7910–7917.
- (17) J. M. Tao; J. P. Perdew; V. N. Staroverov; G. E. Scuseria. Climbing the density functional ladder: Nonempirical meta-generalized gradient approximation designed for molecules and solids. *Phys. Rev. Lett.* **2003**, *91*, 146401.
- (18) S. Grimme; J. Antony, S. Ehrlich; H. Krieg. A consistent and accurate ab initio parameterization of density functional dispersion correction (DFT-D) for the 94 elements H-Pu. *J. Chem. Phys.* **2010**, *132*, 154104.
- (19) A. V. Marenich; C. J. Cramer; D. G. Truhlar. Universal solvation model based on solute electron density and a continuum model of the solvent defined by the bulk dielectric constant and atomic surface tensions. *J. Phys. Chem. B*, **2009**, *113*, 6378–6396.

- (20) S. Grimme. Improved second-order Møller–Plesset perturbation theory by separate scaling of parallel- and antiparallel-spin pair correlation energies. *J. Chem. Phys.*, **2003**, *118*, 9095.
- (21) Gaussian 09, Revision D.01, M. J. Frisch; G. W. Trucks; H. B. Schlegel; G. E. Scuseria; M. A. Robb; J. R. Cheeseman; G. Scalmani; V. Barone; B. Mennucci; G. A. Petersson; H. Nakatsuji; M. Caricato; X. Li; H. P. Hratchian; A. F. Izmaylov; J. Bloino; G. Zheng; J. L. Sonnenberg; M. Hada; M. Ehara; K. Toyota; R. Fukuda; J. Hasegawa; M. Ishida; T. Nakajima; Y. Honda; O. Kitao; H. Nakai; T. Vreven; J. A. Montgomery, Jr.; J. E. Peralta; F. Ogliaro; M. Bearpark; J. J. Heyd; E. Brothers; K. N. Kudin; V. N. Staroverov; R. Kobayashi; J. Normand; K. Raghavachari; A. Rendell; J. C. Burant; S. S. Iyengar; J. Tomasi; M. Cossi; N. Rega; J. M. Millam; M. Klene; J. E. Knox; J. B. Cross; V. Bakken; C. Adamo; J. Jaramillo; R. Gomperts; R. E. Stratmann; O. Yazyev; A. J. Austin; R. Cammi; C. Pomelli; J. W. Ochterski; R. L. Martin; K. Morokuma; V. G. Zakrzewski; G. A. Voth; P. Salvador; J. J. Dannenberg; S. Dapprich; A. D. Daniels; Ö. Farkas; J. B. Foresman; J. V. Ortiz; J. Cioslowski; D. J. Fox, Gaussian, Inc., Wallingford CT, 2009.
- (22) F. Neese. Software update: the ORCA program system, version 4.0. *WIREs Comput Mol Sci*, **2018**, *8*:e1327. doi: 10.1002/wcms.1327
- (23) S. Grimme; C. Bannwarth; P. Shushkov. A Robust and Accurate Tight-Binding Quantum Chemical Method for Structures, Vibrational Frequencies, and Noncovalent Interactions of Large Molecular Systems Parametrized for All spd-Block Elements (Z=1–86). *J. Chem. Theory Comput.* **2017**, *13*, 1989.
